# Supplementary material
Source: PubMed Central journal article supplement (PMC3292678)
Supplement: NIHMS349328-supplement-2.pdf [file NIHMS349328-supplement-2.pdf]

## Supplementary Note 1: BAC selection strategy and assembly of the rhesus MSY sequence

The CHORI-250 BAC library had been fingerprinted and assembled into fingerprint contigs at the Michael Smith Genome Sciences Centre (<http://www.bcgsc.ca/downloads/rhesusmap.tar.gz>). We identified Y chromosome fingerprint contigs by searching for contigs containing multiple BACs with end sequences that did not match the female whole-genome shotgun sequence. We then verified the male-specificity of these contigs using +/- PCR assays on male and female genomic DNA and selected tiling paths of clones for sequencing. We used high-density filter hybridization with pools of overgo probes to identify clones from the CHORI-250 and RMAEX libraries to fill gaps.

The assembled rhesus MSY sequence spans 11.0 megabases (Mb) in three contigs (Supplementary File 1). The largest contig (7.9 Mb) is anchored by the pseudoautosomal region, which was confirmed to be located at the distal end of the chromosome by extended metaphase fluorescence in situ hybridization (EM-FISH) (Supplementary Fig. 2). The smallest contig (1.1 Mb) is bounded by the centromere. The rhesus Y is acrocentric, as determined by EM-FISH (Supplementary Fig. 3). Therefore, the third contig (1.9 Mb) is located between the 7.9 Mb and 1.1 Mb contigs. We determined the orientation of the 1.9 Mb contig by EM-FISH (Supplementary Fig. 4) and radiation hybrid mapping (Supplementary Fig. 5 and Supplementary File 2). We conclude that our assembled sequence is nearly complete based on the small size of the gaps between the three contigs as determined by interphase FISH (Supplementary Fig. 6).

## Supplementary Note 2: Determination of X-Y ancestral gene content within strata 1-5.

For this analysis, we used the human X-linked protein-coding gene set from Ensembl. We ordered the genes according to their position on the human X chromosome, which is an approximation of the gene order on the ancestral chromosome, and divided the genes into strata according to boundaries given in Lahn and Page<sup>1</sup> and Ross, *et al.*<sup>2</sup>. We then determined whether each gene was present in the X-Y common ancestor or added to the X chromosome after X-Y differentiation according to the following criteria (see Supplementary Table 4):

1. From Bellott *et al.*<sup>3</sup>: Autosomal progenitors of the human X and Y chromosomes are represented in chicken chromosomes 1 and 4, so a gene with a homolog in a syntenic location within one of these chicken chromosomes is ancestral. (Note: all strata 4 and 5 genes have homologs on chicken 4).
2. From Bellott *et al.*<sup>3</sup> If a gene is absent from chicken 1 or 4, it may have been added to the X or lost in chicken. If such a gene is present in a syntenic location in at least one outgroup species (*Xenopus tropicalis* or *Anolis carolinensis*), it is ancestral.
3. The remaining genes were presumably added to the X sometime during mammalian evolution. We determined the approximate timing of introduction to the X by searching for syntenic loci in various other mammalian X chromosome sequences: rhesus, marmoset, mouse, rat, dog, bovine and opossum. Specifically, we used TBLASTX to search for hits for each gene in question as well as its two neighboring genes. (Note: All other X chromosome assemblies, with the exception of mouse, are draft sequences, so some genes will be absent because of missing data.) For strata 1 and 2, which formed prior to the eutherian (placental mammals) – metatherian (marsupial mammals) split, a gene was considered ancestral only if it was found in opossum. For stratum 3, which was formed prior to the eutherian radiation, a gene was considered ancestral if it was found in at least two non-primate species.

Each MSY gene and pseudogene was in turn considered ancestral if its X-linked counterpart was classified as ancestral. All but two MSY genes, *TSPY* and *AMELY*, have X-linked counterparts with homologs on chicken 1 and 4. A homolog of *TSPYL2*, which is the X counterpart of *TSPY*, is present in *Xenopus tropicalis* in the same

sequence contig as homologs of two syntenic genes: *KDM5C* and *GPR173*. A homolog of *AMELX* is present in *Xenopus tropicalis* in the same sequence contig as homologs of two syntenic genes: *ARHGAP6* and *CXorf22*.

Supplementary Note 3: Human/chimpanzee/rhesus ancestral MSY gene content.

We deduce that within strata 1-4, the MSY of the human/chimpanzee/rhesus common ancestor had the same set of ancestral genes as that of the present-day rhesus and human MSY's and, therefore, there has been no gene loss in either species within these strata. While it is formally possible that the human/chimpanzee/rhesus common ancestor had additional ancestral genes and the same ancestral genes were lost independently in each lineage, we believe that this is highly unlikely for the following reason: The X-degenerate regions of the three species are composed of the same segments of X-homologous sequence (Supplementary Figs. 8 and 9), implying that the deletion events that removed all but the remaining few X-homologous genes occurred in the common ancestor of these species. The likelihood of the alternative scenario – that the same exact series of deletion events occurred independently in each lineage – is extremely low.

Supplementary Note 4: Discussion of dN/dS values for ancestral genes.

The dN/dS ratios for the ancestral genes were calculated from alignments of rhesus and human homologs and are given in Supplementary Table 3. These values range widely, from 0.09 for *NLGN4Y* to 1.33 for *AMELY*. Of the 19 ancestral genes, 12 display evidence for purifying selection, with dN/dS ratios of 0.33 or less and statistically significant deviation from neutrality by Fisher's exact test. Of the remaining 7 genes, only *AMELY* has a dN/dS ratio greater than 0.7. This gene is one of the smallest ancestral genes so the confidence intervals for this calculation are large (0.61-2.98). Therefore, we would not conclude that this gene has experienced the effects of positive selection or relaxed constraint. We also calculated dN/dS for *MXRA5Y*, which is intact in rhesus but a pseudogene in human. As expected, the dN/dS ratio at this locus is high (0.99) reflecting its neutral evolution in the human lineage. We performed sliding window dN/dS analyses to determine if selection was operating differently at distinct locations with each gene, and the results are shown in Supplementary Figure 16. In

most cases, the dN/dS value varies along the length of the gene. However, most genes also have an extended region that displays a very low dN/dS value, confirming the operation of purifying selection on these genes.

Supplementary Note 5: Determining time of pseudogene inactivation.

Within the older strata, five of six pseudogenes display at least one inactivating mutation shared between rhesus, human and chimpanzee, so their inactivation predates the OWM-ape split (see Supplementary Fig. 15). We cannot date with certainty the inactivation of the four pseudogenes within stratum 5 or the sixth pseudogene in the older strata, however, because these loci have been deleted outright in rhesus. All five of these pseudogenes are located within a single 280-kb region in human, so they were likely removed by one large deletion in the rhesus lineage.

#### LITERATURE CITED

- <sup>1</sup> Lahn, B. T. & Page, D. C. Four evolutionary strata on the human X chromosome. *Science* **286**, 964-967 (1999).
- <sup>2</sup> Ross, M. T. *et al.* The DNA sequence of the human X chromosome. *Nature* **434**, 325-337 (2005).
- <sup>3</sup> Bellott, D. W. *et al.* Convergent evolution of chicken Z and human X chromosomes by expansion and gene acquisition. *Nature* **466**, 612-616 (2010).

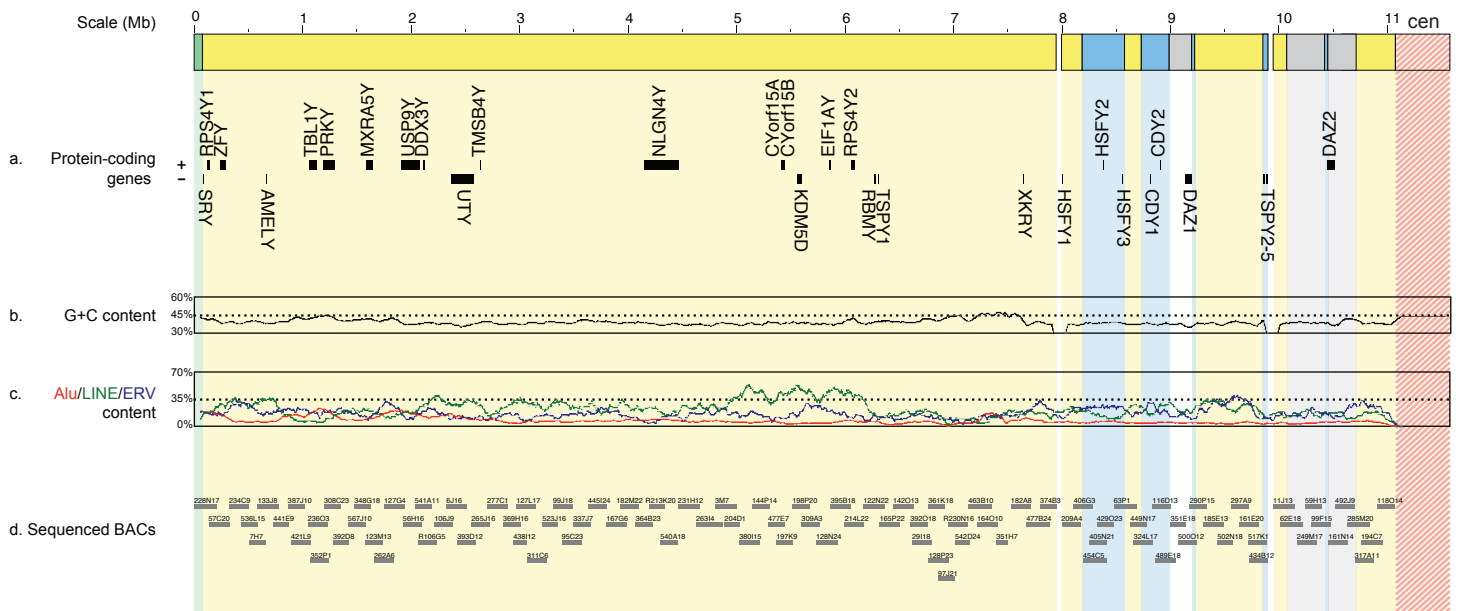

**Supplementary Figure 1** Annotated sequence of rhesus MSY. Background colors represent five different sequence classes: pseudoautosomal (green); X-degenerate (yellow); ampliconic (blue); other (gray); and heterochromatic (pink stripes). Gaps shown in white. All sequence features and BACs drawn to scale. a. Positions of all intact, actively transcribed genes. Plus (+) strand above, minus (-) strand below. b. G+C content (%) calculated in a 100-kb sliding window with 1-kb steps. c. Alu, LINE, and endogenous retrovirus (ERV) densities, expressed as percentage of nucleotides, calculated in a 200-kb sliding window with 1-kb steps. d. Sequenced MSY BACs. Each bar represents the size and position of one BAC clone, labeled with the library identifier. BAC clones with no prefix are from the CHORI-250 library. BAC clones with prefix “R” are from the RMAEX library.

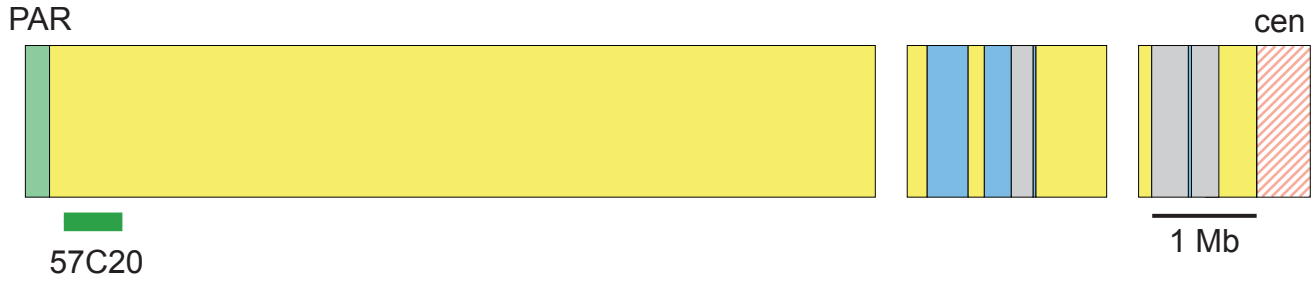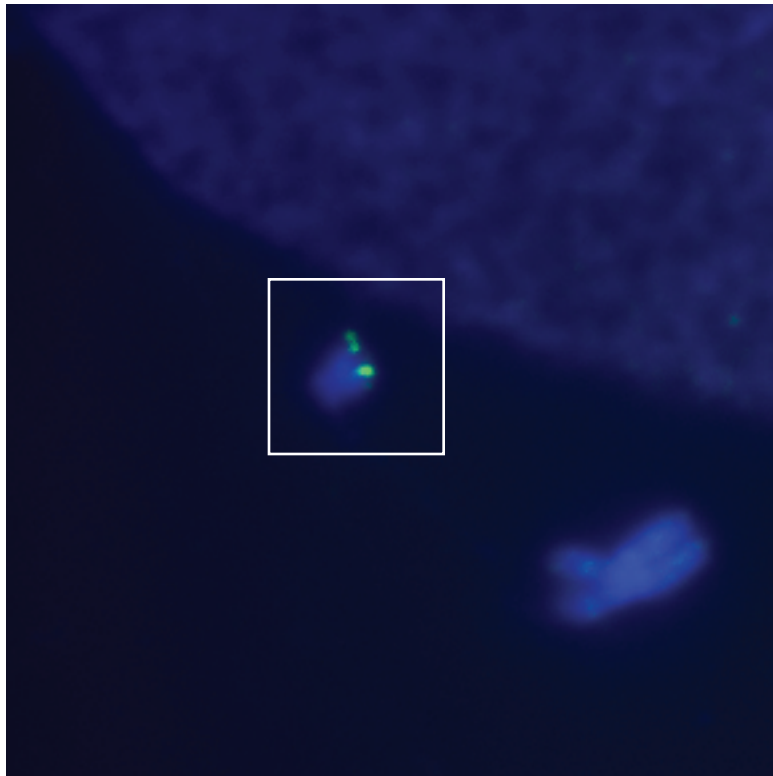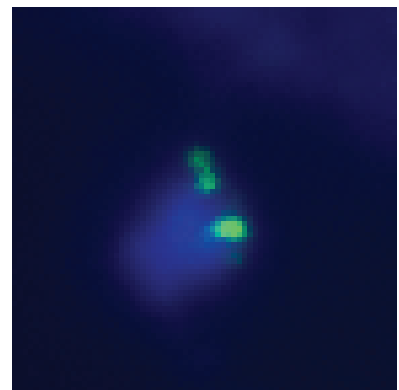

**Supplementary Figure 2** Extended metaphase FISH analysis of pseudoautosomal boundary (PAB). Confirms that PAB is located at one end of rhesus Y chromosome. Probe 57C20 (not drawn to scale) is a BAC clone from rhesus CHORI-250 library. PAR = pseudoautosomal region; cen = centromere.

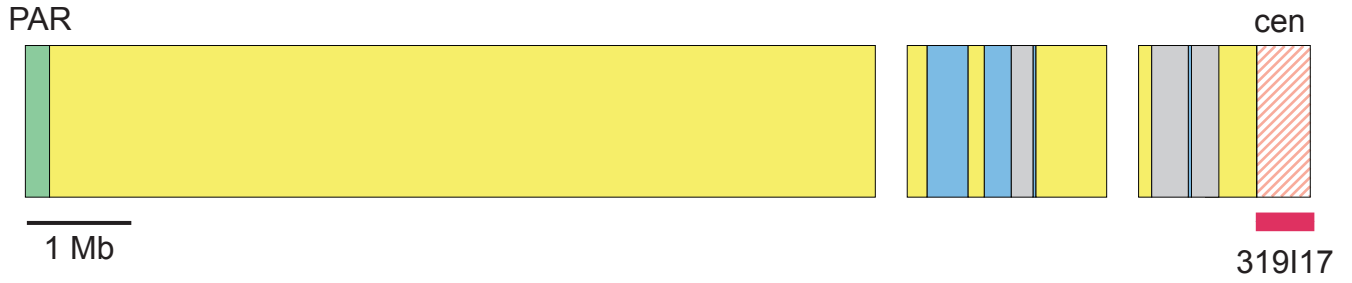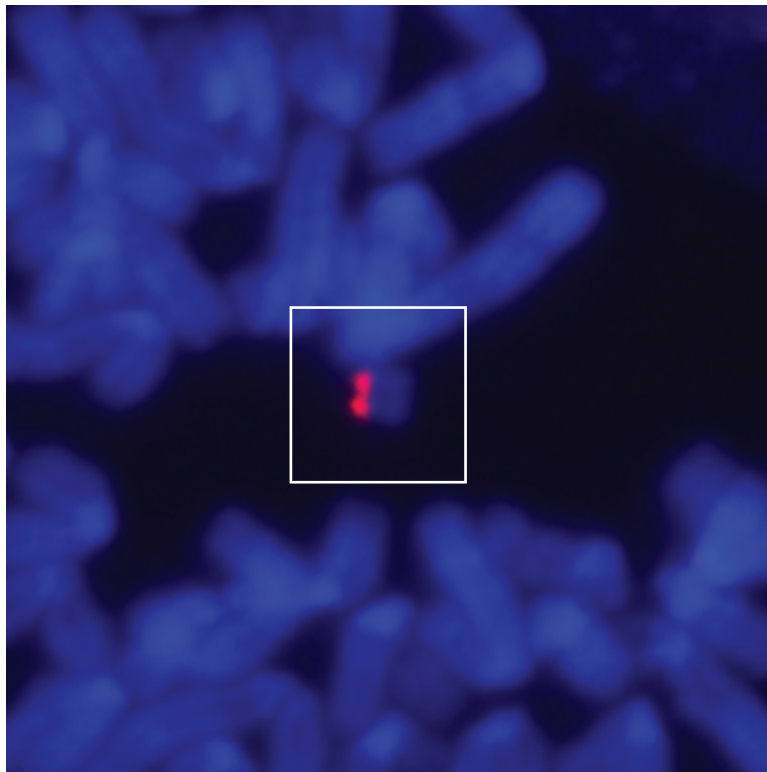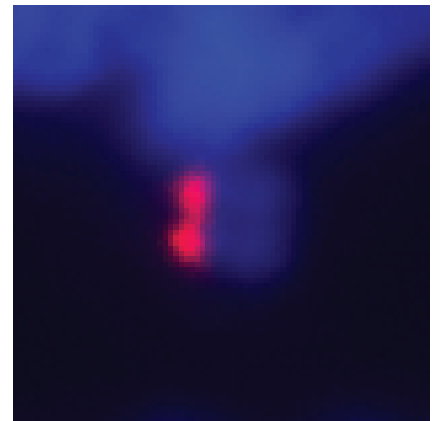

**Supplementary Figure 3** Extended metaphase FISH analysis of centromere. Confirms that centromere is located at one end of rhesus Y chromosome. Probe 319I17 (not drawn to scale) is a BAC clone from rhesus CHORI-250 library. PAR = pseudoautosomal region; cen = centromere.

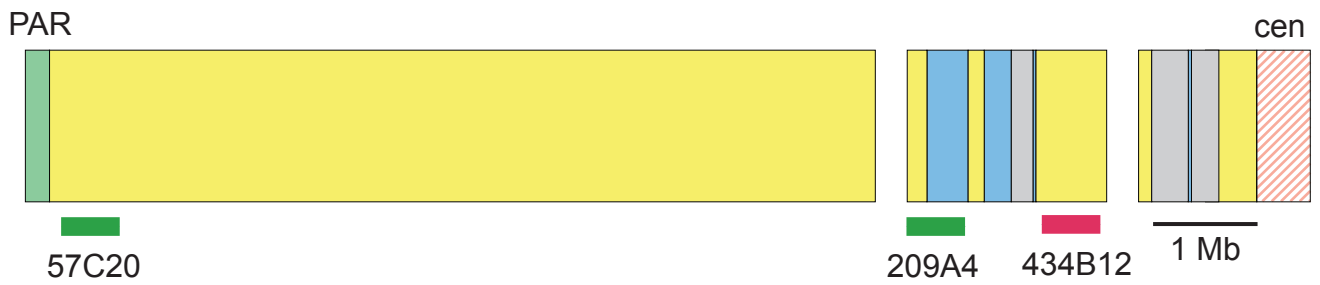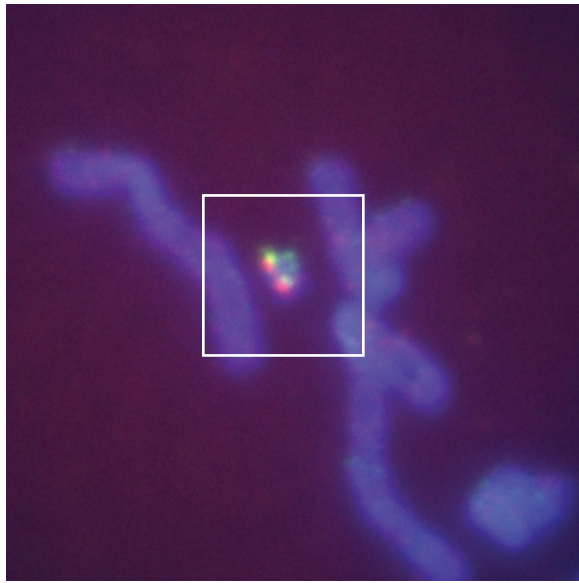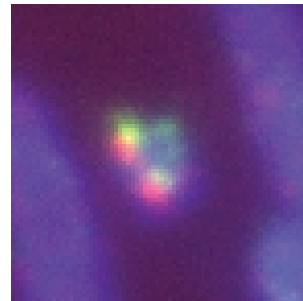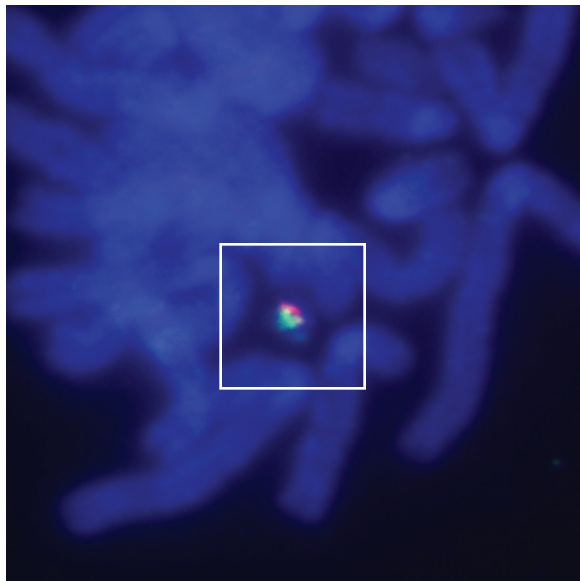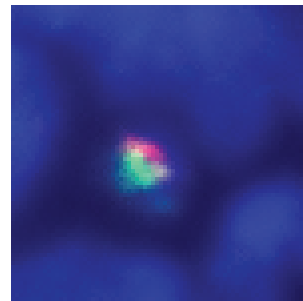

**Supplementary Figure 4** Extended metaphase FISH analysis reveals orientation of middle contig. Probes 57C20, 209A4 and 434B12 (not drawn to scale) are BAC clones from rhesus CHORI-250 library. PAR = pseudoautosomal region; cen = centromere.



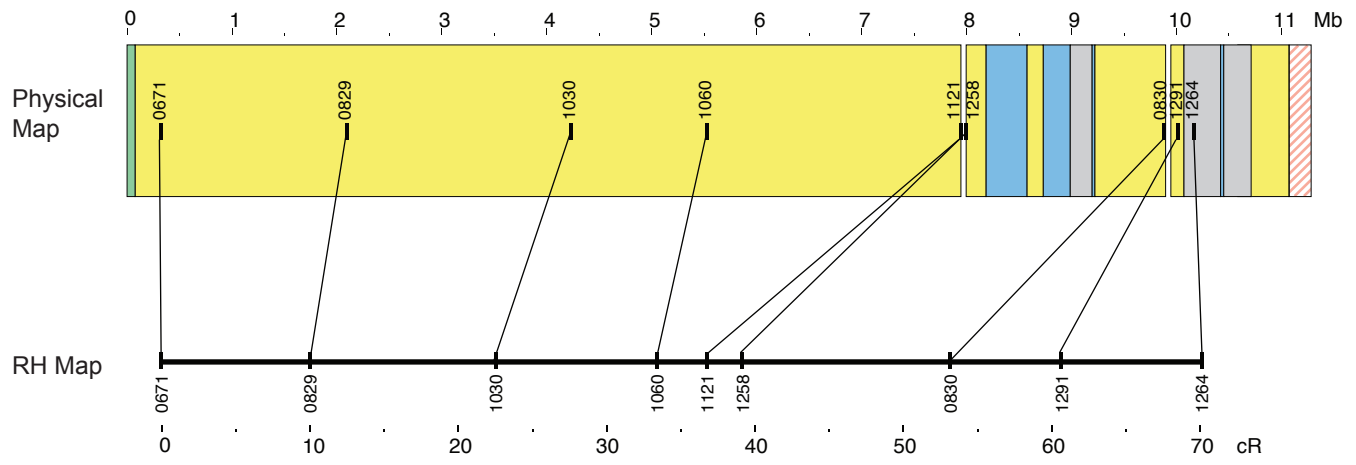

**Supplementary Figure 5** Comparison of radiation hybrid (RH) and physical maps of rhesus MSY. Locations of nine RH markers on physical map are shown on schematic representation of chromosome at top. Raw data vectors are given in Supplementary File 2. Scale is shown with distances in megabases (Mb). RH map of nine markers (listed in Supplementary Table 7) is shown at bottom. Scale is shown with distances in centirays (cR). 1 cR = 1% recombination frequency.

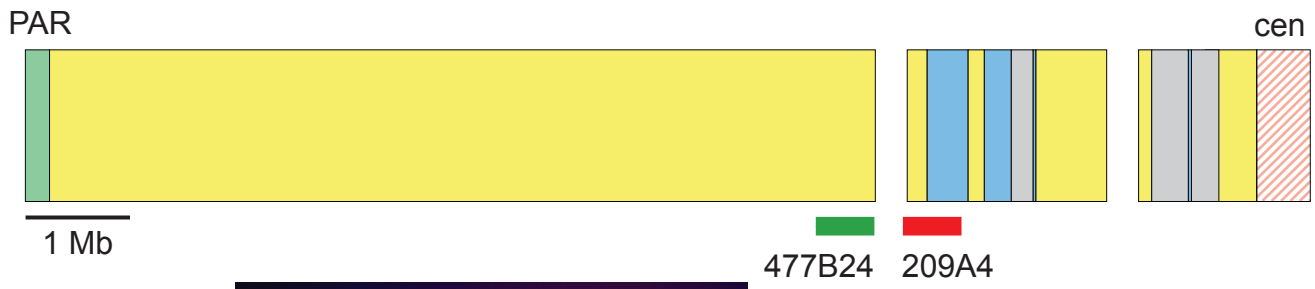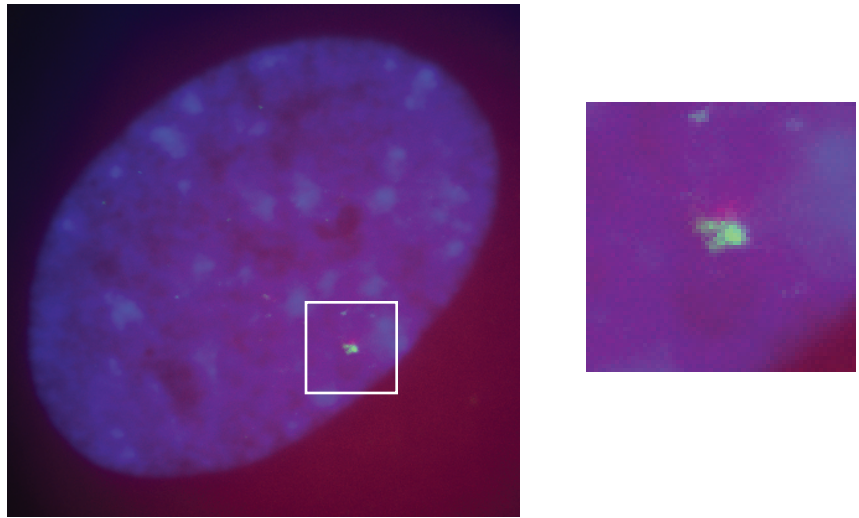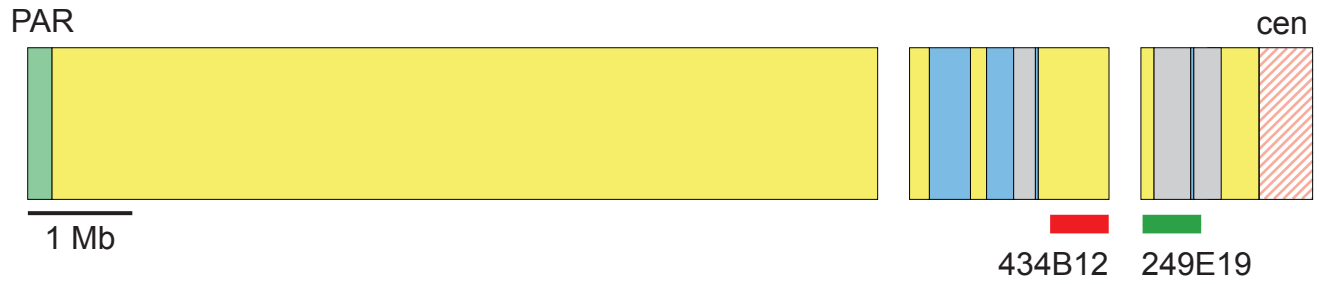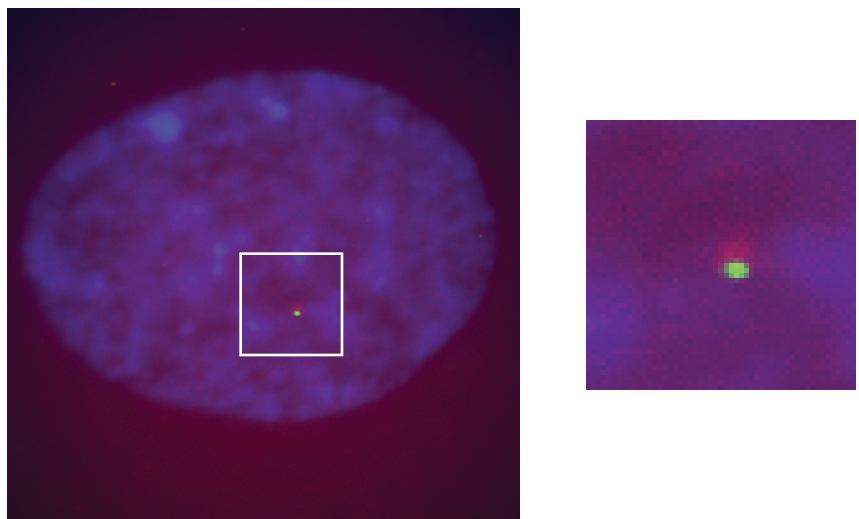

**Supplementary Figure 6** Interphase FISH analysis of gaps. Probes 477B24, 209A4, 434B12, and 249E19 (not drawn to scale) are BAC clones from rhesus CHORI-250 library. PAR = pseudoautosomal region; cen = centromere.

a.

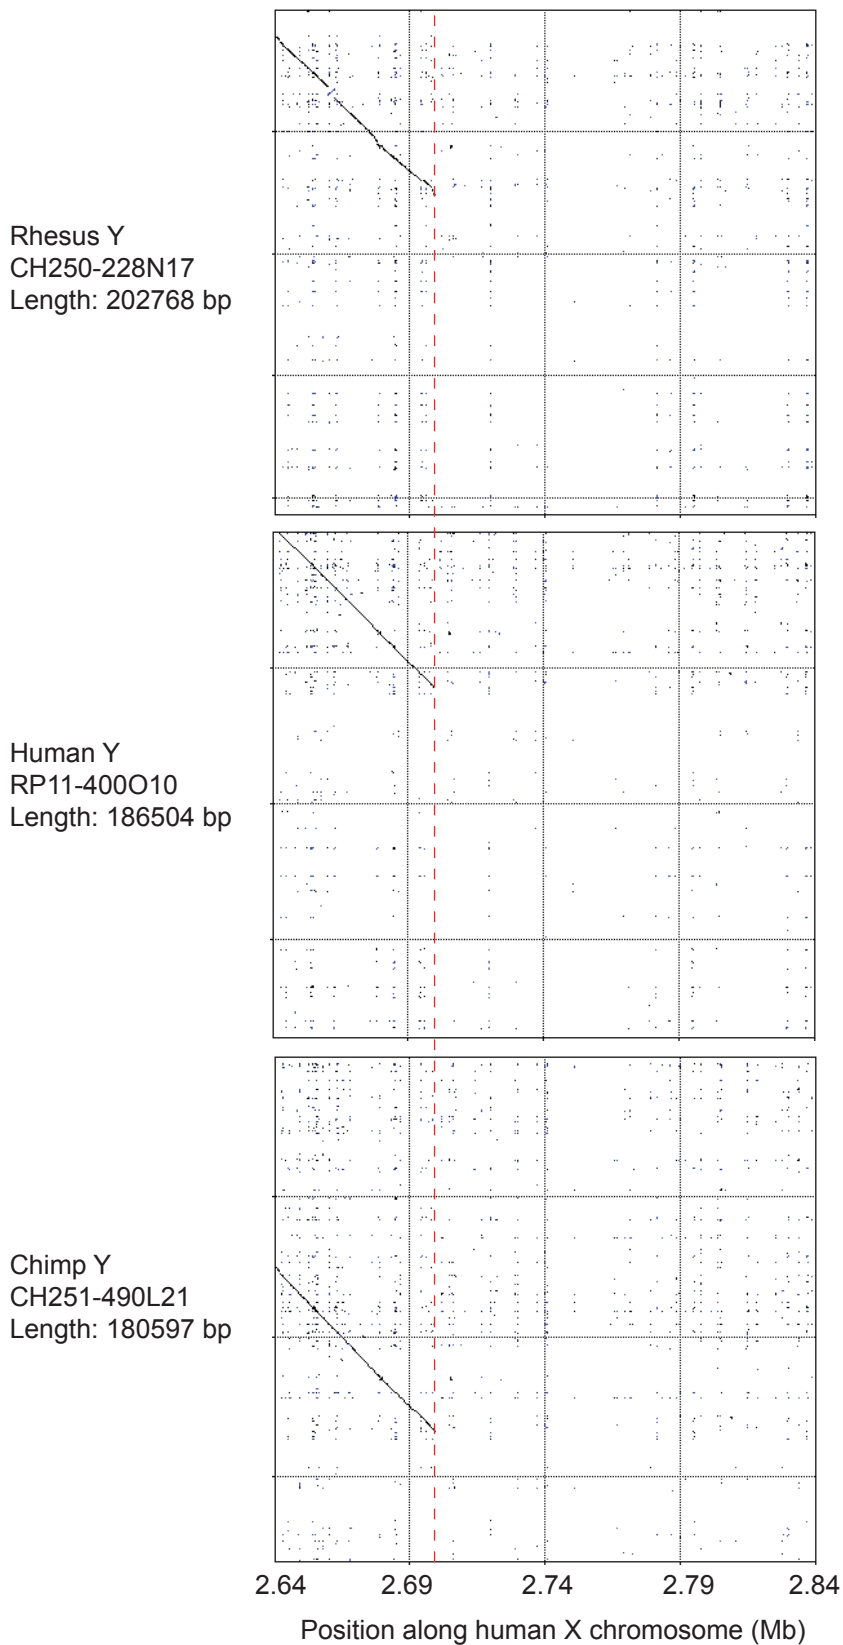

**Supplementary Figure 7a** Comparison of pseudoautosomal boundaries (PABs) in rhesus, human and chimpanzee. Dot plot analyses to demonstrate that position of PAB is identical in all three species. 200-kb sequence spanning PAB of human X chromosome is represented on each X axis. Each Y axis represents sequence from a BAC spanning the Y chromosome PAB in human (top), chimpanzee (middle), and rhesus (bottom). Red dotted line shows position of PAB relative to human X sequence. Each dot plot was constructed in MacVector using a 100-bp window and 85% identity.

b.

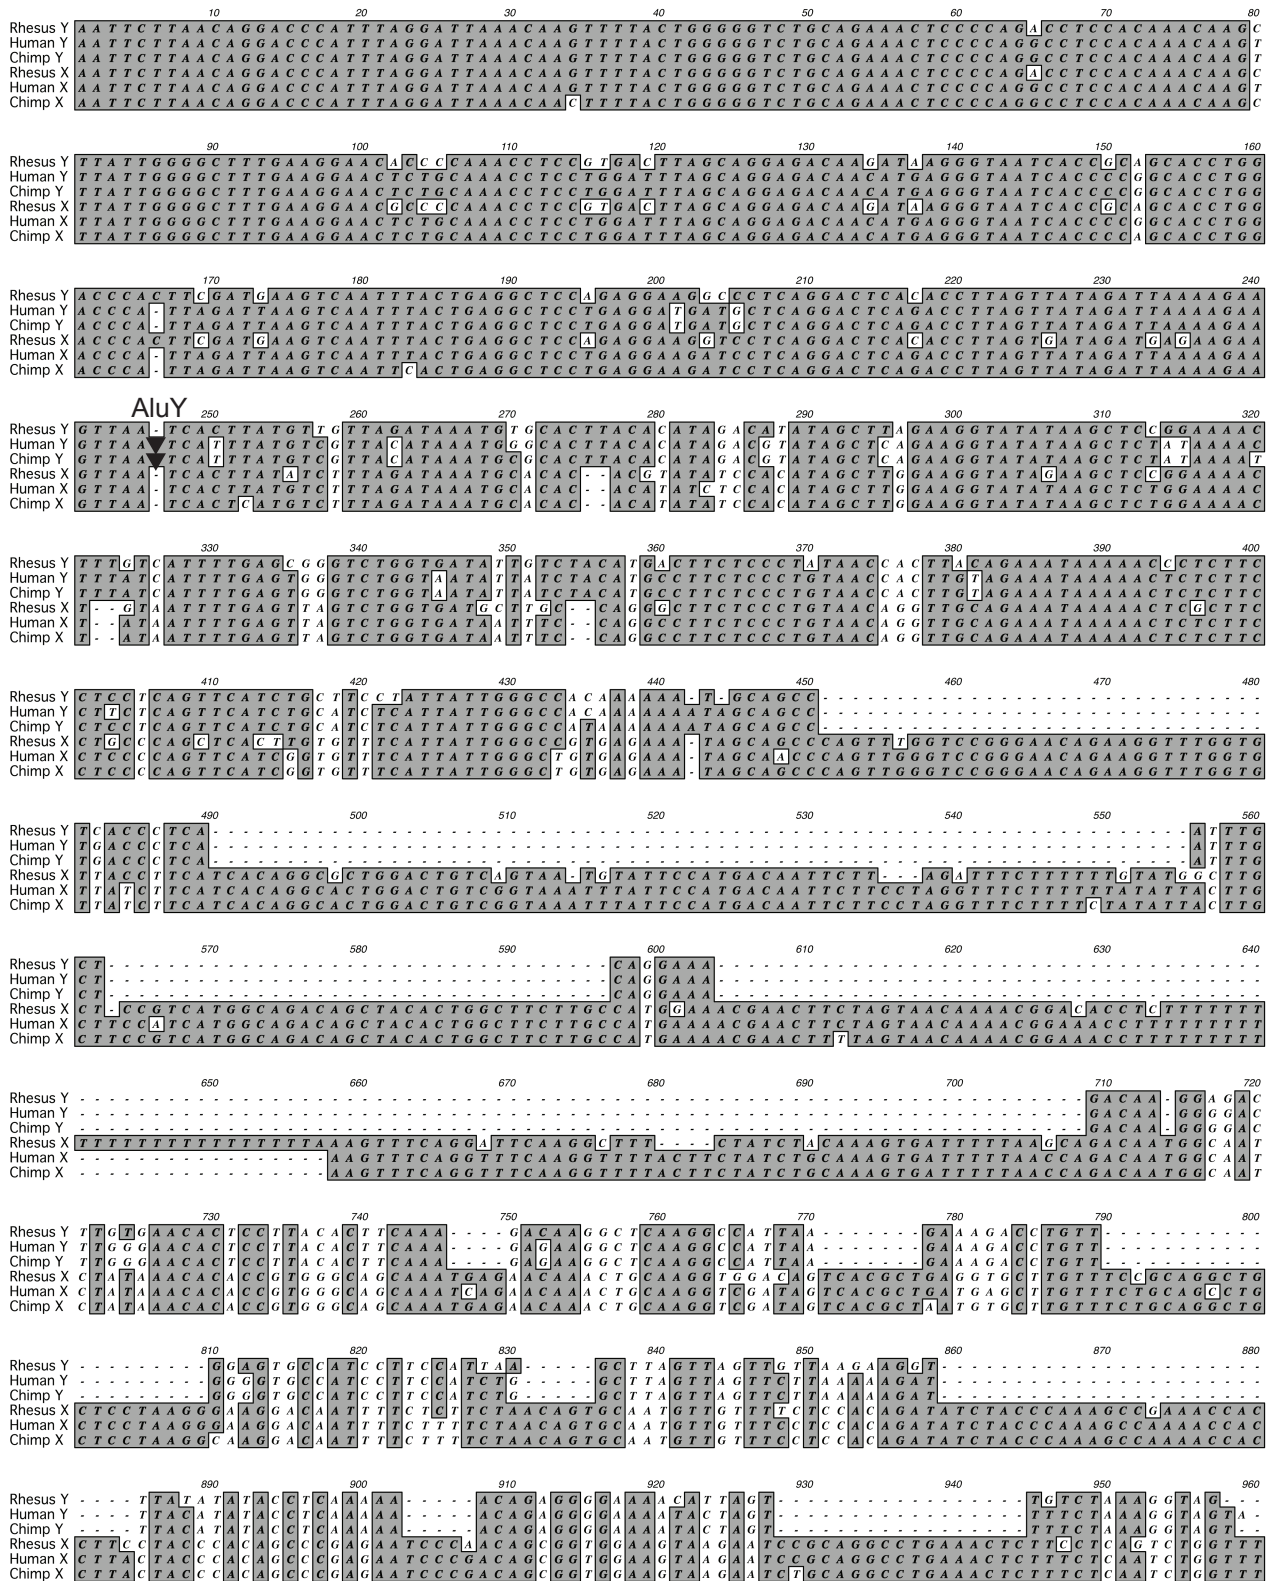

**Supplementary Figure 7b** Comparison of pseudoautosomal boundaries (PABs) in rhesus, human and chimpanzee. Alignment of PAB region of X and Y chromosomes of all three species. Alignment was generated in MacVector using ClustalW. Identical nucleotides are shaded in gray. Position of Alu insertion in human and chimpanzee Y sequences, which marks the location of the PAB, is shown (position 246 in the alignment). Accession numbers for sequences are as follows: Human Y - AC006040; Chimp Y - AC146189; Rhesus Y - AC217136; Human X - NT\_167197; Chimp X - NW\_001251668; Rhesus X - NW\_001218091.

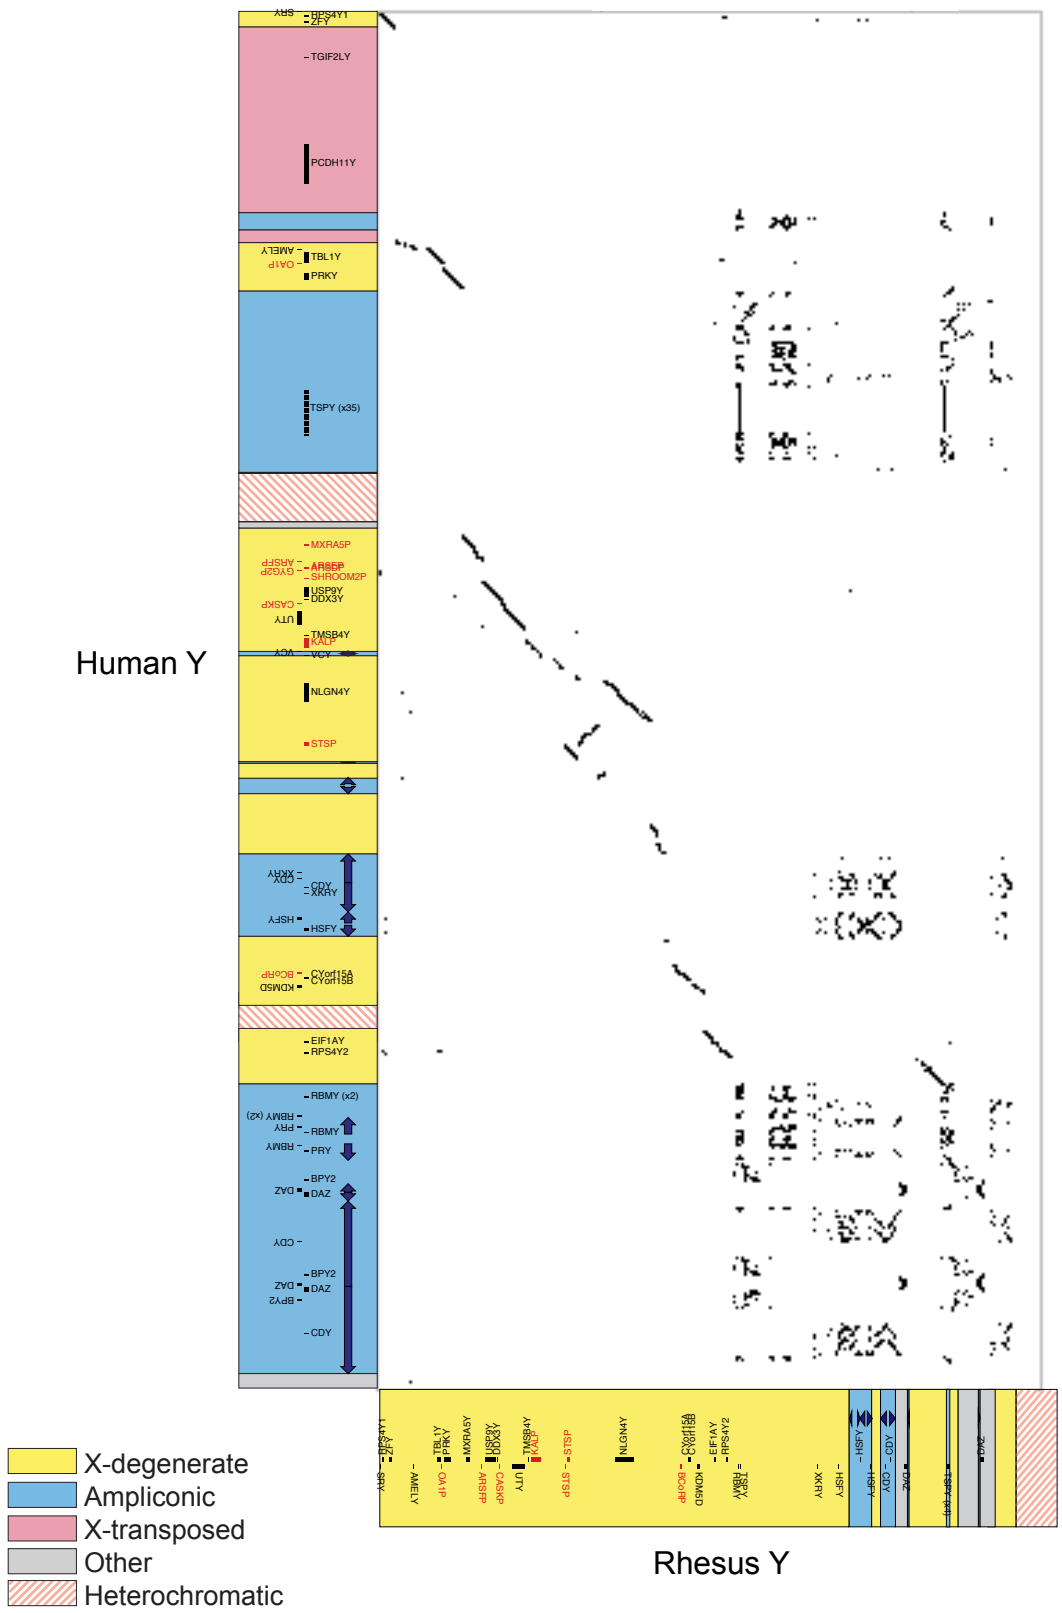

**Supplementary Figure 8** Dot-plot comparison of rhesus and human MSYs. Major features of chromosomes are shown schematically along the axes. Intact genes are in black and pseudogenes are in red. Rhesus sequence was masked prior to analysis using RepeatMasker ([www.repeatmasker.org](http://www.repeatmasker.org)) with default parameters. Each dot on the plot represents 100% identity within a 40-bp window.

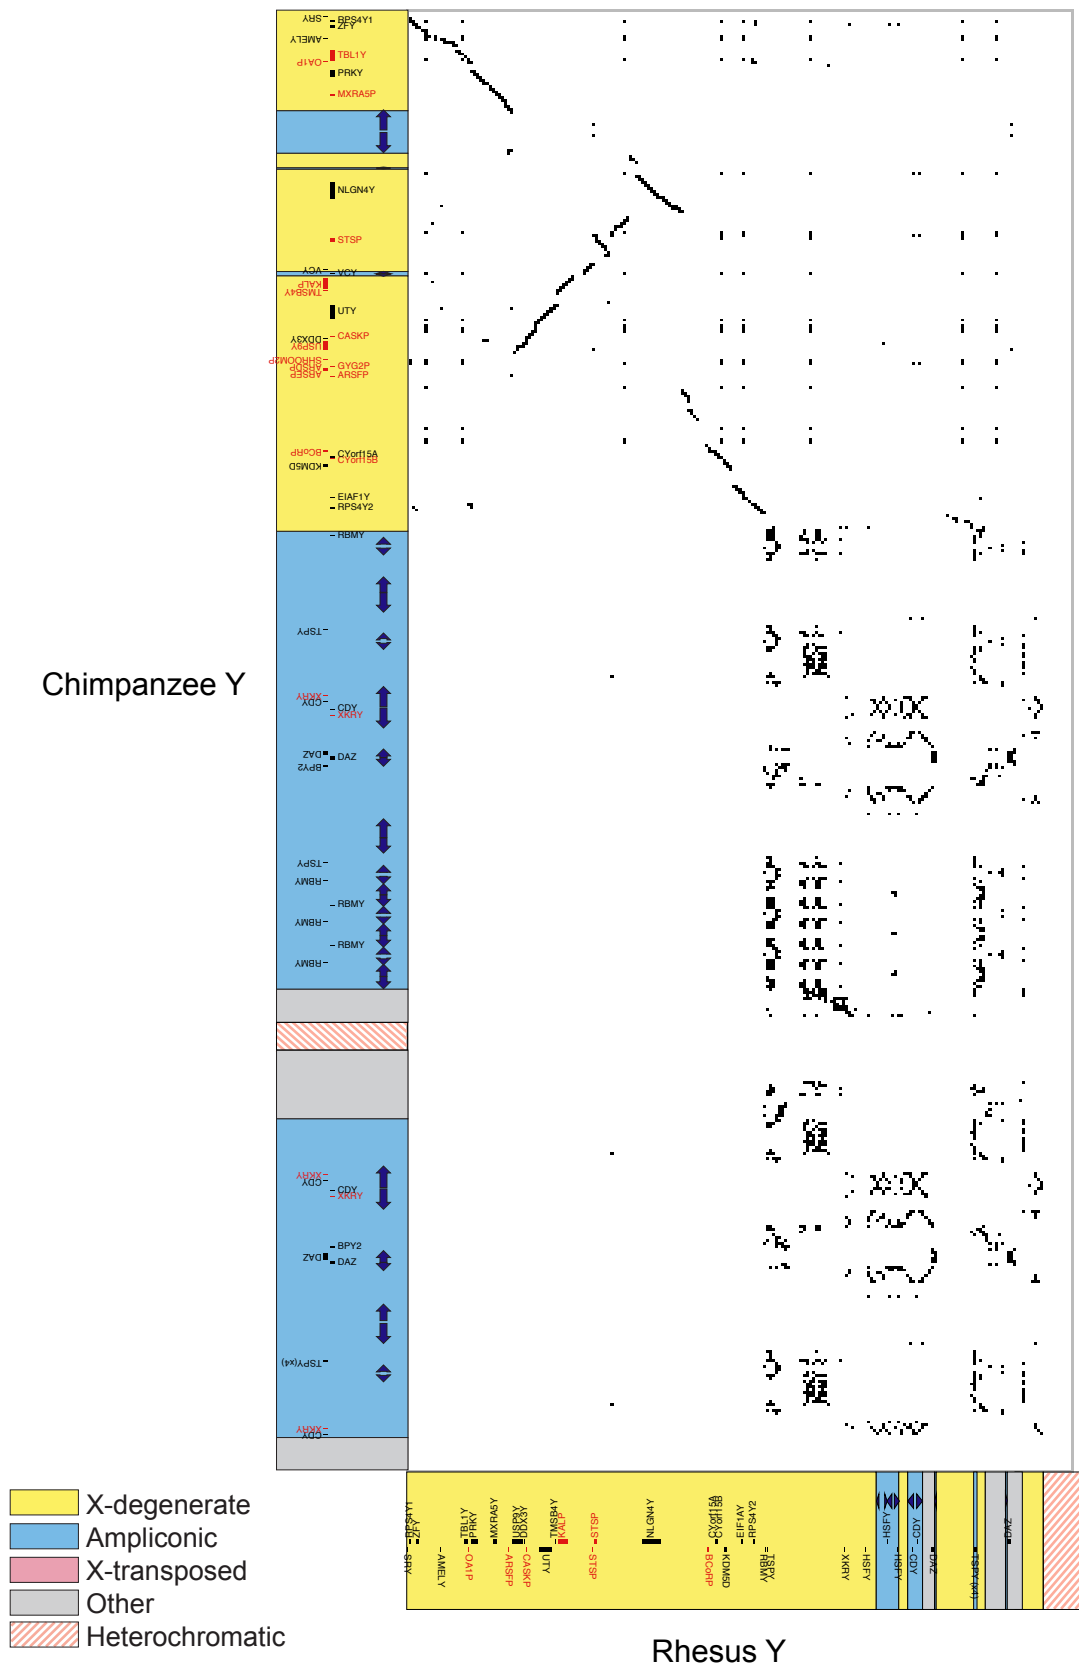

**Supplementary Figure 9** Dot-plot comparison of rhesus and chimpanzee MSYs. Major features of chromosomes are shown schematically along the axes. Intact genes are in black and pseudogenes are in red. Rhesus sequence was masked prior to analysis using RepeatMasker ([www.repeatmasker.org](http://www.repeatmasker.org)) with default parameters. Each dot on the plot represents 100% identity within a 40-bp window.

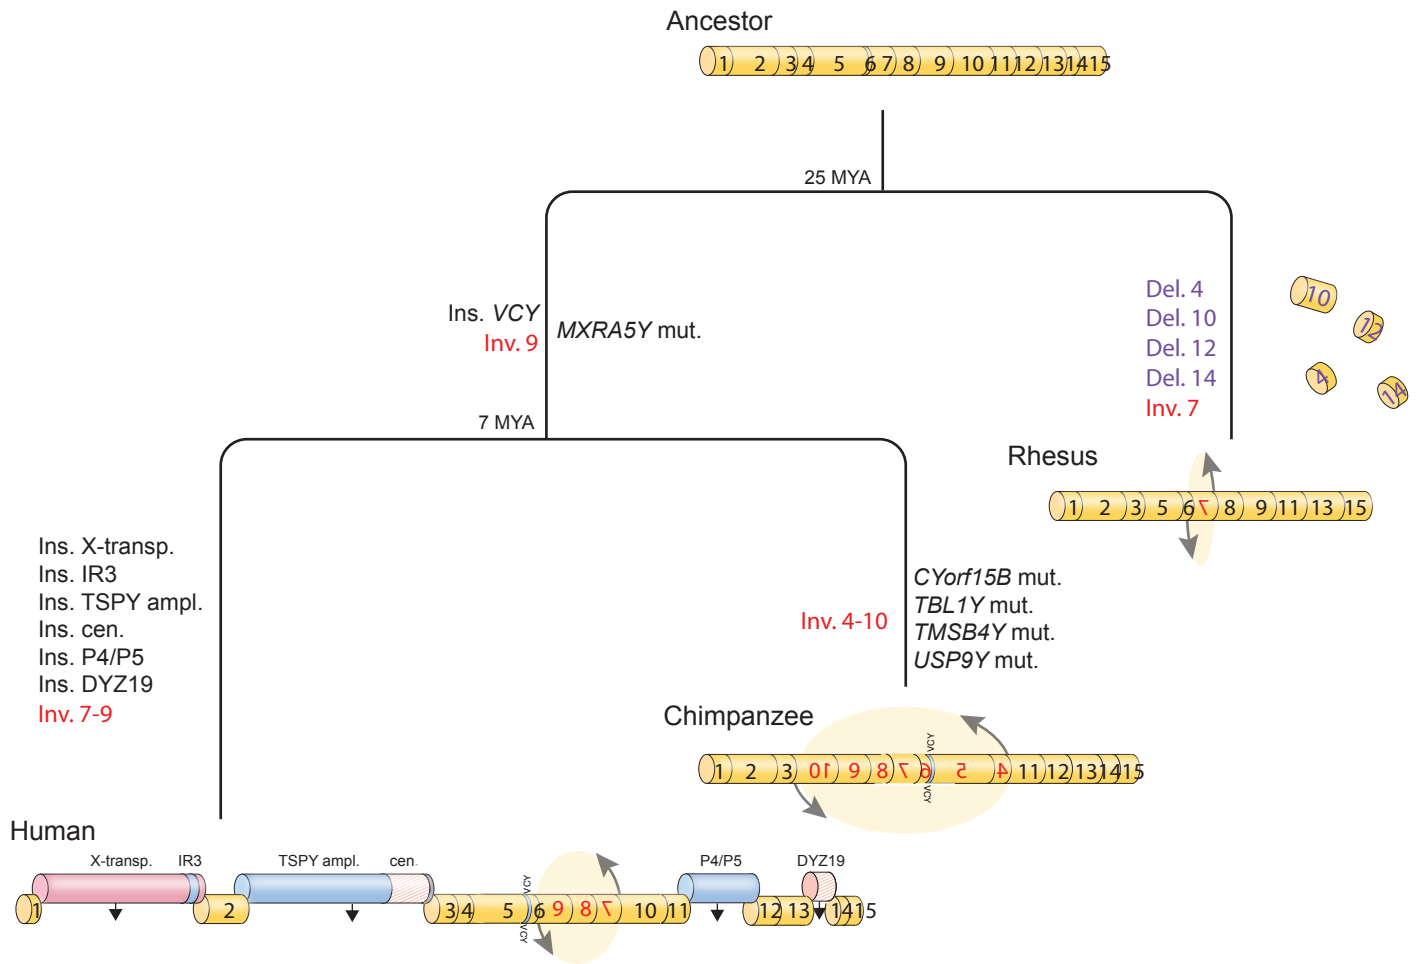

**Supplementary Figure 10** Rearrangements during evolution of rhesus, human and chimpanzee Y chromosomes. Dot-plot analyses (Supplementary Figs 8 & 9) revealed large-scale rearrangement events that occurred in each lineage, enabling the reconstruction of a hypothetical ancestral chromosome. Sequence in ancestral chromosome is divided into 15 syntenic blocks, each > 200 kb in size, which are labeled in each species. Bracketed lines (not to scale) show evolutionary relationships between three extant species and common ancestor. Approximate divergence times are indicated at intersections. Observed large-scale rearrangements (left) and gene changes (right) are indicated on each vertical line. Insertions and deletions < 200 kb in size are not depicted.

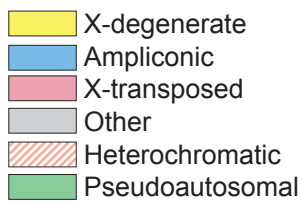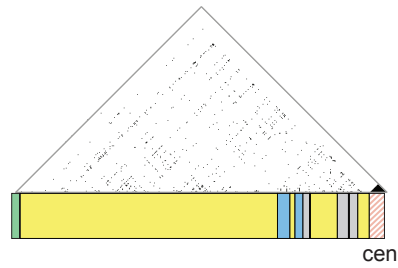

Rhesus Y

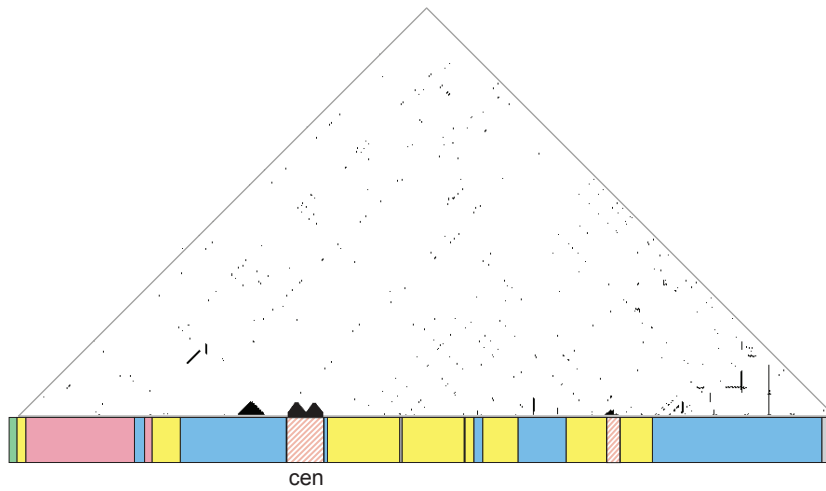

Human Y

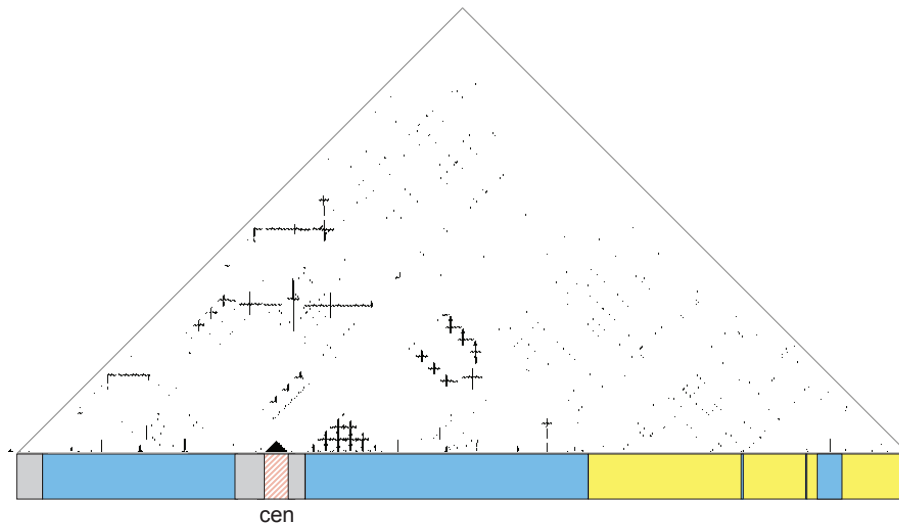

Chimpanzee Y

**Supplementary Figure 11** Triangular dot plots of DNA sequence identities within the rhesus, human, and chimpanzee MSYs. Each dot represents 100% identity within a 200-bp window. Direct repeats appear as horizontal lines, inverted repeats as vertical lines, and palindromes as vertical lines that nearly intersect the baseline. Immediately below the plots are schematic depictions of the MSY sequences, with colors representing MSY sequence classes. cen = centromere.



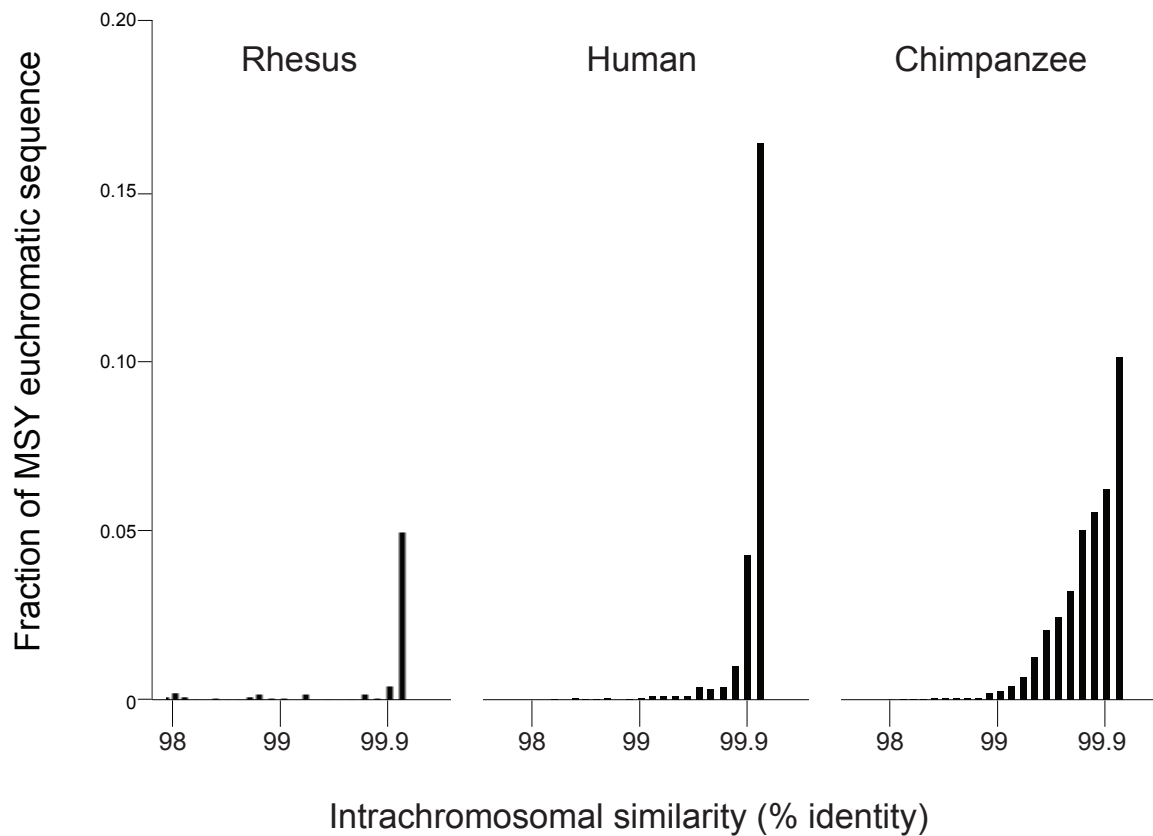

**Supplementary Figure 12** Electronic fractionation of rhesus, human and chimpanzee MSY sequences according to intrachromosomal similarity. Percent identity to other MSY sequences is plotted on a logarithmic scale. Values < 98% are not shown. Analyses were performed using custom Perl code that used BLAST to compare all 5-kb sequence segments, in 2-kb steps, to the entire remainder of the MSY sequence.

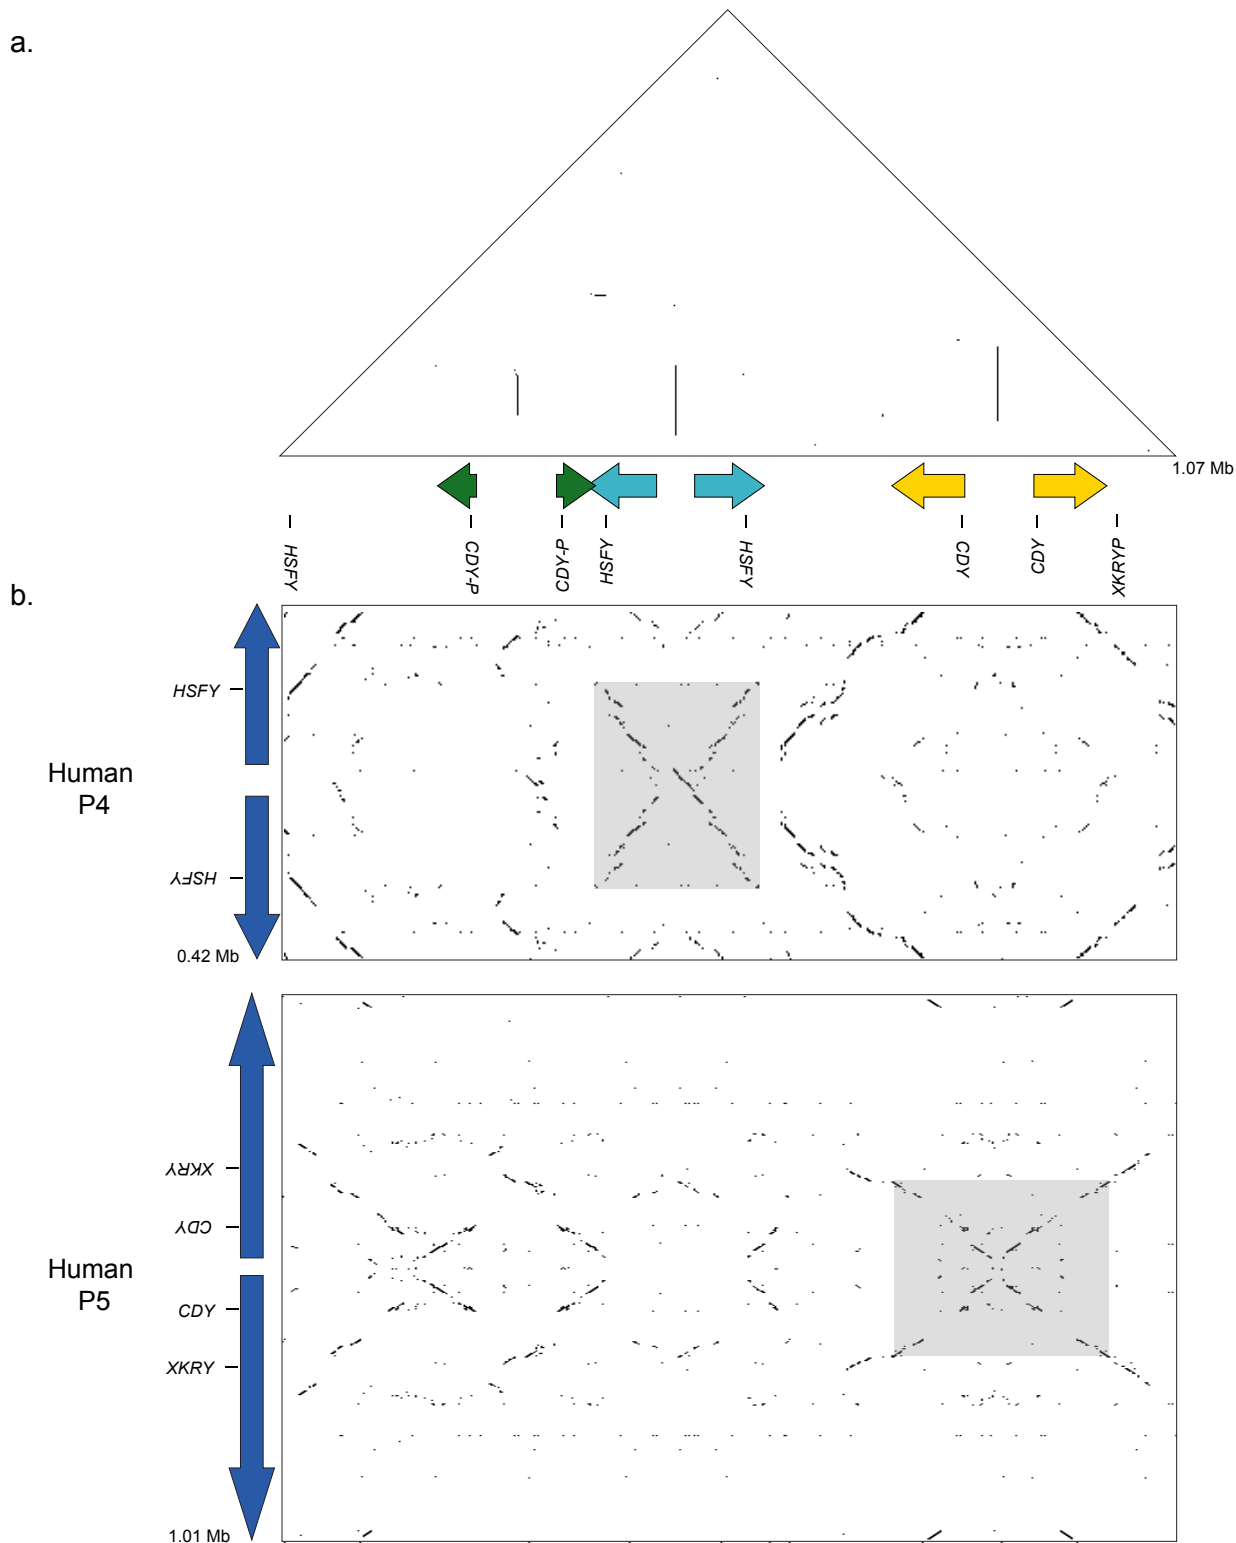

**Supplementary Figure 13** a. Triangular dot plot of DNA sequence identities within major rhesus ampliconic region. The region represented corresponds to the first 1.07 Mb of the middle contig (Supplementary Figure 1). Each dot represents 100% identity within a 200-bp window. Direct repeats appear as horizontal lines and palindromes as vertical lines that nearly intersect the baseline. Immediately below the plot is a schematic depiction of the organization of palindromes. Positions of genes are shown below palindromes; “P” after gene name indicates pseudogene. b. Dot plot comparisons of same 1.07 Mb region of rhesus sequence from part a to orthologous palindromes P4 and P5 in human. Human sequence was masked with RepeatMasker prior to analyses. Each dot represents 100% identity within a 20-bp window. Gray shading indicates regions of homology between rhesus and human palindromes, indicative of the shared ancestry of these structures.

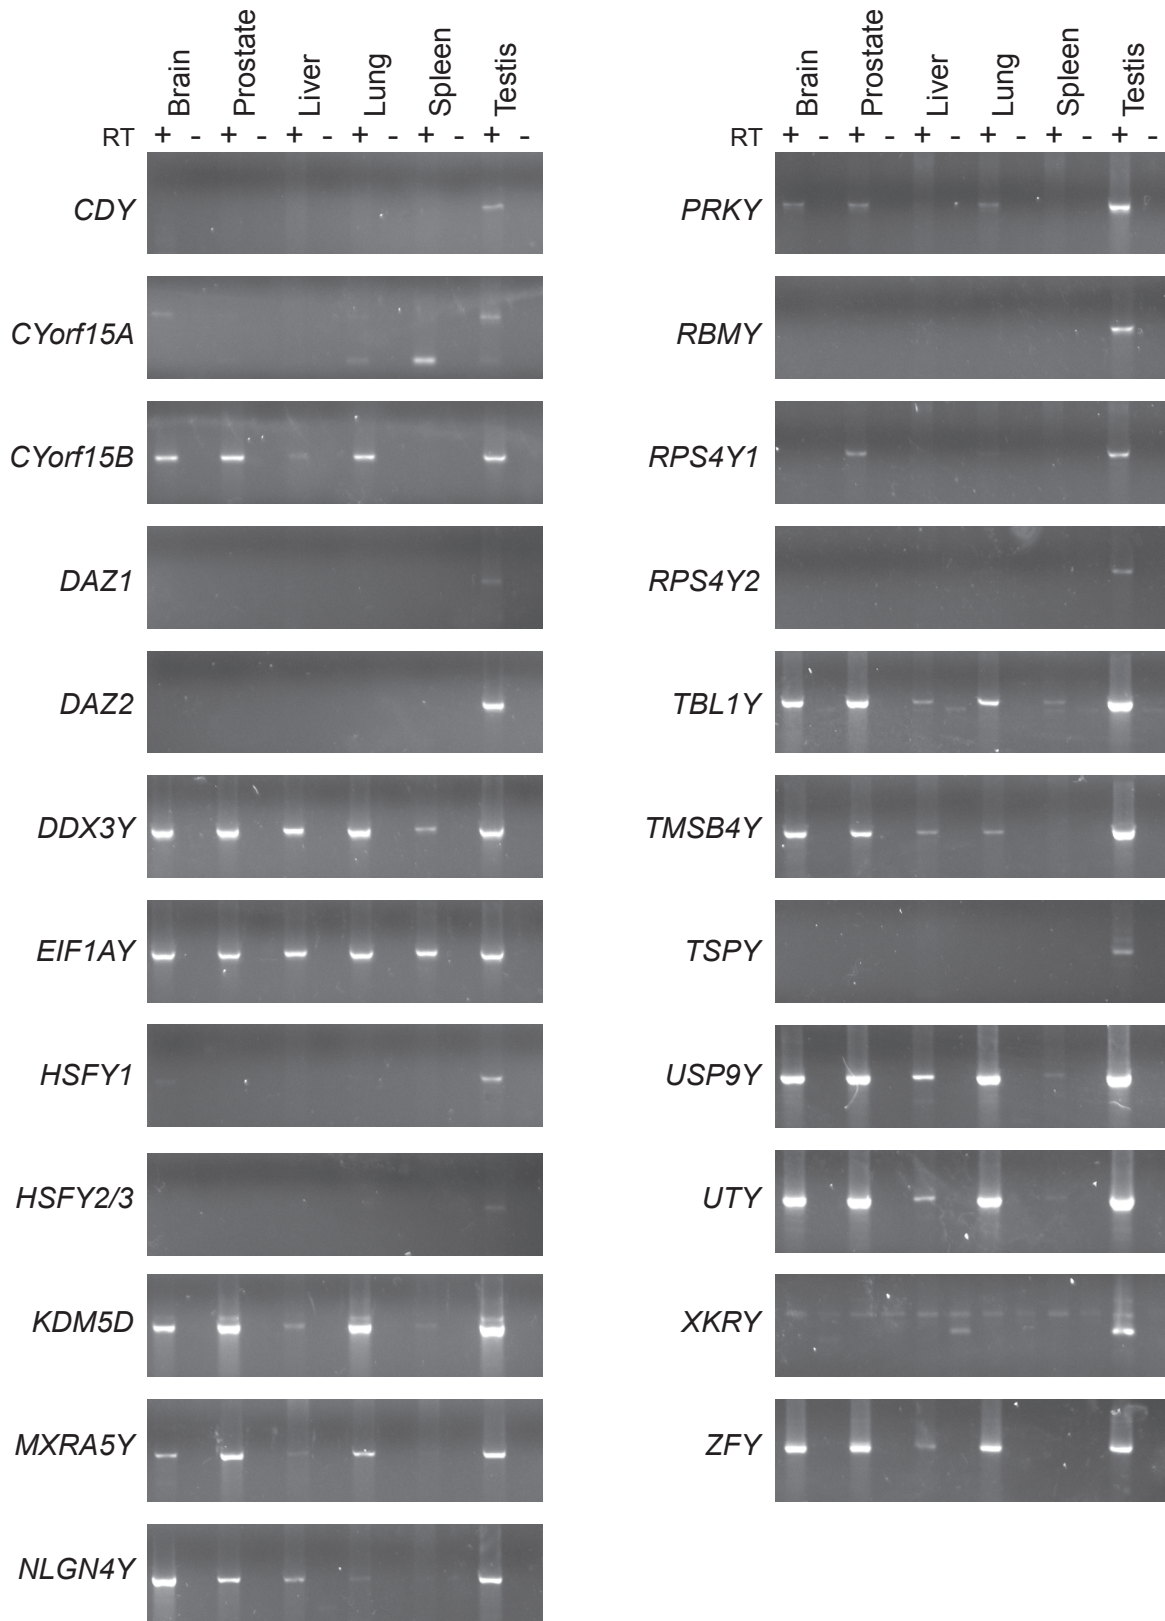

**Supplementary Figure 14** RT-PCR analysis of rhesus MSY genes. Rhesus tissues were used to isolate RNA for cDNA generation: reactions were performed in parallel in the presence or absence of reverse transcriptase (RT). PCR products were sequenced to confirm their identity. Primer sequences and product sizes are listed in Supplementary Table 8. We were not able to detect transcription of *AMELY* and *SRY* in the tissues tested. Expression of these genes in human is restricted to tooth enamel and embryonic testes, respectively.

*GPR143* vs. *GPR143P* (Stratum 4)

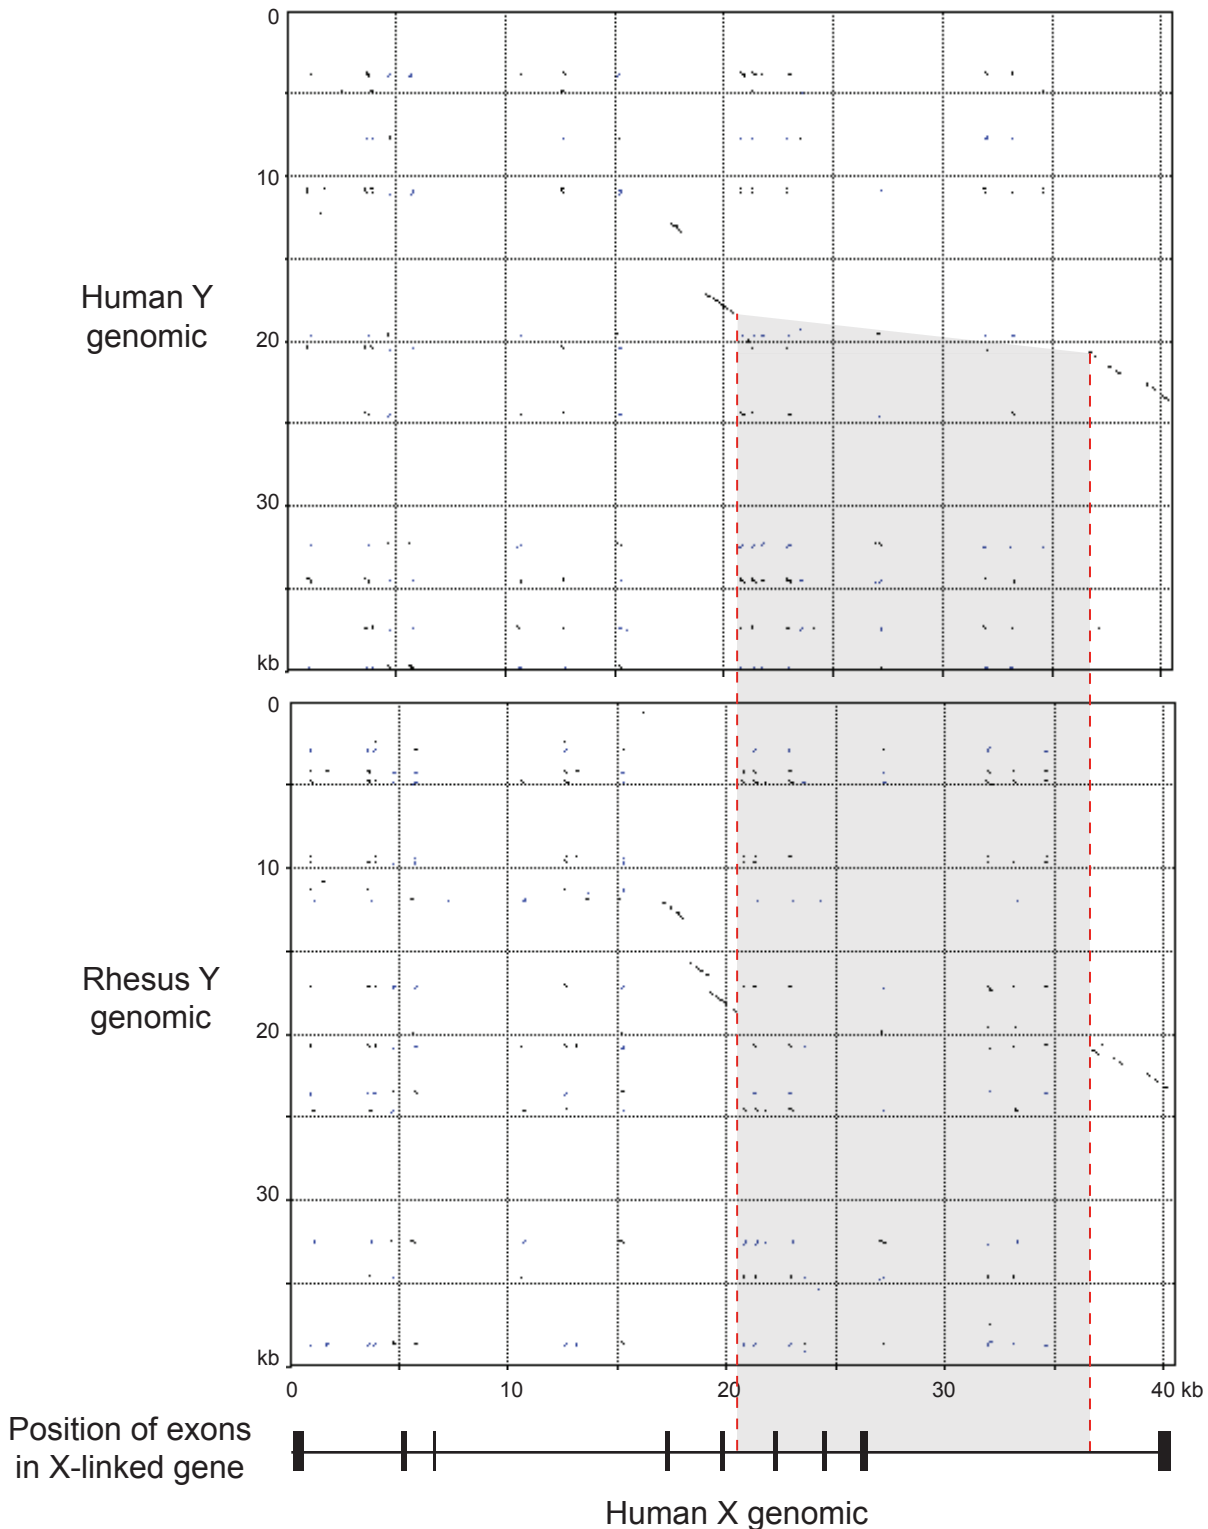

**Supplementary Figure 15a** Analysis of MSY ancestral pseudogenes in rhesus and human. Y-linked *GPR143P* vs. X-linked *GPR143* dot-plot analyses. On X-axis, human *GPR143* genomic sequence. Exon-intron structure of gene is depicted below. On Y-axes, genomic Y sequence from human (top) and rhesus (bottom). For each plot, a dot represents 70% identity within a 100-bp window. *GPR143P* is a stratum 4 pseudogene. One large deletion removing exons 6-8 is common in human and rhesus (deleted region shaded, boundaries indicated by red-dotted lines), indicating inactivation prior to OWM-ape split. Pattern in chimpanzee is nearly identical to that in human (not shown).

*STS vs. STSP (Stratum 4)*

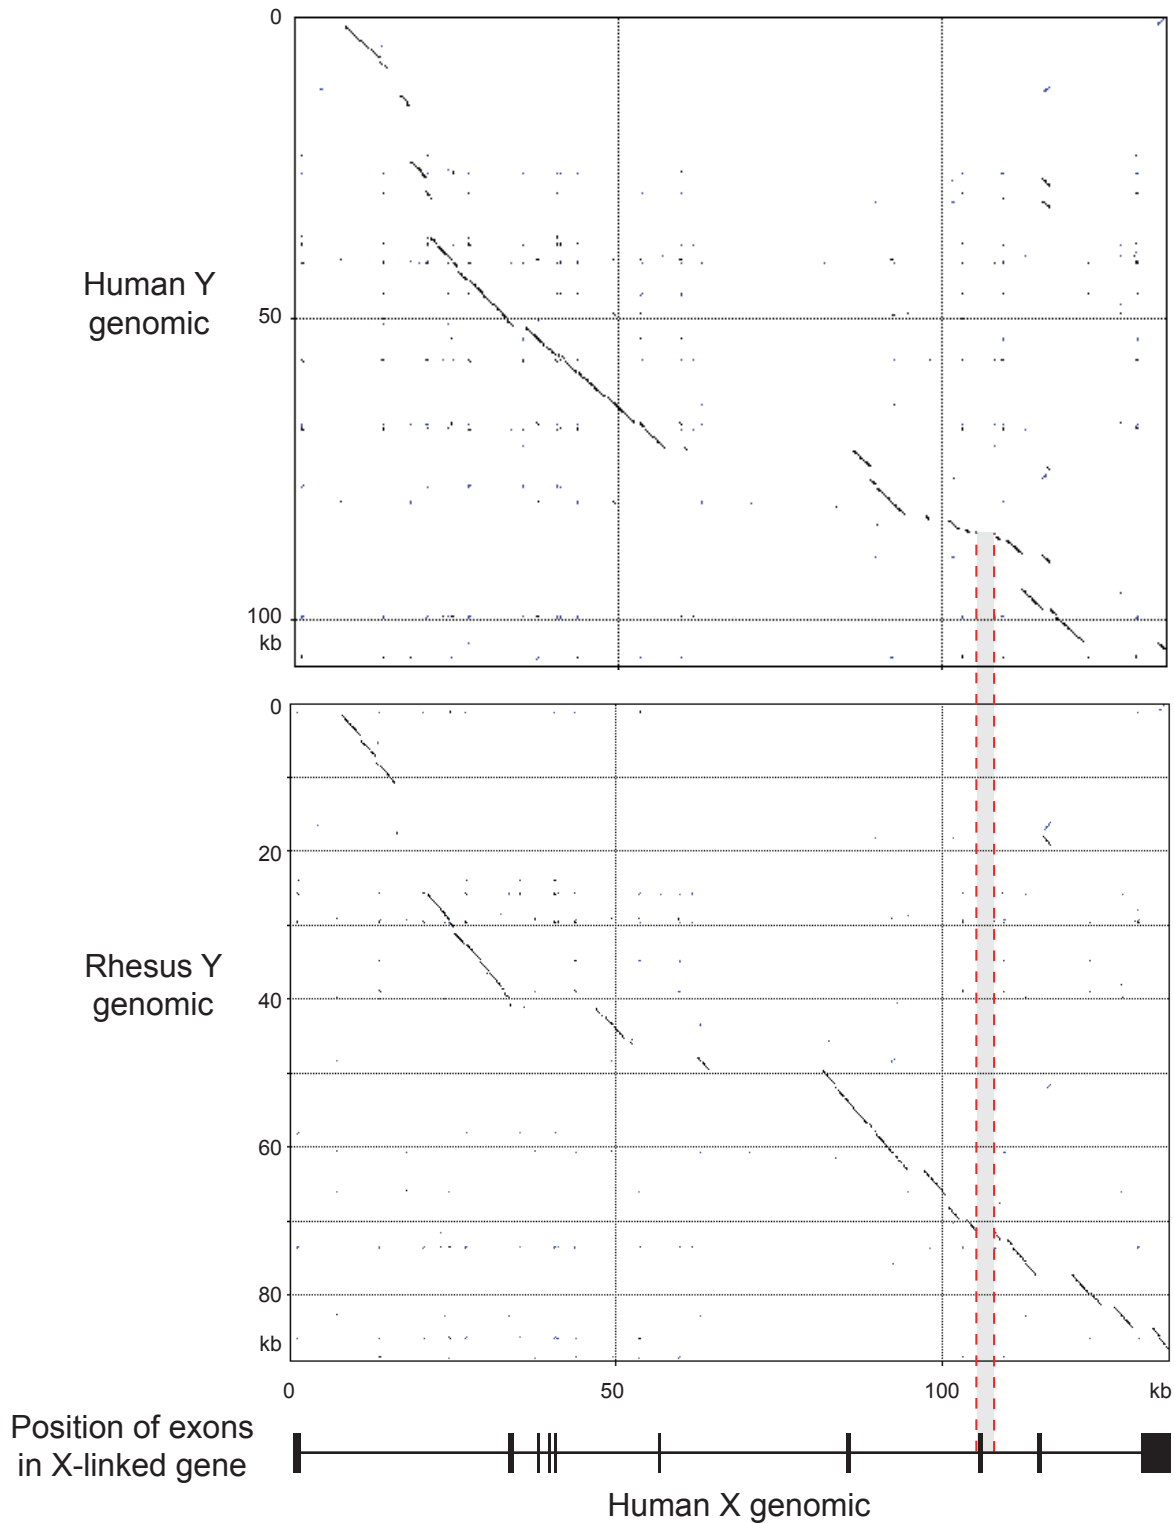

**Supplementary Figure 15b** Analysis of MSY ancestral pseudogenes in rhesus and human. Y-linked *STSP* vs. X-linked *STS* dot-plot analyses. On X-axis, human *STS* genomic sequence. Exon-intron structure of gene is depicted below. On Y-axes, genomic Y sequence from human (top) and rhesus (bottom). For each plot, a dot represents 70% identity within a 100-bp window. *STSP* is a stratum 4 pseudogene. One deletion removing exon 8 (causing a frameshift and truncation of >200 amino acids in encoded protein) is common in human and rhesus (deleted region shaded, boundaries indicated by red dotted lines), indicating inactivation prior to OWM-ape split. Pattern in chimpanzee is nearly identical to that in human (not shown).

### *KAL* vs. *KALP* (Stratum 4)

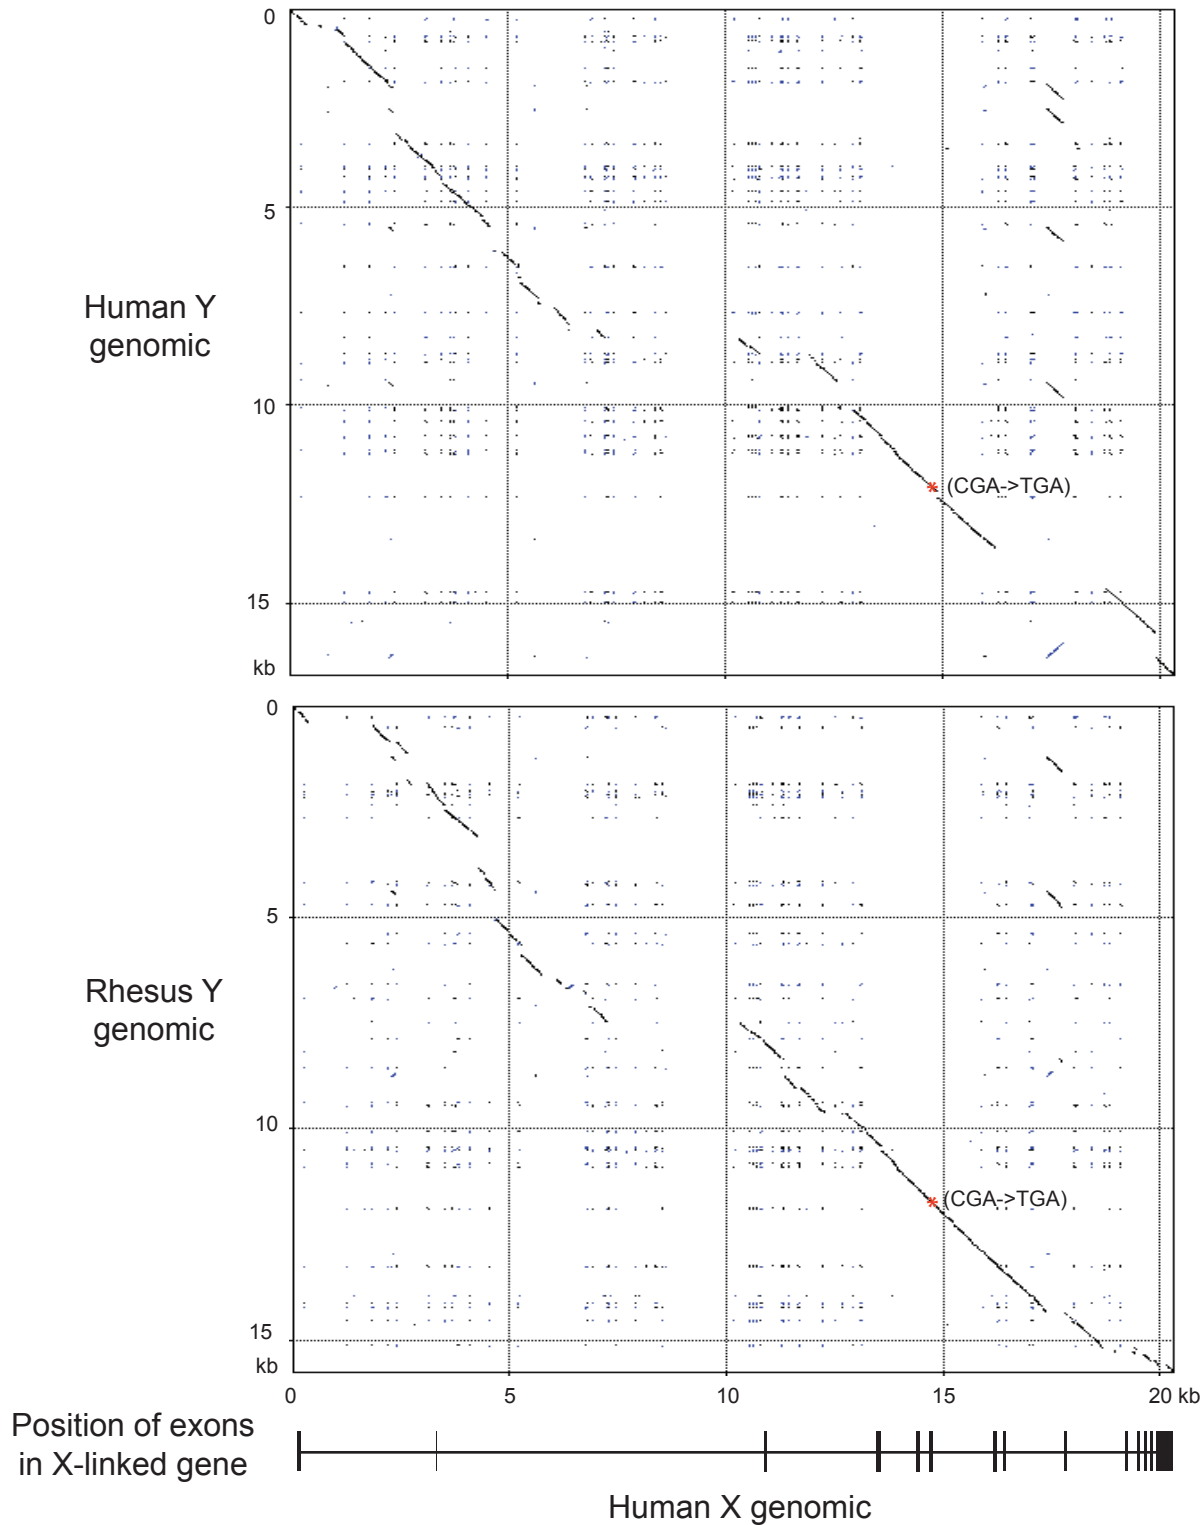

**Supplementary Figure 15c** Analysis of MSY ancestral pseudogenes in rhesus and human. Y-linked *KALP* vs. X-linked *KAL* dot-plot analyses. On X-axis, human *KAL* genomic sequence. Exon-intron structure of gene is depicted below. On Y-axes, genomic Y sequence from human (top) and rhesus (bottom). For each plot, a dot represents 70% identity within a 100-bp window. *KALP* is a stratum 4 pseudogene. One premature stop mutation (truncates encoded protein by >400 amino acids) is common in human and rhesus (position indicated by red asterisk), indicating inactivation prior to OWM-ape split. Pattern in chimpanzee is nearly identical to that in human (not shown).

*SHROOM2* vs. *SHROOM2P* (Stratum 4)

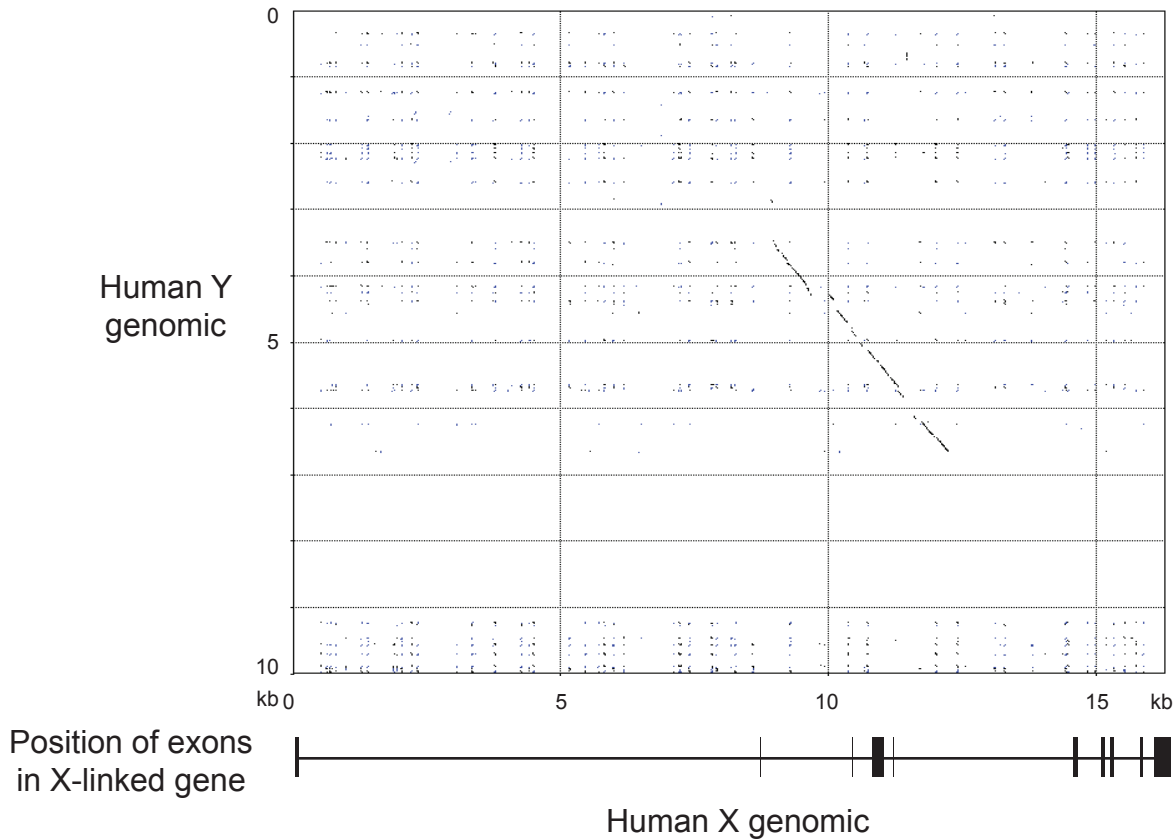

**Supplementary Figure 15d** Analysis of MSY ancestral pseudogenes in human. Y-linked *SHROOM2P* vs. X-linked *SHROOM2* dot-plot analysis. On X-axis, human *SHROOM2* genomic sequence. Exon-intron structure of gene is depicted below. On Y-axis, genomic Y sequence from human (pseudogene is deleted in rhesus). A dot represents 70% identity within a 100-bp window. *SHROOM2P* is a stratum 4 pseudogene, and is highly degenerated compared to its X homolog (to an even greater extent than other Stratum 4 pseudogenes -- Supplementary Figures 15a-c), indicating that inactivation likely occurred prior to OWM-ape split. Pattern in chimpanzee is nearly identical to that in human (not shown).

*BCOR* vs. *BCORP* (Stratum 3)

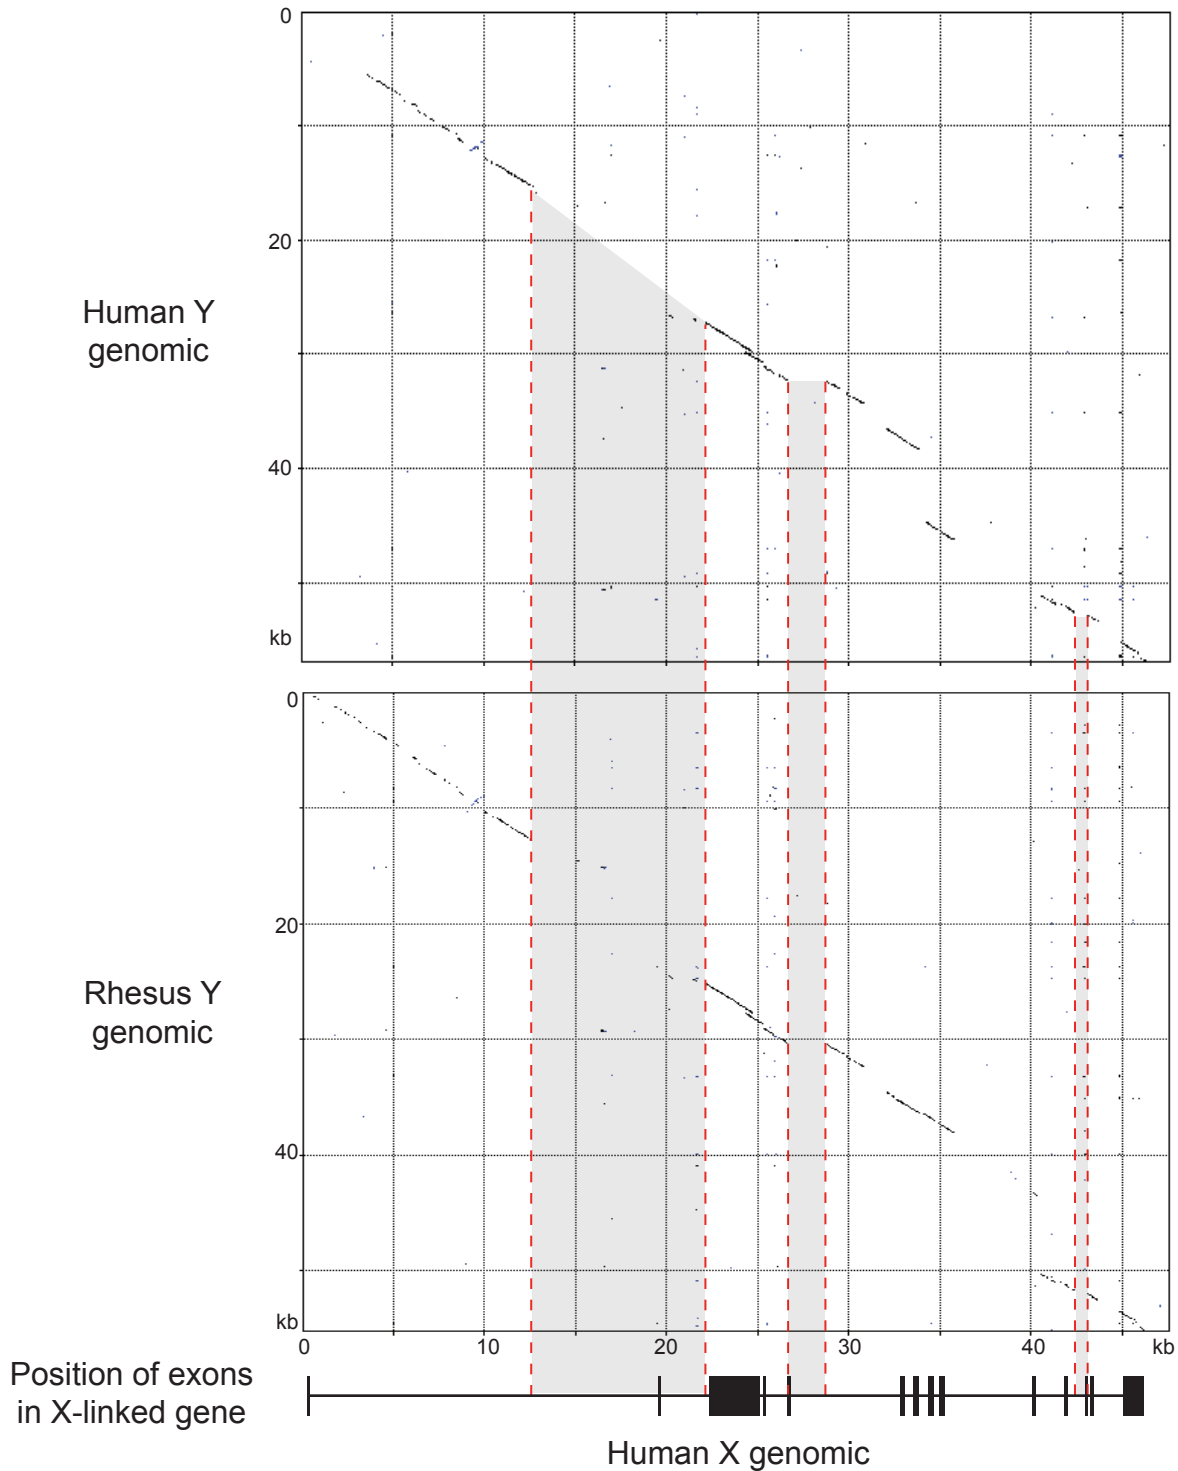

**Supplementary Figure 15e** Analysis of MSY ancestral pseudogenes in rhesus and human. Y-linked *BCORP* vs. X-linked *BCOR* dot-plot analyses. On X-axis, human *BCOR* genomic sequence. Exon-intron structure of gene is depicted below. On Y-axes, genomic Y sequence from human (top) and rhesus (bottom). For each plot, a dot represents 30% identity within a 60-bp window. *BCORP* is a highly diverged stratum 3 pseudogene. Several deletions removing or disrupting exons are common in human and rhesus (deleted regions shaded, boundaries indicated by red-dotted lines), indicating inactivation prior to OWM-ape split. Pattern in chimpanzee is nearly identical to that in human (not shown).



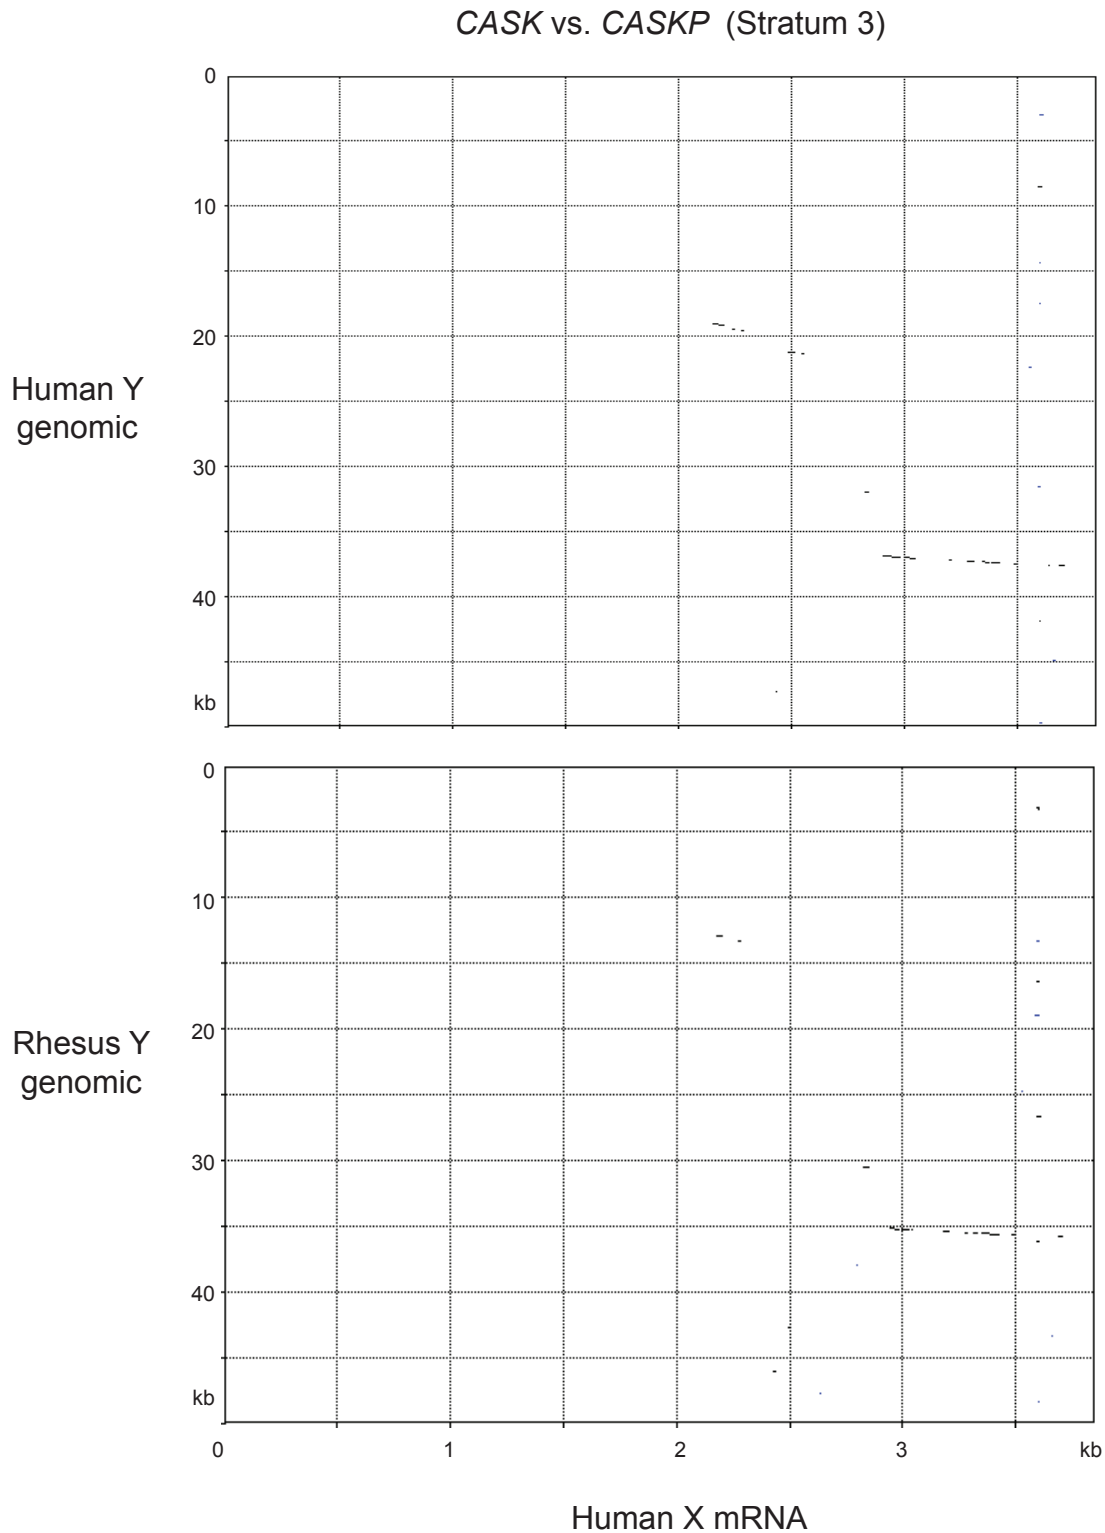

**Supplementary Figure 15f** Analysis of MSY ancestral pseudogenes in rhesus and human. Y-linked *CASKP* vs. X-linked *CASK* dot-plot analyses. On X-axis, human *CASK* mRNA sequence (if genomic sequence is used, X-Y identities are very difficult to visualize). On Y-axes, genomic Y sequence from human (top) and rhesus (bottom). For each plot, a dot represents 30% identity within a 60-bp window. *CASKP* is a highly diverged stratum 3 pseudogene. Overall divergence patterns in human and rhesus are similar, indicating inactivation prior to OWM-ape split. Pattern in chimpanzee is nearly identical to that in human (not shown).

**Supplementary Figure 16** Sliding-window analyses for rhesus-human ancestral gene pairs. For each ancestral gene, translated ORF sequences for rhesus and human were aligned using stretcher (<http://emboss.sourceforge.net>) with gap-open penalty of 20 and gap-extend penalty of 1. Resulting amino-acid alignments were used to convert corresponding rhesus and human mRNA sequences into codon alignments using PAL2NAL (<http://www.bork.embl.de/pal2nal>). A custom perl code was used to implement the CODEML program in PAML to calculate dN/dS ratios over a sliding window with a 3-bp step. Coding sequence (CDS) length determined window size: if CDS < 500 bp, window size = 150 bp; if CDS > 500 bp, window size = 300 bp. dN/dS values for each gene as a whole are given in Supplementary Table 3.

# Supplementary Figure 16

*AMELY* window size = 150 bp

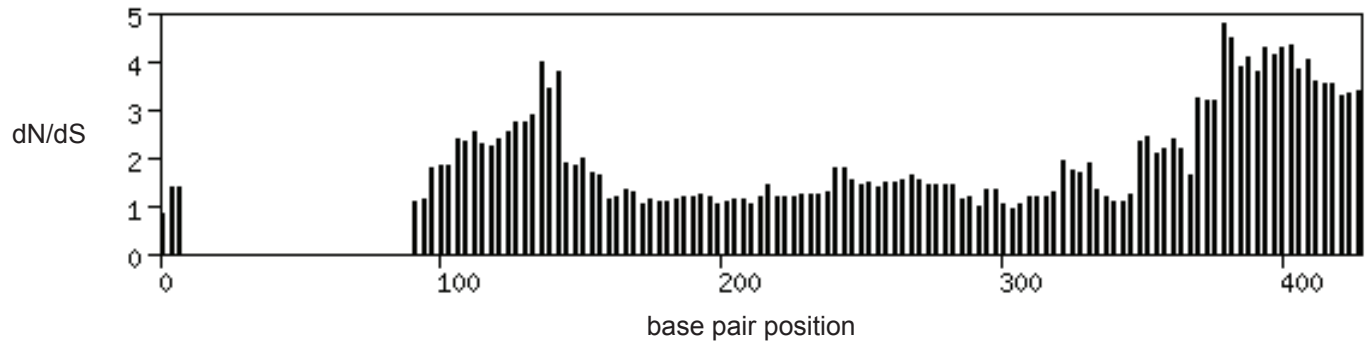

*CYorf15a* window size = 150 bp

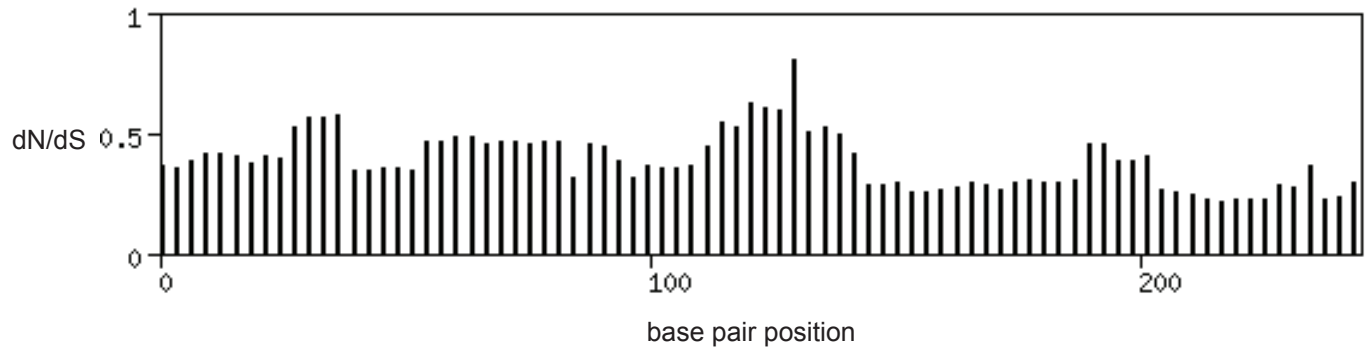

*CYorf15b* window size = 150 bp

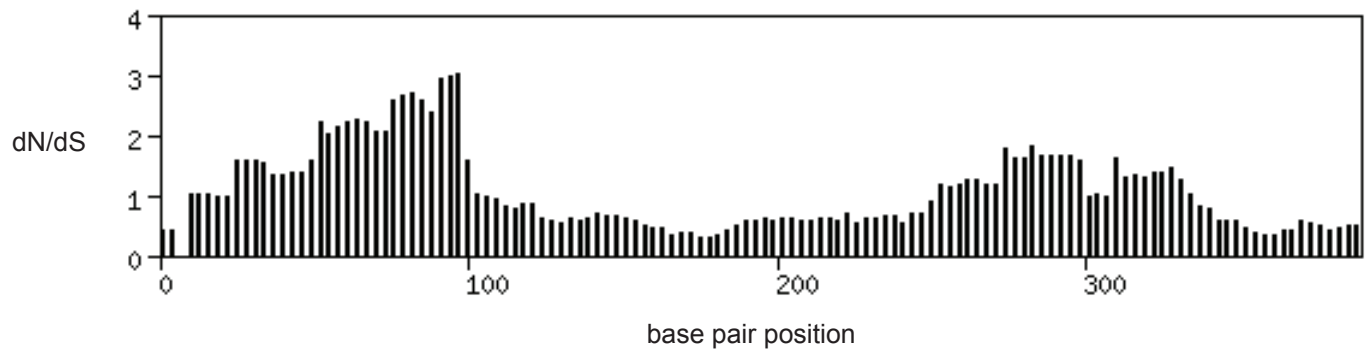

*DDX3Y* window size = 300 bp

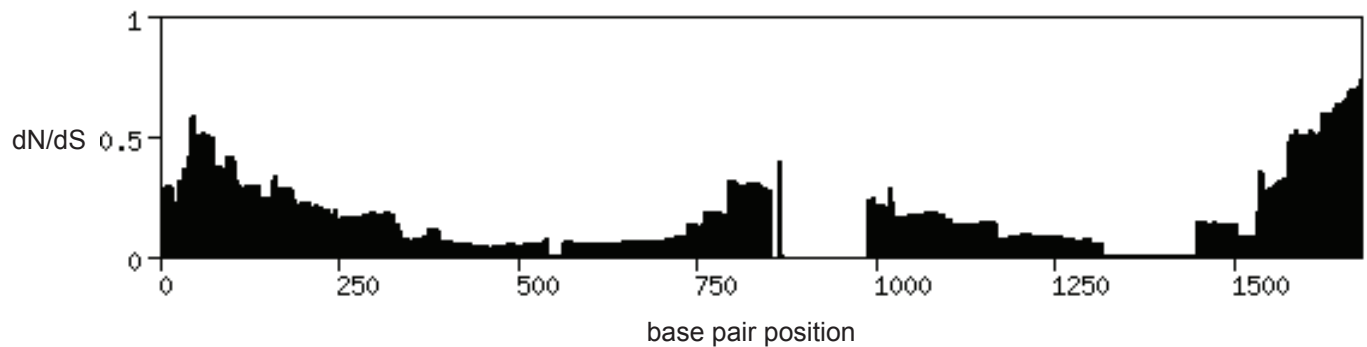

Supplementary Figure 16

*EIF1AY* window size = 150 bp

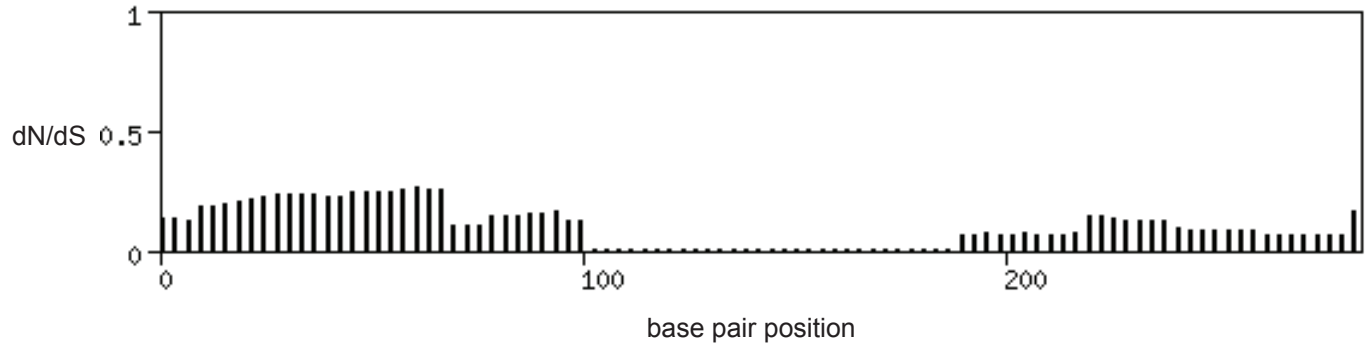

*HSFY* window size = 300 bp

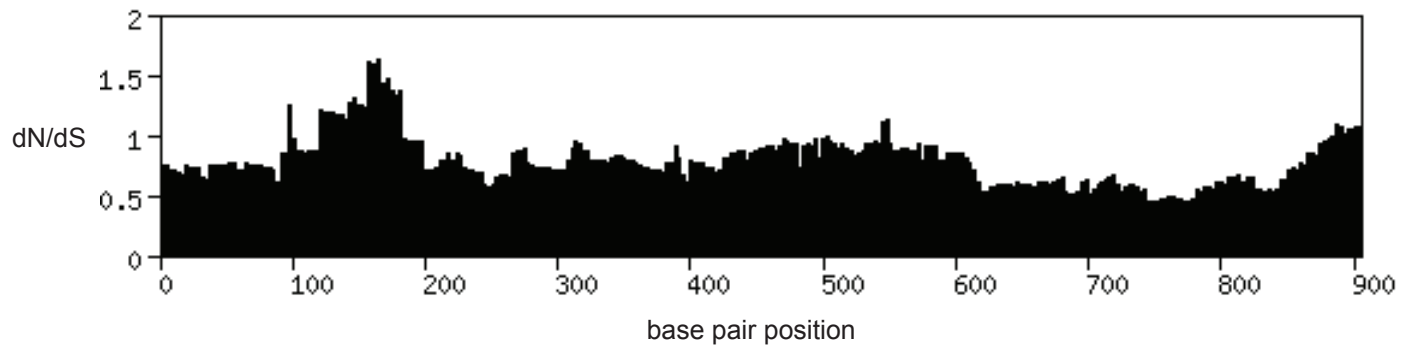

*KDM5D* window size = 300 bp

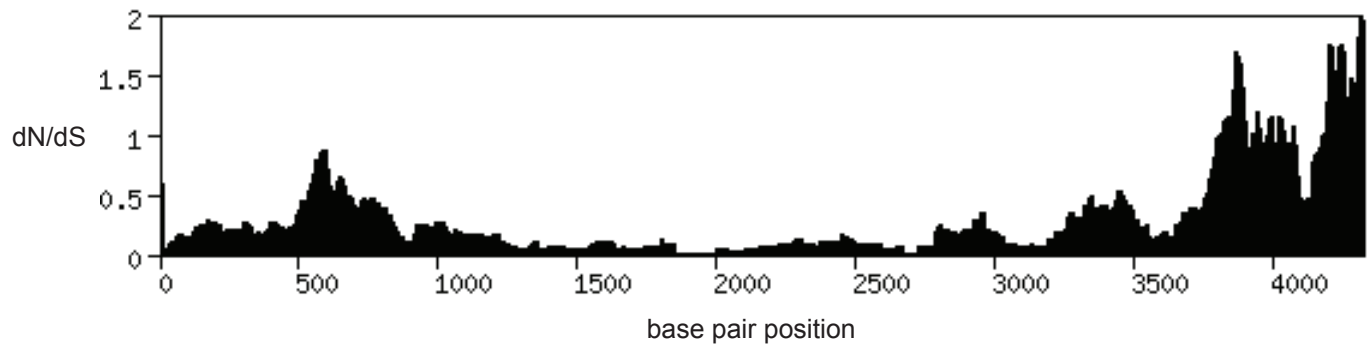

*MXRA5Y* window size = 300 bp

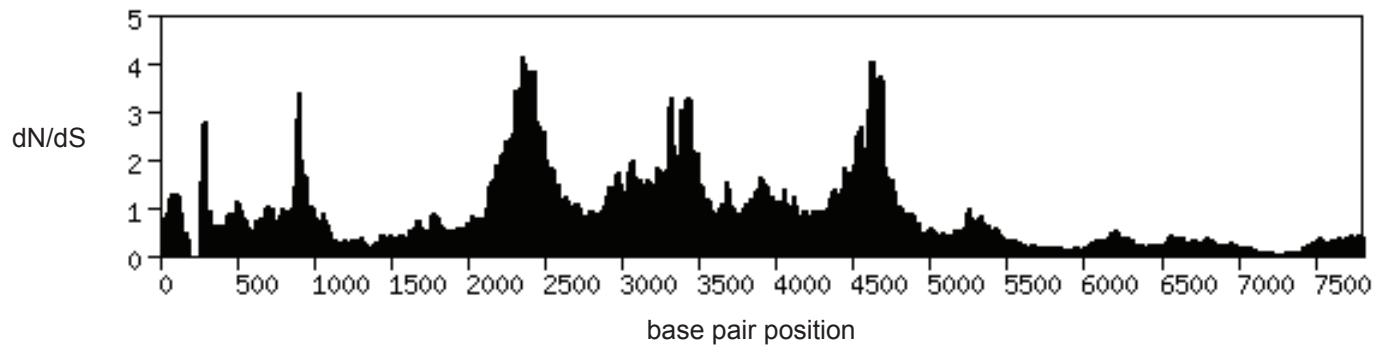

Supplementary Figure 16

*NLGN4Y* window size = 300 bp

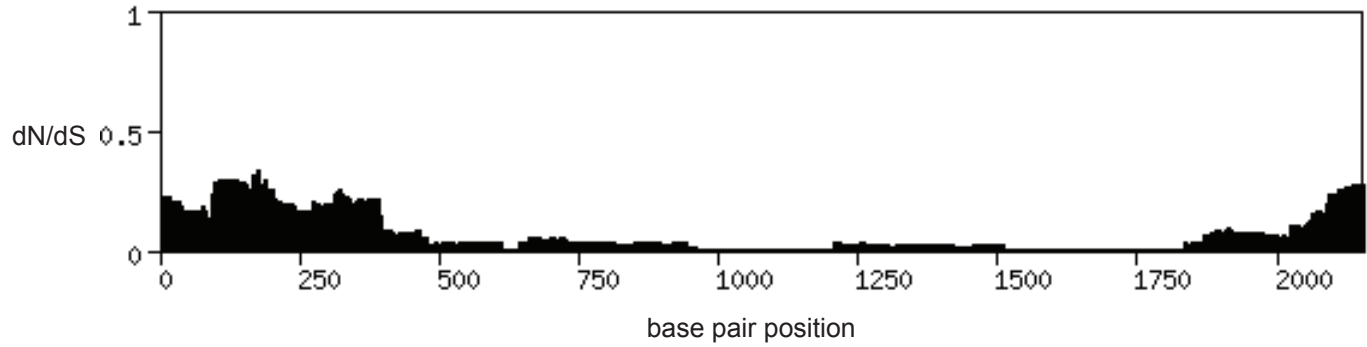

*PRKY* window size = 300 bp

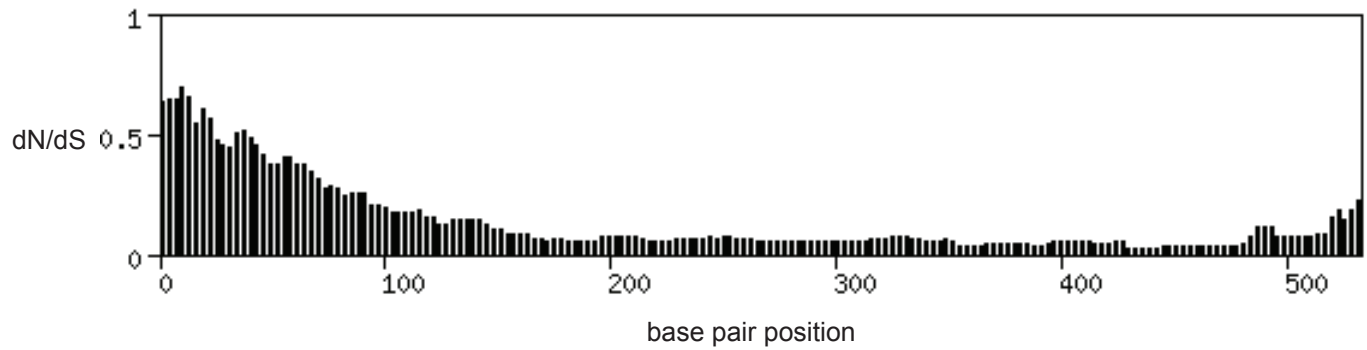

*RBMV* window size = 300 bp

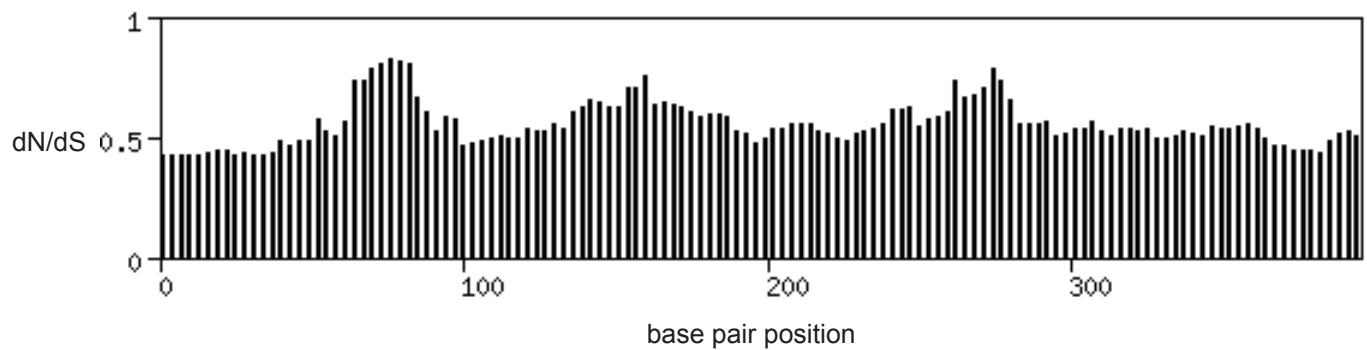

*RPS4Y1* window size = 300 bp

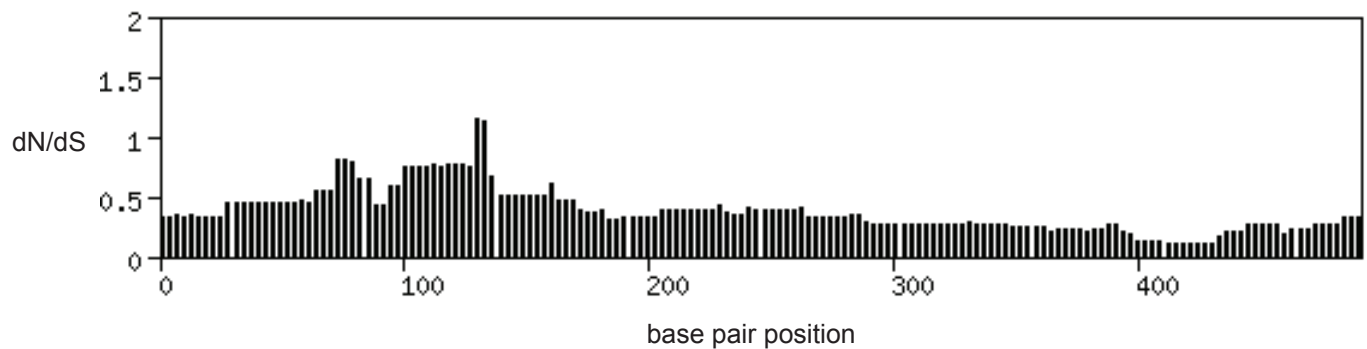

Supplementary Figure 16

*RPS4Y2* window size = 300 bp

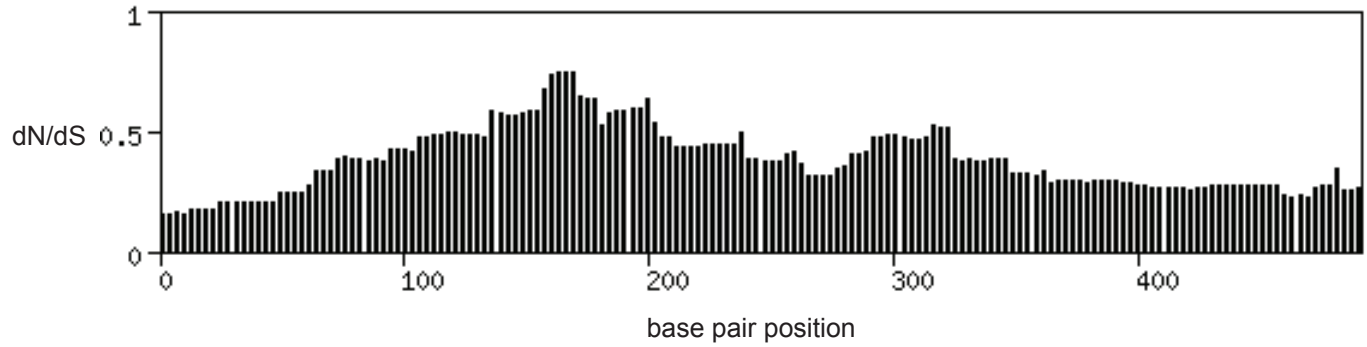

*SRY* window size = 150 bp

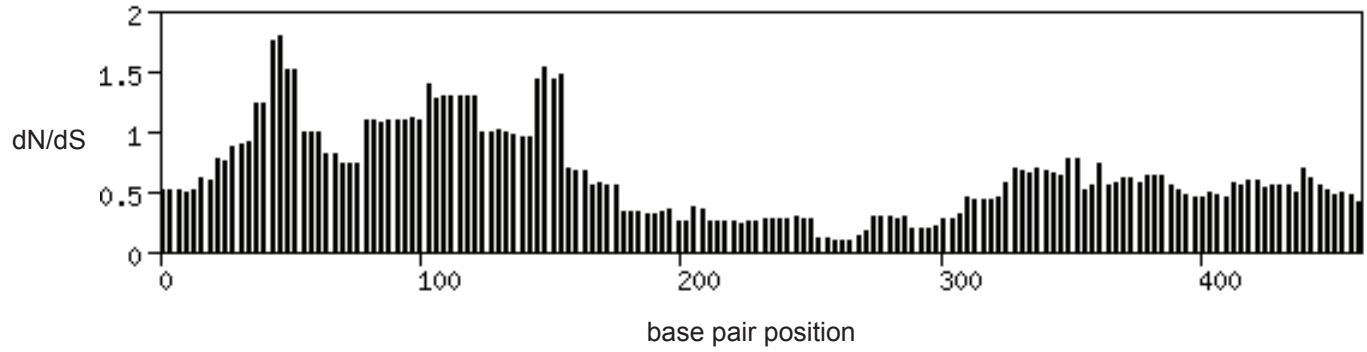

*TBL1Y* window size = 300 bp

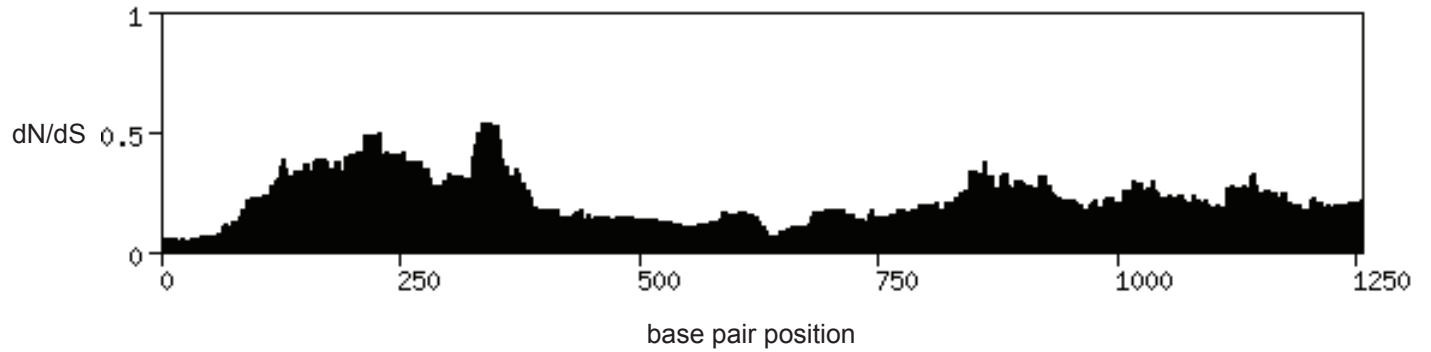

*TSPY* window size = 150 bp

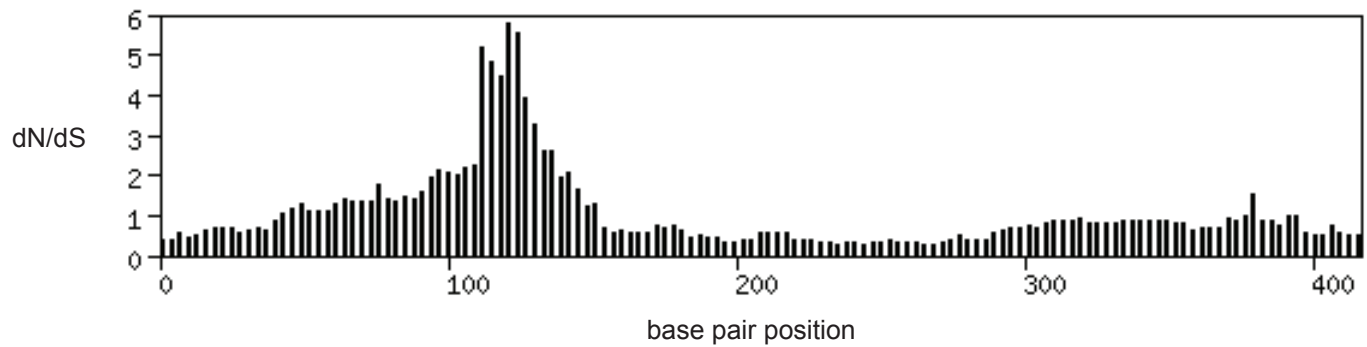

# Supplementary Figure 16

*USP9Y* window size = 300 bp

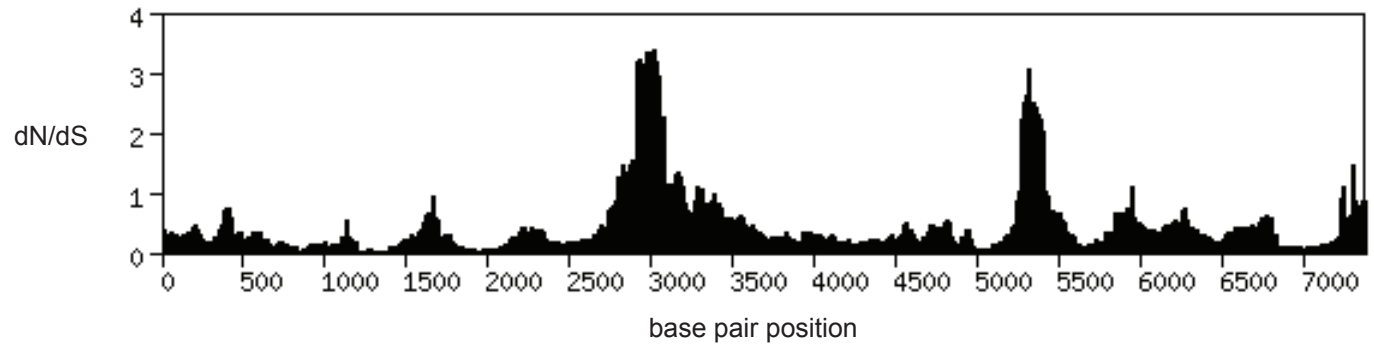

*UTY* window size = 300 bp

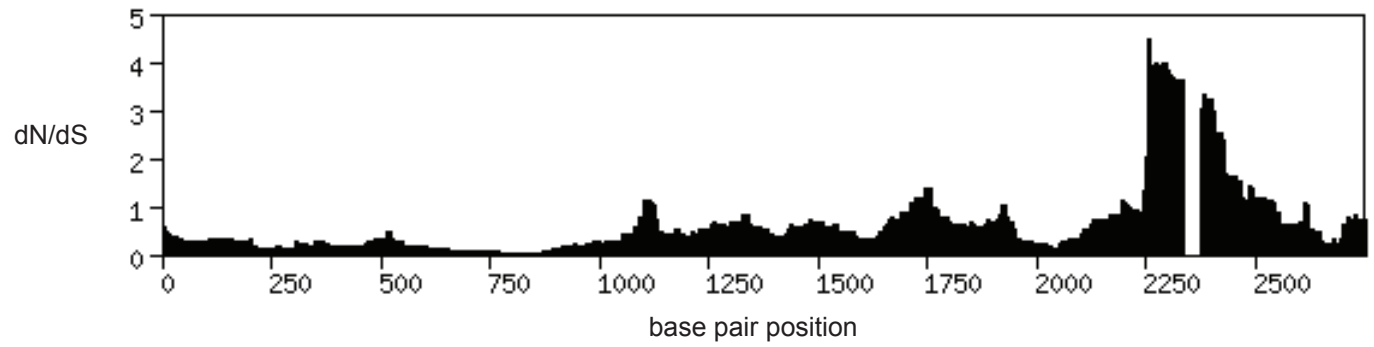

*ZFY* window size = 300 bp

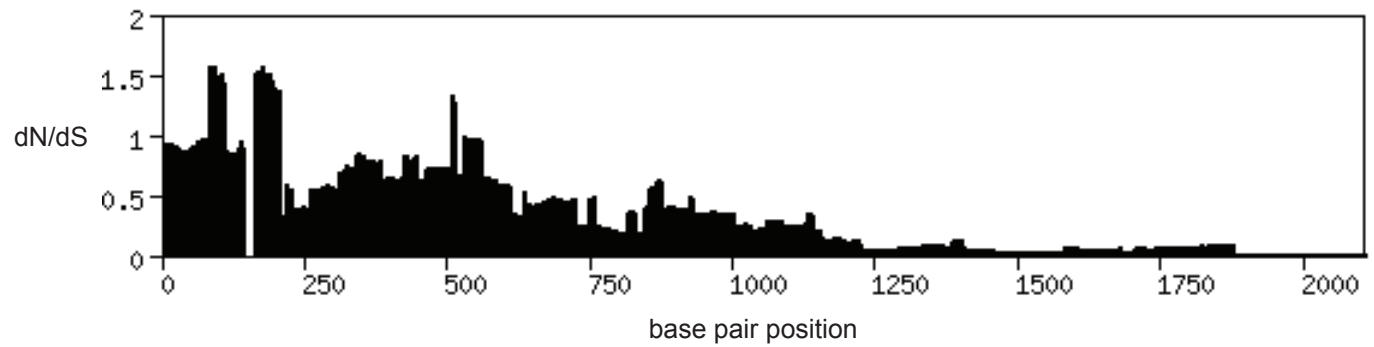

### *MXRA5P/Y* (Stratum 5)

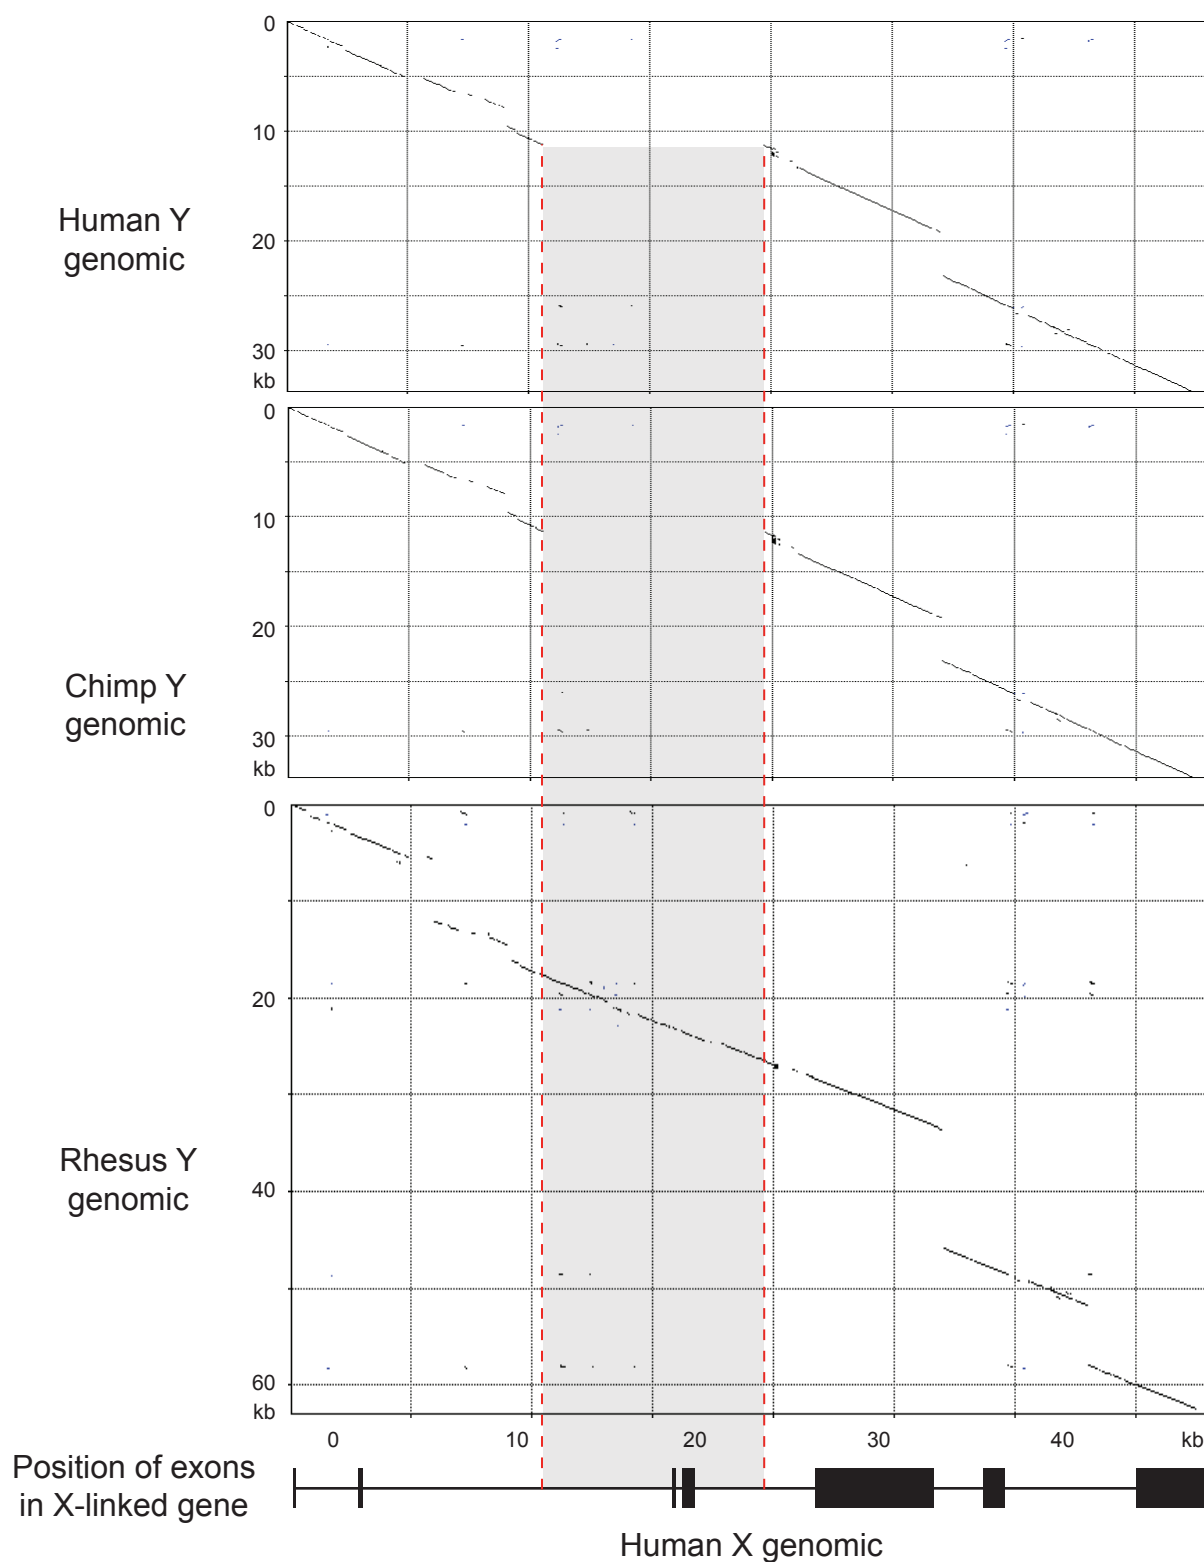

**Supplementary Figure 17** Y-linked *MXRA5P/Y* vs. X-linked *MXRA5* dot-plot analyses in rhesus, human and chimpanzee. On X-axis, human *MXRA5* genomic sequence. Exon-intron structure of gene is depicted below. On Y-axes, genomic Y sequence from human (top), chimpanzee (middle), and rhesus (bottom). For each plot, a dot represents 70% identity within a 100-bp window. One deletion removing exons 4 and 5 (causing a truncation of >160 amino acids in the encoded protein) is common in human and chimpanzee (deleted region shaded, boundaries indicated by red dotted lines), but corresponding region is intact in rhesus MSY, indicating inactivation after OWM-ape split but prior to human-chimpanzee split.



**Supplementary Figure 18** Gene decay plots using alternative dates. Minimum (a) and maximum (b) estimations for strata formation dates and lineage divergence dates (given in table below) were used to fit curves using the same method as in Figure 3. Strata date ranges are from main text references 2 and 3. Lineage divergence date ranges are from <http://www.timetree.org>.

|                             | Minimum date<br>(millions of years ago) | Maximum date<br>(millions of years ago) |
|-----------------------------|-----------------------------------------|-----------------------------------------|
| Stratum 1 formation         | 240                                     | 320                                     |
| Stratum 2 formation         | 130                                     | 170                                     |
| Stratum 3 formation         | 80                                      | 130                                     |
| Stratum 4 formation         | 38                                      | 44                                      |
| Stratum 5 formation         | 29                                      | 32                                      |
| Rhesus/human/chimp ancestor | 21.6                                    | 38.1                                    |
| Human/chimp ancestor        | 4                                       | 8.4                                     |

Supplementary Figure 18a

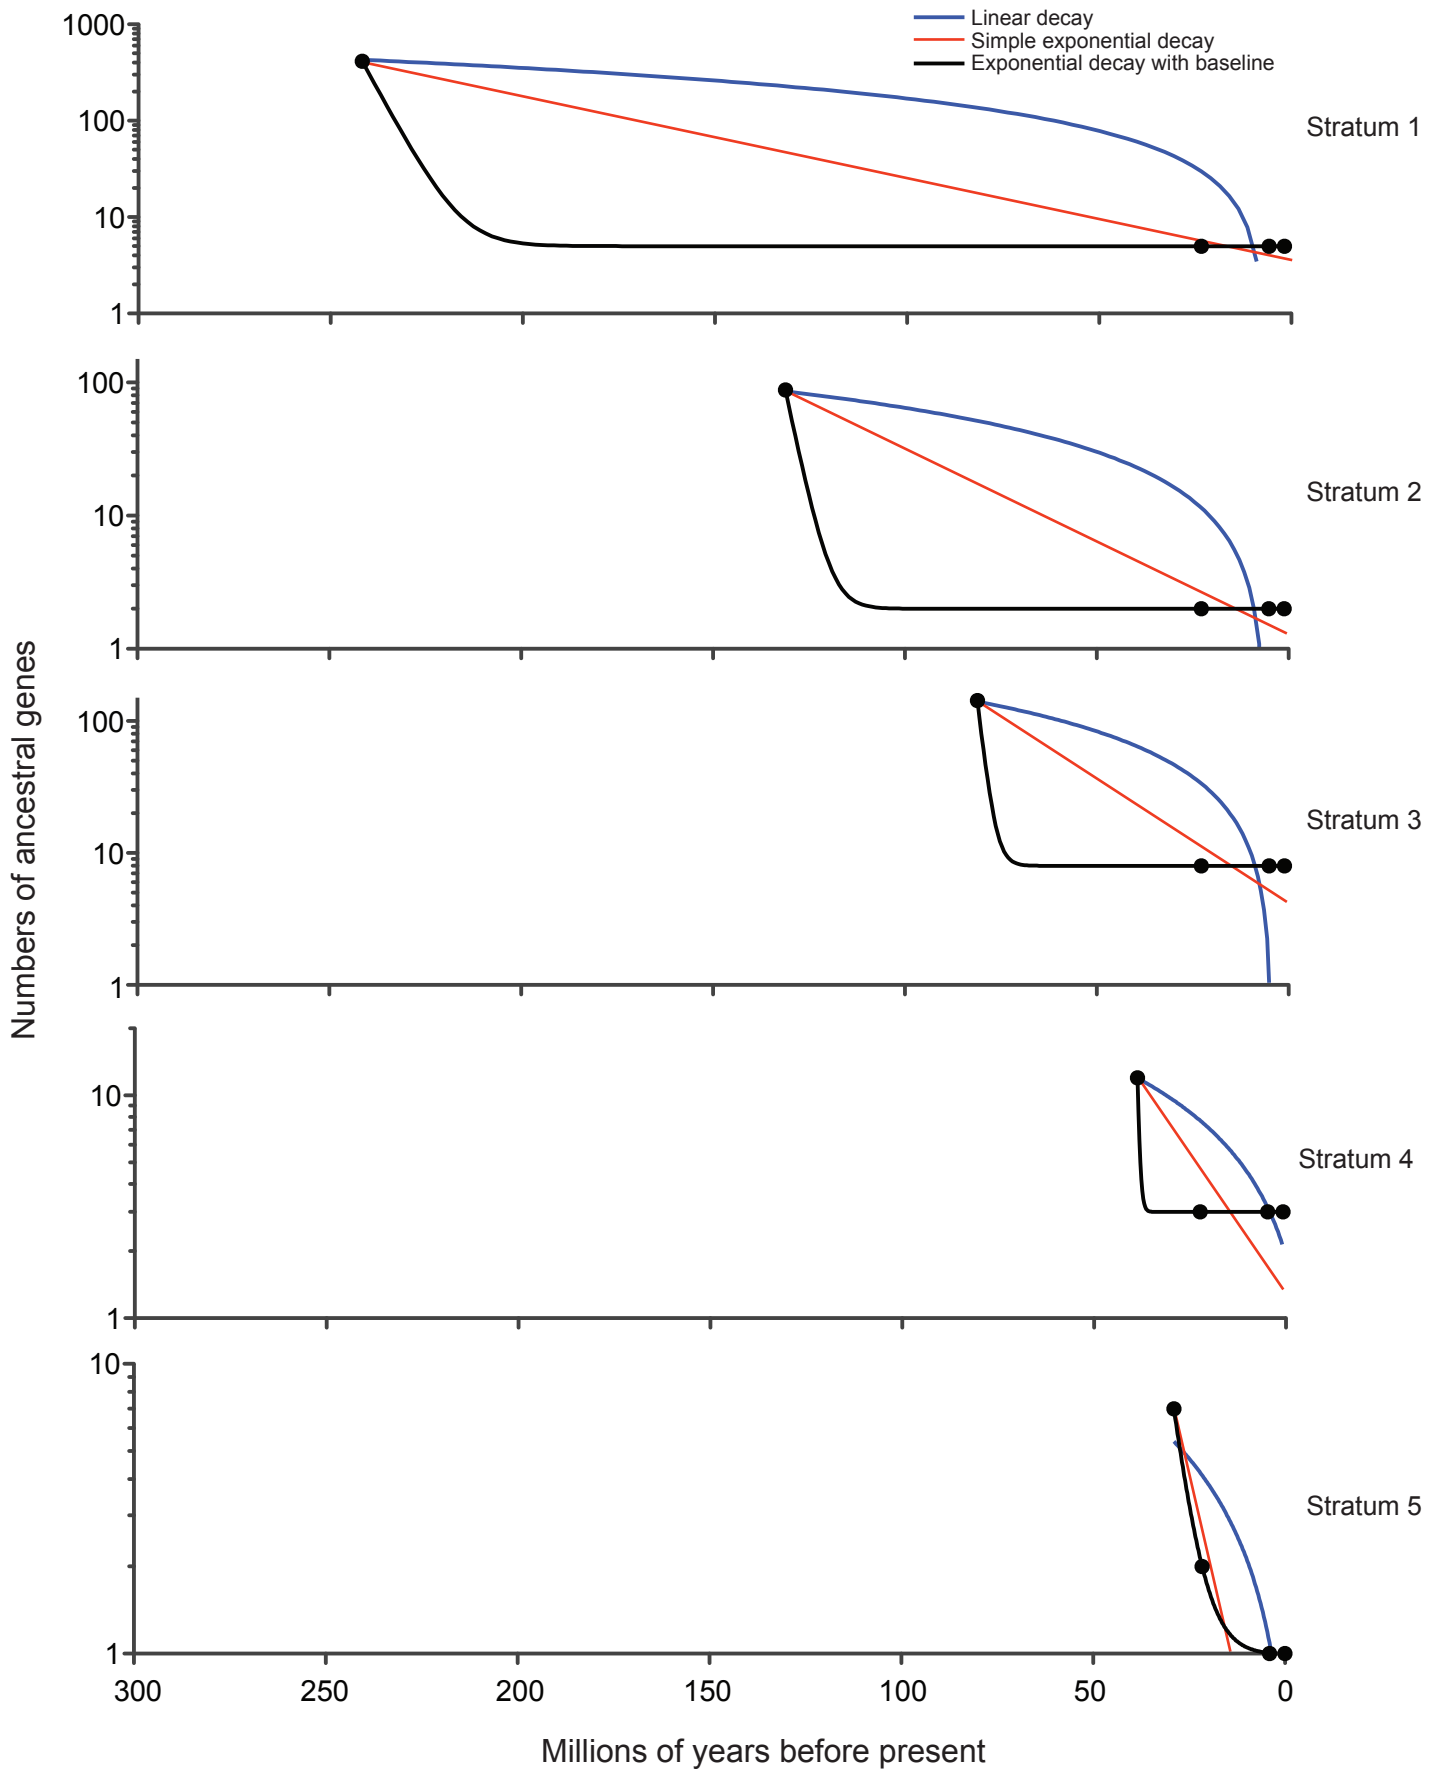

Supplementary Figure 18b

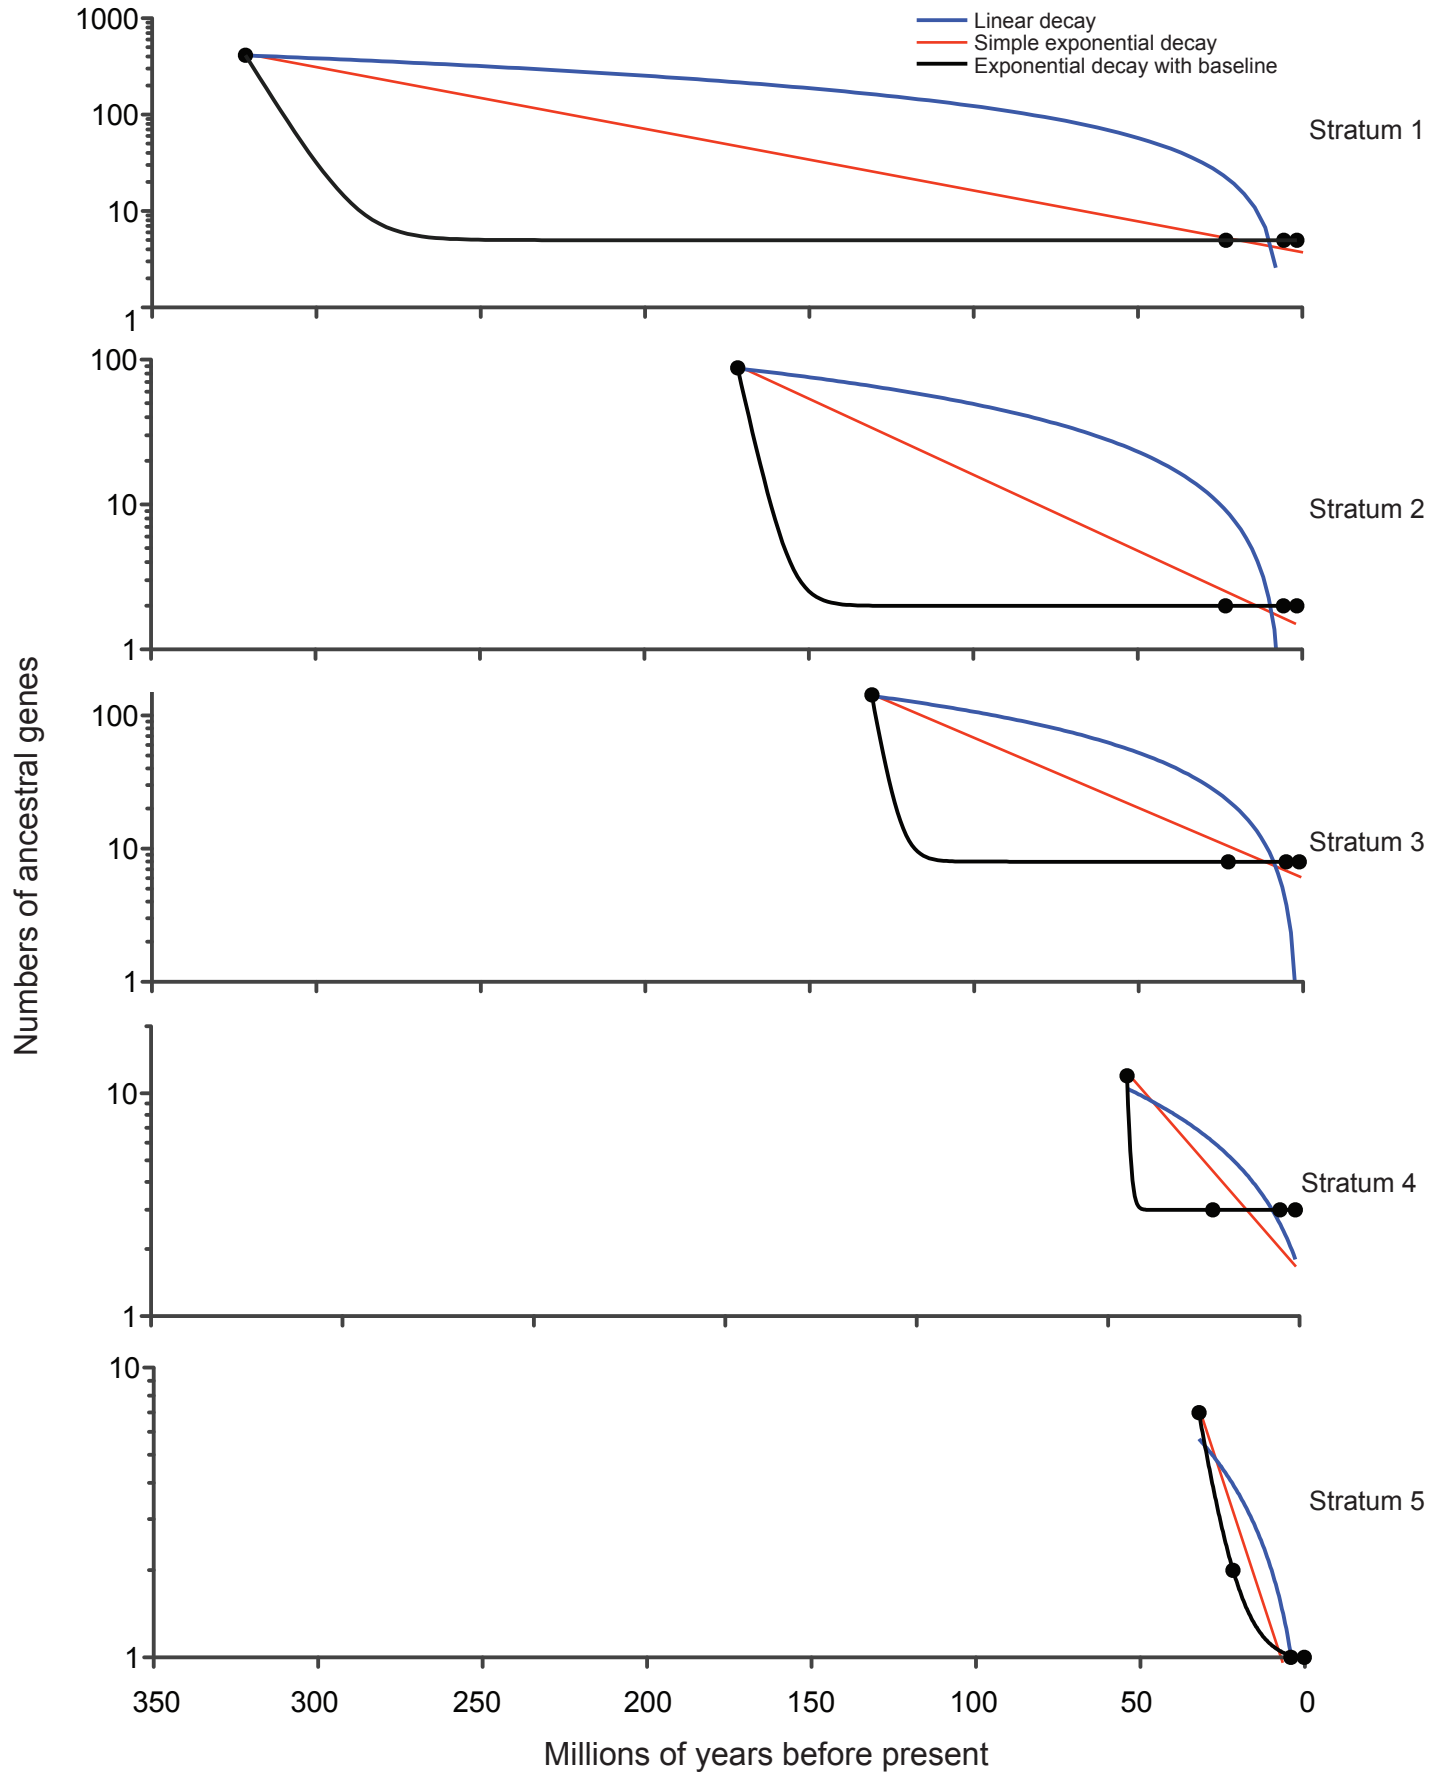

Supplementary Table 1. BAC clones, GenBank accession numbers and nucleotide positions in rhesus MSY sequence assembly

| BAC name     | GenBank accession number | Start position | End position |
|--------------|--------------------------|----------------|--------------|
| CH250-228N17 | AC217136                 | 1              | 207268       |
| CH250-57C20  | AC217135                 | 133076         | 325216       |
| CH250-234C9  | AC218138                 | 322828         | 501380       |
| CH250-536L15 | AC209790                 | 431875         | 584730       |
| CH250-7H7    | AC225167                 | 512927         | 663373       |
| CH250-133J8  | AC208953                 | 586819         | 782238       |
| CH250-441E9  | AC207029                 | 730115         | 876799       |
| CH250-387J10 | AC233579                 | 864994         | 1013294      |
| CH250-421L9  | AC209415                 | 892911         | 1069757      |
| CH250-236O3  | AC215551                 | 1046643        | 1230612      |
| CH250-352P1  | AC209450                 | 1076356        | 1242918      |
| CH250-308C23 | AC209448                 | 1197004        | 1352770      |
| CH250-392D8  | AC232277                 | 1280648        | 1422345      |
| CH250-567J10 | AC232812                 | 1418007        | 1578821      |
| CH250-348G18 | AC225626                 | 1477163        | 1632288      |
| CH250-123M13 | AC214072                 | 1579682        | 1743196      |
| CH250-262A6  | AC213330                 | 1658191        | 1842010      |
| CH250-127G4  | AC206102                 | 1752845        | 1943979      |
| CH250-56H16  | AC206891                 | 1925142        | 2091810      |
| CH250-541A11 | AC213321                 | 2035026        | 2191714      |
| RMAEX-106G5  | AC237431                 | 2068941        | 2238849      |
| CH250-106J9  | AC213381                 | 2215041        | 2384793      |
| CH250-6J16   | AC212894                 | 2324975        | 2515799      |
| CH250-393D12 | AC212004                 | 2427003        | 2593199      |
| CH250-265J16 | AC217134                 | 2557979        | 2729056      |
| CH250-277C1  | AC212744                 | 2702320        | 2894742      |
| CH250-369H16 | AC217132                 | 2847613        | 3006214      |
| CH250-438I12 | AC212027                 | 2943049        | 3067481      |
| CH250-127L17 | AC212387                 | 2970977        | 3146470      |
| CH250-311C6  | AC218137                 | 3070618        | 3248221      |
| CH250-523J16 | AC233736                 | 3209673        | 3350882      |
| CH250-99J18  | AC205186                 | 3308293        | 3487624      |
| CH250-95C23  | AC213328                 | 3390177        | 3567856      |
| CH250-337J7  | AC206885                 | 3495927        | 3653839      |
| CH250-445I24 | AC207030                 | 3632981        | 3806382      |
| CH250-167G6  | AC215694                 | 3801429        | 3987257      |
| CH250-182M22 | AC206433                 | 3927771        | 4100401      |
| CH250-364B23 | AC207035                 | 4071824        | 4230386      |
| RMAEX-213K20 | AC237222                 | 4194948        | 4340225      |
| CH250-540A18 | AC209796                 | 4299833        | 4462069      |
| CH250-231H12 | AC229687                 | 4460022        | 4656116      |
| CH250-263I4  | AC217137                 | 4628633        | 4869929      |
| CH250-3M7    | AC207616                 | 4802760        | 4999152      |

| BAC name       | GenBank accession number | Start position | End position |
|----------------|--------------------------|----------------|--------------|
| CH250-204D1    | AC225831                 | 4890266        | 5034651      |
| CH250-380I15   | AC217133                 | 5026232        | 5211571      |
| CH250-144P14   | AC205194                 | 5143525        | 5303607      |
| CH250-477E7    | AC225635                 | 5291502        | 5442191      |
| CH250-197K9    | AC225612                 | 5368446        | 5523328      |
| CH250-198P20   | AC215644                 | 5515066        | 5672573      |
| CH250-309A3    | AC215643                 | 5600065        | 5770585      |
| CH250-128N24   | AC215552                 | 5733408        | 5930884      |
| CH250-395B18   | AC215642                 | 5868056        | 6054638      |
| CH250-214L22   | AC217166                 | 5998274        | 6175965      |
| CH250-122N22   | AC215550                 | 6169834        | 6366283      |
| CH250-165P22   | AC206800                 | 6320200        | 6506534      |
| CH250-142O13-2 | AC207049                 | 6444445        | 6629531      |
| CH250-392O18   | AC215553                 | 6604213        | 6767217      |
| CH250-29I18    | AC215641                 | 6619972        | 6795425      |
| CH250-361K18   | AC215549                 | 6769616        | 6921226      |
| CH250-128P23   | AC215640                 | 6771158        | 6960166      |
| CH250-97J21    | AC231831                 | 6859263        | 7014682      |
| RMAEX-230N16   | AC237223                 | 6949034        | 7126320      |
| CH250-542D24   | AC209262                 | 7016219        | 7146999      |
| CH250-463B10   | AC208130                 | 7138967        | 7354612      |
| CH250-164O10   | AC208133                 | 7218549        | 7411027      |
| CH250-351H7    | AC212790                 | 7396859        | 7505560      |
| CH250-182A8    | AC209264                 | 7529592        | 7712304      |
| CH250-477B24   | AC213057                 | 7672571        | 7888031      |
| CH250-374B3    | AC225627                 | 7797384        | 7945558      |
| CH250-209A4    | AC232762                 | 7995862        | 8170559      |
| CH250-406G3    | AC217131                 | 8107991        | 8283493      |
| CH250-405N21   | AC217130                 | 8252767        | 8417927      |
| CH250-429O23   | AC234330                 | 8321309        | 8475535      |
| CH250-454C5    | AC234329                 | 8220669        | 8390741      |
| CH250-63P1     | AC231654                 | 8477122        | 8686768      |
| CH250-449N17   | AC217129                 | 8632679        | 8786585      |
| CH250-324L17   | AC217105                 | 8661406        | 8838469      |
| CH250-116D13   | AC232761                 | 8835736        | 9002807      |
| CH250-489E18   | AC225837                 | 8864514        | 9051478      |
| CH250-351E18   | AC225636                 | 9002180        | 9141063      |
| CH250-500O12   | AC209263                 | 9072191        | 9243731      |
| CH250-290P15   | AC208132                 | 9178269        | 9338264      |
| CH250-185E13   | AC208134                 | 9303517        | 9488431      |
| CH250-502N18   | AC208128                 | 9434149        | 9579023      |
| CH250-297A9    | AC211243                 | 9556265        | 9716395      |
| CH250-161E20   | AC208131                 | 9631825        | 9811209      |
| CH250-517K1    | AC208129                 | 9715405        | 9885628      |
| CH250-434B12   | AC240711                 | 9800240        | 9961034      |
| CH250-11J13    | AC240710                 | 10126901       | 10322331     |
| CH250-62E18    | AC234913                 | 10191476       | 10395727     |

| BAC name     | GenBank accession number | Start position | End position |
|--------------|--------------------------|----------------|--------------|
| CH250-249M17 | AC233735                 | 10343539       | 10527567     |
| CH250-59H13  | AC212028                 | 10421737       | 10571823     |
| CH250-99F15  | AC212487                 | 10480478       | 10664291     |
| CH250-161N14 | AC217138                 | 10638430       | 10814598     |
| CH250-492J9  | AC208955                 | 10699854       | 10878866     |
| CH250-285M20 | AC212789                 | 10812514       | 11021146     |
| CH250-317A11 | AC209447                 | 10879191       | 11053172     |
| CH250-194C7  | AC209446                 | 10938528       | 11137503     |
| CH250-118O14 | AC219066                 | 11091848       | 11253688     |

Supplementary Table 2. Palindromes in rhesus, human and chimpanzee MSYs

|            | Number of<br>palindromes | Average<br>arm length (kb) | Total<br>arm length (kb) | % of total<br>euchromatic sequence | Total # of genes<br>in palindromes |
|------------|--------------------------|----------------------------|--------------------------|------------------------------------|------------------------------------|
| Rhesus     | 3                        | 73                         | 437                      | 3.9                                | 4                                  |
| Human      | 8                        | 344                        | 5507                     | 24.2                               | 20                                 |
| Chimpanzee | 19                       | 198                        | 7516                     | 29.2                               | 15                                 |

Supplementary Table 3. Comparative analysis of rhesus and human MSY genes

| Stratum | Ancestral genes | Nucleotide position in rhesus MSY assembly |         |        | Coding sequence |                       | % divergence (rhesus - human) |        |         | Detecting purifying selection |                     |         |         |
|---------|-----------------|--------------------------------------------|---------|--------|-----------------|-----------------------|-------------------------------|--------|---------|-------------------------------|---------------------|---------|---------|
|         |                 | Start                                      | End     | Strand | ORF length      | % of human ORF length | mRNA                          | Coding | Introns | dN/dS <sup>1</sup>            | Fisher's exact test |         |         |
|         |                 |                                            |         |        |                 |                       |                               |        |         |                               | 95% C.I.            | p-value |         |
| 1       | <i>SRY</i>      | 81482                                      | 82385   | R      | 611             | 100                   | 6.60                          | 6.04   | n/a     | 0.55                          | 0.29                | 0.98    | 0.06    |
|         | <i>RBMY</i>     | 6271571                                    | 6284071 | R      | 695             | 47                    | 11.32                         | 9.04   | 12.21   | 0.54                          | 0.32                | 0.99    | 0.07    |
|         | <i>RPS4Y1</i>   | 122092                                     | 147116  | F      | 791             | 100                   | 3.90                          | 3.04   | 8.74    | 0.31                          | 0.14                | 0.70    | 0.005   |
|         | <i>RPS4Y2</i>   | 6055088                                    | 6082902 | F      | 791             | 100                   | 5.31                          | 4.55   | 9.58    | 0.26                          | 0.13                | 0.48    | <0.0001 |
|         | <i>HSFY1</i>    | 8006371                                    | 8008261 | R      | 1205            | 100                   | 7.76                          | 7.79   | 10.55   | 0.62                          | 0.42                | 0.91    | 0.02    |
|         | <i>HSFY2</i>    | 8384853                                    | 8386745 | F      | 1205            | 100                   | 9.16                          | 8.70   | 12.11   | 0.81                          | 0.55                | 1.19    | 0.3     |
|         | <i>HSFY3</i>    | 8553282                                    | 8555173 | R      | 1205            | 100                   | 9.29                          | 8.78   | 12.11   | 0.77                          | 0.53                | 1.15    | 0.2     |
| 2       | <i>KDM5D</i>    | 5560125                                    | 5599597 | R      | 4619            | 100                   | 5.09                          | 4.31   | 9.11    | 0.26                          | 0.20                | 0.35    | <0.0001 |
|         | <i>TSPY1</i>    | 6307721                                    | 6309591 | R      | 566             | 61                    | 11.27                         | 9.48   | 15.54   | 0.77                          | 0.41                | 1.26    | 0.3     |
|         | <i>TSPY2</i>    | 9880248                                    | 9881875 | R      | 821             | 89                    | 11.69                         | 9.76   | 15.67   | 0.69                          | 0.50                | 1.25    | 0.3     |
|         | <i>TSPY3</i>    | 9896624                                    | 9898258 | R      | 821             | 89                    | 11.69                         | 9.76   | 15.67   | 0.69                          | 0.50                | 1.25    | 0.3     |
|         | <i>TSPY4</i>    | 9913025                                    | 9914659 | R      | 821             | 89                    | 11.69                         | 9.76   | 15.67   | 0.69                          | 0.50                | 1.25    | 0.3     |
|         | <i>TSPY5</i>    | 9929422                                    | 9931056 | R      | 821             | 89                    | 11.69                         | 9.76   | 15.67   | 0.69                          | 0.50                | 1.25    | 0.3     |
| 3       | <i>ZFY</i>      | 239742                                     | 287462  | F      | 2405            | 100                   | 3.71                          | 2.08   | 7.63    | 0.17                          | 0.09                | 0.30    | <0.0001 |
|         | <i>DDX3Y</i>    | 2107890                                    | 2124485 | F      | 1979            | 100                   | 3.52                          | 2.28   | 9.01    | 0.19                          | 0.11                | 0.34    | <0.0001 |
|         | <i>UTY</i>      | 2366565                                    | 2577315 | R      | 4043            | 100                   | 4.38                          | 3.49   | 8.19    | 0.33                          | 0.25                | 0.46    | <0.0001 |
|         | <i>EIF1AY</i>   | 5853306                                    | 5870788 | F      | 434             | 100                   | 7.85                          | 2.75   | 8.55    | 0.10                          | 0.03                | 0.40    | 0.0003  |
|         | <i>CYorf15A</i> | 5408162                                    | 5432524 | F      | 395             | 100                   | 6.74                          | 5.79   | 9.10    | 0.33                          | 0.15                | 0.69    | 0.005   |
|         | <i>CYorf15B</i> | 5434583                                    | 5448447 | F      | 539             | 99                    | 6.26                          | 5.74   | 8.61    | 0.54                          | 0.27                | 1.05    | 0.07    |
|         | <i>USP9Y</i>    | 1904430                                    | 2077520 | F      | 7682            | 100                   | 3.67                          | 3.02   | 8.22    | 0.29                          | 0.23                | 0.37    | <0.0001 |
|         | <i>TMSB4Y</i>   | 2640014                                    | 2642403 | F      | 134             | 100                   | 10.22                         | 10.29  | 9.57    | 0.47                          | 0.17                | 1.12    | 0.1     |
| 4       | <i>AMELY</i>    | 659259                                     | 667900  | R      | 578             | 100                   | 4.89                          | 5.00   | 7.19    | 1.33                          | 0.61                | 2.98    | 0.5     |
|         | <i>NLGN4Y</i>   | 4143178                                    | 4465183 | F      | 2510            | 102                   | 6.90                          | 4.04   | 9.95    | 0.09                          | 0.05                | 0.13    | <0.0001 |
|         | <i>TBL1Y</i>    | 1058868                                    | 1127299 | F      | 1562            | 100                   | 6.78                          | 6.14   | 9.10    | 0.18                          | 0.12                | 0.26    | <0.0001 |



| Stratum | Ancestral genes                                                               | Nucleotide position in rhesus MSY assembly |          |        | Coding sequence |                       | % divergence (rhesus - human) |        |         | Detecting purifying selection |          |         |         |
|---------|-------------------------------------------------------------------------------|--------------------------------------------|----------|--------|-----------------|-----------------------|-------------------------------|--------|---------|-------------------------------|----------|---------|---------|
|         |                                                                               | Start                                      | End      | Strand | ORF length      | % of human ORF length | mRNA                          | Coding | Introns | Fisher's exact test           |          |         |         |
|         |                                                                               |                                            |          |        |                 |                       |                               |        |         | dN/dS*                        | 95% C.I. | p-value |         |
| 5       | <i>PRKY</i>                                                                   | 1189854                                    | 1297038  | F      | 1076            | 129                   | 8.28                          | 6.31   | 9.64    | 0.28                          | 0.16     | 0.46    | <0.0001 |
|         | <i>MXRA5Y</i>                                                                 | 1583565                                    | 1646589  | F      | 8405            | 642                   | 7.17                          | 7.35   | 8.67    | 0.99                          | 0.80     | 1.24    | 1.0     |
|         | <b>Average<sup>2,3</sup> (ancestral):</b>                                     |                                            |          |        |                 |                       | 6.55                          | 5.32   | 9.47    | 0.30                          | 0.27     | 0.34    | <0.0001 |
|         | <b>Average<sup>3</sup> (ancestral; single-copy in rhesus and human only):</b> |                                            |          |        |                 |                       | 5.88                          | 4.68   | 8.81    | 0.26                          | 0.23     | 0.29    | <0.0001 |
|         | Added genes                                                                   |                                            |          |        |                 |                       |                               |        |         |                               |          |         |         |
|         | <i>DAZ1</i>                                                                   | 9133192                                    | 9195151  | R      | 1796            | 80                    | 9.24                          | 7.53   | 11.00   | 0.92                          | 0.53     | 1.59    | 0.75    |
|         | <i>DAZ2</i>                                                                   | 10630299                                   | 10698472 | R      | 1742            | 78                    | 9.53                          | 11.03  | 11.27   | 0.62                          | 0.40     | 0.96    | 0.06    |
|         | <i>CDY1</i>                                                                   | 8812938                                    | 8815149  | R      | 1626            | 100                   | 10.92                         | 10.22  | n/a     | 0.41                          | 0.31     | 0.53    | <0.0001 |
|         | <i>CDY2</i>                                                                   | 8902500                                    | 8904710  | F      | 1625            | 100                   | 10.87                         | 10.16  | n/a     | 0.41                          | 0.32     | 0.54    | <0.0001 |
|         | <i>XKRY</i>                                                                   | 7641603                                    | 7643120  | R      | 749             | 212                   | 16.06                         | 14.40  | n/a     | 1.08                          | 0.75     | 1.57    | 0.7     |
|         | <b>Average<sup>2</sup> (added):</b>                                           |                                            |          |        |                 |                       | 11.44                         | 10.79  | 11.13   | 0.60                          | 0.50     | 0.72    | <0.0001 |

<sup>1</sup>dN/dS = Ratio of # of non-synonymous substitutions per non-synonymous site (dN) to # of synonymous substitutions per synonymous site (dS)

(Calculated using the CODEML program in the PAML package: Yang Z (1998) Mol Biol Evol 15:568-573)

(Fisher's exact test used to detect deviation of dN/dS ratio from neutrality or deviation from dN/dS = 1)

<sup>2</sup>Averages calculated using only one member of multicopy gene families with >99% identity

<sup>3</sup>Ancestral average does not include *MXKRA5Y*, which is a pseudogene in human

Supplementary Table 4. List of human X genes, organized by stratum, and conserved synteny in other vertebrates.

|                           | <u>Ensembl gene ID</u> | <u>Gene symbol</u> | <u>Human X Position</u> | <u>Syntenic chicken homolog</u> | <u>Most distant conserved synteny of genes without chicken syntenic homologs</u> |                     |                   |  |
|---------------------------|------------------------|--------------------|-------------------------|---------------------------------|----------------------------------------------------------------------------------|---------------------|-------------------|--|
|                           |                        |                    |                         |                                 | <u>Anolis or Xenopus</u>                                                         | <u>Metatherians</u> | <u>Eutherians</u> |  |
| Pseudo-autosomal region 1 | ENSG00000182378        | PLCXD1             | 132989                  |                                 |                                                                                  |                     |                   |  |
|                           | ENSG00000178605        | GTPBP6             | 160025                  |                                 |                                                                                  |                     |                   |  |
|                           | ENSG00000178605        | GTPBP6             | 168295                  |                                 |                                                                                  |                     |                   |  |
|                           | ENSG00000167393        | PPP2R3B            | 214970                  |                                 |                                                                                  |                     |                   |  |
|                           | ENSG00000185960        | SHOX               | 505079                  |                                 |                                                                                  |                     |                   |  |
|                           | ENSG00000205755        | CRLF2              | 1274885                 |                                 |                                                                                  |                     |                   |  |
|                           | ENSG00000198223        | CSF2RA             | 1347693                 |                                 |                                                                                  |                     |                   |  |
|                           | ENSG00000185291        | IL3RA              | 1415509                 |                                 |                                                                                  |                     |                   |  |
|                           | ENSG00000169100        | SLC25A6            | 1465144                 |                                 |                                                                                  |                     |                   |  |
|                           | ENSG00000169093        | ASMTL              | 1482032                 |                                 |                                                                                  |                     |                   |  |
|                           | ENSG00000182162        | P2RY8              | 1541468                 |                                 |                                                                                  |                     |                   |  |
|                           | ENSG00000197976        | SFRS17A            | 1670486                 |                                 |                                                                                  |                     |                   |  |
|                           | ENSG00000196433        | ASMT               | 1694024                 |                                 |                                                                                  |                     |                   |  |
|                           | ENSG00000169084        | DHRX               | 2147557                 |                                 |                                                                                  |                     |                   |  |
|                           | ENSG00000214717        | ZBED1              | 2414455                 |                                 |                                                                                  |                     |                   |  |
|                           | ENSG00000002586        | CD99               | 2619228                 |                                 |                                                                                  |                     |                   |  |
|                           | ENSG00000124343        | XG                 | 2680115                 |                                 |                                                                                  |                     |                   |  |
|                           | Stratum 5              | ENSG00000056998    | GYG2                    | 2756859                         |                                                                                  |                     |                   |  |
|                           |                        | ENSG00000006756    | ARSD                    | 2832011                         |                                                                                  |                     |                   |  |
| ENSG00000157399           |                        | ARSE               | 2862673                 |                                 |                                                                                  |                     |                   |  |
| ENSG00000205667           |                        | ARSH               | 2934654                 |                                 |                                                                                  |                     |                   |  |
| ENSG00000062096           |                        | ARSF               | 2969512                 |                                 |                                                                                  |                     |                   |  |
| ENSG00000101825           |                        | MXRA5              | 3236606                 |                                 |                                                                                  |                     |                   |  |
| ENSG00000183943           |                        | PRKX               | 3532415                 |                                 |                                                                                  |                     |                   |  |
| Stratum 4                 | ENSG00000146938        | NLGN4X             | 5818085                 |                                 |                                                                                  |                     |                   |  |
|                           | ENSG00000130021        | HDHD1A             | 6976961                 |                                 |                                                                                  |                     |                   |  |
|                           | ENSG00000101846        | STS                | 7147472                 |                                 |                                                                                  |                     |                   |  |
|                           | ENSG00000006757        | PNPLA4             | 7826804                 |                                 |                                                                                  |                     |                   |  |
|                           | ENSG00000011201        | KAL1               | 8456915                 |                                 |                                                                                  |                     |                   |  |

|           |                 |         |          |  |  |  |  |
|-----------|-----------------|---------|----------|--|--|--|--|
| Stratum 4 | ENSG00000183304 | FAM9A   | 8718836  |  |  |  |  |
|           | ENSG00000101849 | TBL1X   | 9391352  |  |  |  |  |
|           | ENSG00000101850 | GPR143  | 9653454  |  |  |  |  |
|           | ENSG00000146950 | SHROOM2 | 9714496  |  |  |  |  |
|           | ENSG00000047644 | WWC3    | 9943795  |  |  |  |  |
|           | ENSG00000073464 | CLCN4   | 10084985 |  |  |  |  |
|           | ENSG00000101871 | MID1    | 10373596 |  |  |  |  |
| Stratum 3 | ENSG00000004961 | HCCS    | 11039342 |  |  |  |  |
|           | ENSG00000047648 | ARHGAP6 | 11065584 |  |  |  |  |
|           | ENSG00000125363 | AMELX   | 11221454 |  |  |  |  |
|           | ENSG00000005302 | MSL3    | 11686199 |  |  |  |  |
|           | ENSG00000169933 | FRMPD4  | 12066506 |  |  |  |  |
|           | ENSG00000101911 | PRPS2   | 12719414 |  |  |  |  |
|           | ENSG00000196664 | TLR7    | 12795123 |  |  |  |  |
|           | ENSG00000101916 | TLR8    | 12834679 |  |  |  |  |
|           | ENSG00000205542 | TMSL2   | 12903150 |  |  |  |  |
|           | ENSG00000198759 | EGFL6   | 13497645 |  |  |  |  |
|           | ENSG00000176896 | TCEANC  | 13581146 |  |  |  |  |
|           | ENSG00000123595 | RAB9A   | 13617262 |  |  |  |  |
|           | ENSG00000196459 | TRAPPC2 | 13640282 |  |  |  |  |
|           | ENSG00000046651 | OFD1    | 13662785 |  |  |  |  |
|           | ENSG00000046653 | GPM6B   | 13698983 |  |  |  |  |
|           | ENSG00000046647 | GEMIN8  | 13934766 |  |  |  |  |
|           | ENSG00000101958 | GLRA2   | 14457565 |  |  |  |  |
|           | ENSG00000181544 | FANCB   | 14771450 |  |  |  |  |
|           | ENSG00000130150 | MOSPD2  | 14801484 |  |  |  |  |
|           | ENSG00000102048 | ASB9    | 15172030 |  |  |  |  |
|           | ENSG00000165192 | ASB11   | 15209759 |  |  |  |  |
|           | ENSG00000165195 | PIGA    | 15247503 |  |  |  |  |
|           | ENSG00000165197 | FIGF    | 15273640 |  |  |  |  |
|           | ENSG00000087842 | PIR     | 15312847 |  |  |  |  |
|           | ENSG00000102010 | BMX     | 15392290 |  |  |  |  |
|           | ENSG00000130234 | ACE2    | 15489077 |  |  |  |  |
|           | ENSG00000147003 | TMEM27  | 15555372 |  |  |  |  |
|           | ENSG00000186312 | CA5BP   | 15602976 |  |  |  |  |



Stratum 3

|                 |           |          |  |  |  |
|-----------------|-----------|----------|--|--|--|
| ENSG00000102172 | LOC646347 | 21868754 |  |  |  |
| ENSG00000102174 | PHEX      | 21960842 |  |  |  |
| ENSG00000175809 | ZNF645    | 22200986 |  |  |  |
| ENSG00000165186 | PTCHD1    | 23262906 |  |  |  |
| ENSG00000123131 | PRDX4     | 23592300 |  |  |  |
| ENSG00000123130 | ACOT9     | 23631698 |  |  |  |
| ENSG00000130066 | SAT1      | 23711211 |  |  |  |
| ENSG00000184831 | APOO      | 23761402 |  |  |  |
| ENSG00000165182 | CXORF58   | 23836044 |  |  |  |
| ENSG00000174010 | KLHL15    | 23915884 |  |  |  |
| ENSG00000130741 | EIF2S3    | 23982986 |  |  |  |
| ENSG00000180574 | AC068775  | 23999592 |  |  |  |
| ENSG00000005889 | ZFX       | 24077783 |  |  |  |
| ENSG00000067992 | PDK3      | 24393475 |  |  |  |
| ENSG00000102230 | PCYT1B    | 24486125 |  |  |  |
| ENSG00000101868 | POLA1     | 24621957 |  |  |  |
| ENSG00000004848 | ARX       | 24932213 |  |  |  |
| ENSG00000176774 | MAGEB18   | 26066381 |  |  |  |
| ENSG00000176746 | MAGEB6    | 26120478 |  |  |  |
| ENSG00000188408 | MAGEB5    | 26145340 |  |  |  |
| ENSG00000177689 | MAGEB10   | 27736028 |  |  |  |
| ENSG00000189186 | DCAF8L1   | 27907570 |  |  |  |
| ENSG00000169306 | IL1RAPL1  | 28515437 |  |  |  |
| ENSG00000099399 | MAGEB2    | 30143601 |  |  |  |
| ENSG00000198798 | MAGEB3    | 30158474 |  |  |  |
| ENSG00000120289 | MAGEB4    | 30170090 |  |  |  |
| ENSG00000214107 | MAGEB1    | 30171769 |  |  |  |
| ENSG00000169297 | NR0B1     | 30232507 |  |  |  |
| ENSG00000120280 | CXORF21   | 30486862 |  |  |  |
| ENSG00000178556 | CKS1BP6   | 30545410 |  |  |  |
| ENSG00000198814 | GK        | 30581397 |  |  |  |
| ENSG00000196475 | GK2       | 30648889 |  |  |  |
| ENSG00000157625 | TAB3      | 30755480 |  |  |  |
| ENSG00000132446 | FTHL17    | 30999279 |  |  |  |
| ENSG00000198947 | DMD       | 31042729 |  |  |  |



|           |                 |         |          |  |  |  |  |
|-----------|-----------------|---------|----------|--|--|--|--|
| Stratum 3 | ENSG00000069509 | FUNDC1  | 44267847 |  |  |  |  |
|           | ENSG00000189037 | DUSP21  | 44588194 |  |  |  |  |
|           | ENSG00000147050 | KDM6A   | 44617415 |  |  |  |  |
|           | ENSG00000147113 | CXORF36 | 44892563 |  |  |  |  |
|           | ENSG00000175176 | ZNF674  | 46243490 |  |  |  |  |
|           | ENSG00000147119 | CHST7   | 46318136 |  |  |  |  |
|           | ENSG00000065923 | SLC9A7  | 46351081 |  |  |  |  |
|           | ENSG00000102218 | RP2     | 46581319 |  |  |  |  |
|           | ENSG00000102221 | PHF16   | 46656680 |  |  |  |  |
|           | ENSG00000130988 | RGN     | 46822719 |  |  |  |  |
| Stratum 2 | ENSG00000147123 | NDUFB11 | 46886559 |  |  |  |  |
|           | ENSG00000182872 | RBM10   | 46889575 |  |  |  |  |
|           | ENSG00000130985 | UBA1    | 46935204 |  |  |  |  |
|           | ENSG00000102225 | CDK16   | 46962576 |  |  |  |  |
|           | ENSG00000102226 | USP11   | 46977258 |  |  |  |  |
|           | ENSG00000147117 | ZNF157  | 47114943 |  |  |  |  |
|           | ENSG00000147124 | ZNF41   | 47191352 |  |  |  |  |
|           | ENSG00000078061 | ARAF    | 47305522 |  |  |  |  |
|           | ENSG00000008056 | SYN1    | 47316244 |  |  |  |  |
|           | ENSG00000102265 | TIMP1   | 47326634 |  |  |  |  |
|           | ENSG00000126759 | CFP     | 47368557 |  |  |  |  |
|           | ENSG00000126767 | ELK1    | 47379864 |  |  |  |  |
|           | ENSG00000126756 | UXT     | 47396140 |  |  |  |  |
|           | ENSG00000187893 | CXXC1P1 | 47467857 |  |  |  |  |
|           | ENSG00000188459 | WASF4   | 47541297 |  |  |  |  |
|           | ENSG00000197779 | ZNF81   | 47581245 |  |  |  |  |
|           | ENSG00000147118 | ZNF182  | 47719195 |  |  |  |  |
|           | ENSG00000171489 | SPACA5B | 47748678 |  |  |  |  |
|           | ENSG00000221994 | ZNF630  | 47802547 |  |  |  |  |
|           | ENSG00000171478 | SPACA5B | 47875014 |  |  |  |  |
|           | ENSG00000165583 | SSX5    | 47930600 |  |  |  |  |
|           | ENSG00000017483 | SLC38A5 | 48201866 |  |  |  |  |
|           | ENSG00000068438 | FTSJ1   | 48219493 |  |  |  |  |
|           | ENSG00000102312 | PORCN   | 48252307 |  |  |  |  |
|           | ENSG00000147155 | EBP     | 48265177 |  |  |  |  |





Stratum 2

|                 |          |          |  |  |  |
|-----------------|----------|----------|--|--|--|
| ENSG00000147082 | CCNB3    | 49856156 |  |  |  |
| ENSG00000204466 | DGKK     | 50128637 |  |  |  |
| ENSG00000158352 | SHROOM4  | 50351387 |  |  |  |
| ENSG00000130385 | BMP15    | 50670475 |  |  |  |
| ENSG00000122824 | NUDT10   | 51091823 |  |  |  |
| ENSG00000187690 | CXORF67  | 51166507 |  |  |  |
| ENSG00000196368 | NUDT11   | 51249603 |  |  |  |
| ENSG00000189369 | GSPT2    | 51503267 |  |  |  |
| ENSG00000179222 | MAGED1   | 51562895 |  |  |  |
| ENSG00000187243 | MAGED4   | 51821663 |  |  |  |
| ENSG00000154545 | MAGED4   | 51944659 |  |  |  |
| ENSG00000184194 | GPR173   | 53095231 |  |  |  |
| ENSG00000184205 | TSPYL2   | 53128274 |  |  |  |
| ENSG00000126012 | KDM5C    | 53237381 |  |  |  |
| ENSG00000124313 | IQSEC2   | 53278784 |  |  |  |
| ENSG00000072501 | SMC1A    | 53417795 |  |  |  |
| ENSG00000158423 | RIBC1    | 53466575 |  |  |  |
| ENSG00000072506 | HSD17B10 | 53474931 |  |  |  |
| ENSG00000086758 | HUWE1    | 53575782 |  |  |  |
| ENSG00000172943 | PHF8     | 53979834 |  |  |  |
| ENSG00000184083 | FAM120C  | 54111482 |  |  |  |
| ENSG00000196632 | WNK3     | 54239580 |  |  |  |
| ENSG00000158526 | TSR2     | 54483578 |  |  |  |
| ENSG00000102302 | FGD1     | 54488614 |  |  |  |
| ENSG00000130119 | GNL3L    | 54570464 |  |  |  |
| ENSG00000102313 | ITIH5L   | 54792341 |  |  |  |
| ENSG00000102316 | MAGED2   | 54850757 |  |  |  |
| ENSG00000067445 | TRO      | 54963969 |  |  |  |
| ENSG00000158571 | PFKFB1   | 54976315 |  |  |  |
| ENSG00000169188 | APEX2    | 55043505 |  |  |  |
| ENSG00000158578 | ALAS2    | 55052213 |  |  |  |
| ENSG00000187601 | MAGEH1   | 55495263 |  |  |  |
| ENSG00000185295 | USP51    | 55529687 |  |  |  |
| ENSG00000189299 | FOXR2    | 55666558 |  |  |  |
| ENSG00000083750 | RRAGB    | 55760897 |  |  |  |

|           |                 |         |          |  |  |  |  |
|-----------|-----------------|---------|----------|--|--|--|--|
| Stratum 2 | ENSG00000102349 | KLF8    | 56275632 |  |  |  |  |
|           | ENSG00000188021 | UBQLN2  | 56606797 |  |  |  |  |
|           | ENSG00000204271 | SPIN3   | 57033990 |  |  |  |  |
|           | ENSG00000186787 | SPIN2B  | 57162840 |  |  |  |  |
|           | ENSG00000147059 | SPIN2A  | 57177688 |  |  |  |  |
|           | ENSG00000165591 | FAAH2   | 57329864 |  |  |  |  |
|           | ENSG00000198205 | ZXDA    | 57949867 |  |  |  |  |
| Stratum 1 | ENSG00000186767 | SPIN4   | 62483832 |  |  |  |  |
|           | ENSG00000131089 | ARHGEF9 | 62771572 |  |  |  |  |
|           | ENSG00000184675 | FAM123B | 63321722 |  |  |  |  |
|           | ENSG00000198881 | ASB12   | 63360801 |  |  |  |  |
|           | ENSG00000102043 | MTMR8   | 63404687 |  |  |  |  |
|           | ENSG00000126970 | ZC4H2   | 64052987 |  |  |  |  |
|           | ENSG00000102053 | ZC3H12B | 64625431 |  |  |  |  |
|           | ENSG00000001497 | LAS1L   | 64649188 |  |  |  |  |
|           | ENSG00000147065 | MSN     | 64804283 |  |  |  |  |
|           | ENSG00000155659 | VSIG4   | 65158307 |  |  |  |  |
|           | ENSG00000089472 | HEPH    | 65299388 |  |  |  |  |
|           | ENSG00000089472 | HEPH    | 65403953 |  |  |  |  |
|           | ENSG00000131080 | EDA2R   | 65732204 |  |  |  |  |
|           | ENSG00000169083 | AR      | 66680599 |  |  |  |  |
|           | ENSG00000079482 | OPHN1   | 67179440 |  |  |  |  |
|           | ENSG00000181704 | YIPF6   | 67635611 |  |  |  |  |
|           | ENSG00000130052 | STARD8  | 67784229 |  |  |  |  |
|           | ENSG00000090776 | EFNB1   | 67965556 |  |  |  |  |
|           | ENSG00000181191 | PJA1    | 68297422 |  |  |  |  |
|           | ENSG00000215162 | CXORF62 | 68316125 |  |  |  |  |
|           | ENSG00000130054 | FAM155B | 68641803 |  |  |  |  |
|           | ENSG00000158813 | EDA     | 68752636 |  |  |  |  |
|           | ENSG00000147160 | AWAT2   | 69177117 |  |  |  |  |
|           | ENSG00000189401 | OTUD6A  | 69199066 |  |  |  |  |
|           | ENSG00000089289 | IGBP1   | 69270043 |  |  |  |  |
|           | ENSG00000184210 | DGAT2L6 | 69314061 |  |  |  |  |
|           | ENSG00000204195 | AWAT1   | 69371271 |  |  |  |  |
|           | ENSG00000186912 | P2RY4   | 69394745 |  |  |  |  |





Stratum 1

|                 |             |          |  |  |  |
|-----------------|-------------|----------|--|--|--|
| ENSG00000147138 | GPR174      | 78313125 |  |  |  |
| ENSG00000078596 | ITM2A       | 78502541 |  |  |  |
| ENSG00000122145 | TBX22       | 79156911 |  |  |  |
| ENSG00000215104 | RP11-217H19 | 79414226 |  |  |  |
| ENSG00000174016 | FAM46D      | 79562602 |  |  |  |
| ENSG00000183665 | TRMT12      | 79580677 |  |  |  |
| ENSG00000165288 | BRWD3       | 79818351 |  |  |  |
| ENSG00000198157 | HMG5        | 80255856 |  |  |  |
| ENSG00000198157 | HMG5        | 80263772 |  |  |  |
| ENSG00000131171 | SH3BGRL     | 80344278 |  |  |  |
| ENSG00000196767 | POU3F4      | 82649941 |  |  |  |
| ENSG00000183035 | CYLC1       | 83002826 |  |  |  |
| ENSG00000072133 | RPS6KA6     | 83205640 |  |  |  |
| ENSG00000165259 | HDX         | 83459541 |  |  |  |
| ENSG00000155008 | APOOL       | 84145559 |  |  |  |
| ENSG00000184788 | SATL1       | 84222096 |  |  |  |
| ENSG00000147180 | ZNF711      | 84385653 |  |  |  |
| ENSG00000124429 | POF1B       | 84419058 |  |  |  |
| ENSG00000188419 | CHM         | 85002841 |  |  |  |
| ENSG00000203668 | CHML        | 85098025 |  |  |  |
| ENSG00000126733 | DACH2       | 85290118 |  |  |  |
| ENSG00000102271 | KLHL4       | 86659425 |  |  |  |
| ENSG00000153779 | TGIF2LX     | 89063537 |  |  |  |
| ENSG00000174740 | PABPC5      | 90576250 |  |  |  |
| ENSG00000102290 | PCDH11X     | 90920960 |  |  |  |
| ENSG00000186310 | NAP1L3      | 92812585 |  |  |  |
| ENSG00000179083 | FAM133A     | 92815861 |  |  |  |
| ENSG00000147202 | DIAPH2      | 95826365 |  |  |  |
| ENSG00000204086 | RPA4        | 96025668 |  |  |  |
| ENSG00000165194 | PCDH19      | 99433300 |  |  |  |
| ENSG00000000005 | TNMD        | 99726446 |  |  |  |
| ENSG00000000003 | TSPAN6      | 99770451 |  |  |  |
| ENSG00000102359 | SRPX2       | 99785819 |  |  |  |
| ENSG00000102362 | SYTL4       | 99816144 |  |  |  |
| ENSG00000101811 | CSTF2       | 99962004 |  |  |  |

Stratum 1

|                 |              |           |  |  |  |  |
|-----------------|--------------|-----------|--|--|--|--|
| ENSG00000177613 | CSTF2T       | 99963894  |  |  |  |  |
| ENSG00000007952 | NOX1         | 99984969  |  |  |  |  |
| ENSG00000182489 | XKRX         | 100055090 |  |  |  |  |
| ENSG00000174225 | ARL13A       | 100111356 |  |  |  |  |
| ENSG00000188917 | TRMT2B       | 100150992 |  |  |  |  |
| ENSG00000126950 | TMEM35       | 100220519 |  |  |  |  |
| ENSG00000102384 | CENPI        | 100239827 |  |  |  |  |
| ENSG00000102385 | DRP2         | 100361414 |  |  |  |  |
| ENSG00000102387 | TAF7L        | 100409898 |  |  |  |  |
| ENSG00000178913 | TAF7         | 100425228 |  |  |  |  |
| ENSG00000126953 | TIMM8A       | 100487308 |  |  |  |  |
| ENSG00000010671 | BTK          | 100491091 |  |  |  |  |
| ENSG00000126945 | RPL36AP37    | 100532633 |  |  |  |  |
| ENSG00000102393 | GLA          | 100539435 |  |  |  |  |
| ENSG00000126945 | RPL36AP37    | 100553941 |  |  |  |  |
| ENSG00000196440 | ARMCX4       | 100627118 |  |  |  |  |
| ENSG00000126947 | ARMCX1       | 100692170 |  |  |  |  |
| ENSG00000204072 | ARMCX6       | 100739145 |  |  |  |  |
| ENSG00000198960 | ARMCX6       | 100756772 |  |  |  |  |
| ENSG00000102401 | ARMCX3       | 100764776 |  |  |  |  |
| ENSG00000184867 | ARMCX2       | 100796923 |  |  |  |  |
| ENSG00000126952 | NXF5         | 100973741 |  |  |  |  |
| ENSG00000166432 | ZMAT1        | 101023918 |  |  |  |  |
| ENSG00000184905 | TCEAL2       | 101267316 |  |  |  |  |
| ENSG00000204071 | TCEAL6       | 101281589 |  |  |  |  |
| ENSG00000184515 | BEX5         | 101295340 |  |  |  |  |
| ENSG00000185554 | NXF2         | 101356936 |  |  |  |  |
| ENSG00000215046 | LLOXNC01-19[ | 101356936 |  |  |  |  |
| ENSG00000158164 | TMSB15B      | 101655266 |  |  |  |  |
| ENSG00000196970 | NXF4         | 101691549 |  |  |  |  |
| ENSG00000125962 | ARMCX5       | 101740752 |  |  |  |  |
| ENSG00000198932 | GPRASP1      | 101792950 |  |  |  |  |
| ENSG00000158301 | GPRASP2      | 101853760 |  |  |  |  |
| ENSG00000198908 | BHLHB9       | 101862310 |  |  |  |  |
| ENSG00000102128 | RAB40AL      | 102078856 |  |  |  |  |







Stratum 1

|                 |            |           |  |  |  |
|-----------------|------------|-----------|--|--|--|
| ENSG00000147246 | HTR2C      | 113724807 |  |  |  |
| ENSG00000165502 | RPL36AL    | 113730376 |  |  |  |
| ENSG00000123496 | IL13RA2    | 114144794 |  |  |  |
| ENSG00000130224 | LRCH2      | 114251441 |  |  |  |
| ENSG00000170748 | RBMXL2     | 114330261 |  |  |  |
| ENSG00000213516 | CCBL2      | 114330261 |  |  |  |
| ENSG00000102024 | PLS3       | 114701740 |  |  |  |
| ENSG00000180772 | AGTR2      | 115215986 |  |  |  |
| ENSG00000087916 | SLC6A14    | 115481818 |  |  |  |
| ENSG00000003096 | KLHL13     | 116915804 |  |  |  |
| ENSG00000198642 | KLHL9      | 116928087 |  |  |  |
| ENSG00000131725 | WDR44      | 117364070 |  |  |  |
| ENSG00000147251 | DOCK11     | 117513900 |  |  |  |
| ENSG00000131724 | IL13RA1    | 117745587 |  |  |  |
| ENSG00000174460 | ZCCHC12    | 117841774 |  |  |  |
| ENSG00000175556 | LONRF3     | 117992609 |  |  |  |
| ENSG00000175553 | KIAA1210   | 118096627 |  |  |  |
| ENSG00000101856 | PGRMC1     | 118254279 |  |  |  |
| ENSG00000214992 | AC004835.2 | 118270637 |  |  |  |
| ENSG00000077713 | SLC25A43   | 118397679 |  |  |  |
| ENSG00000005022 | SLC25A5P8  | 118486436 |  |  |  |
| ENSG00000018610 | CXORF56    | 118556140 |  |  |  |
| ENSG00000077721 | UBE2A      | 118592527 |  |  |  |
| ENSG00000186416 | NKRF       | 118606328 |  |  |  |
| ENSG00000125354 | SEPT6      | 118633715 |  |  |  |
| ENSG00000187808 | ANKRD58    | 118776604 |  |  |  |
| ENSG00000198918 | RPL39      | 118804497 |  |  |  |
| ENSG00000214289 | RPL39P5    | 118808002 |  |  |  |
| ENSG00000125351 | UPF3B      | 118852017 |  |  |  |
| ENSG00000125352 | RNF113A    | 118888466 |  |  |  |
| ENSG00000125356 | NDUFA1     | 118889762 |  |  |  |
| ENSG00000186471 | AKAP14     | 118913828 |  |  |  |
| ENSG00000101882 | NKAP       | 118943052 |  |  |  |
| ENSG00000189134 | NKAPL      | 118943390 |  |  |  |
| ENSG00000177485 | ZBTB33     | 119268635 |  |  |  |





Stratum 1

|                 |             |           |  |  |  |
|-----------------|-------------|-----------|--|--|--|
| ENSG0000022267  | FHL1        | 135057346 |  |  |  |
| ENSG00000129680 | MAP7D3      | 135123047 |  |  |  |
| ENSG00000156920 | GPR112      | 135210788 |  |  |  |
| ENSG00000102239 | BRS3        | 135397791 |  |  |  |
| ENSG00000102241 | HTATSF1     | 135407337 |  |  |  |
| ENSG00000102243 | VGLL1       | 135441977 |  |  |  |
| ENSG00000102245 | CD40LG      | 135558002 |  |  |  |
| ENSG00000129675 | ARHGEF6     | 135575372 |  |  |  |
| ENSG00000147274 | RBMX        | 135783288 |  |  |  |
| ENSG00000165370 | GPR101      | 135939973 |  |  |  |
| ENSG00000156925 | ZIC3        | 136476012 |  |  |  |
| ENSG00000129682 | FGF13       | 137541401 |  |  |  |
| ENSG00000101981 | F9          | 138440561 |  |  |  |
| ENSG00000101977 | MCF2        | 138491596 |  |  |  |
| ENSG00000101974 | ATP11C      | 138636171 |  |  |  |
| ENSG00000203933 | CXORF66     | 138865550 |  |  |  |
| ENSG00000134595 | SOX3        | 139412818 |  |  |  |
| ENSG00000184258 | CDR1        | 139692236 |  |  |  |
| ENSG00000182195 | LDOC1       | 140097596 |  |  |  |
| ENSG00000165509 | MAGEC3      | 140753768 |  |  |  |
| ENSG00000155495 | MAGEC1      | 140819346 |  |  |  |
| ENSG00000046774 | MAGEC2      | 141117797 |  |  |  |
| ENSG00000179542 | SLITRK4     | 142543610 |  |  |  |
| ENSG00000102069 | UBE2NL      | 142794839 |  |  |  |
| ENSG00000185985 | LOC10012909 | 144707381 |  |  |  |
| ENSG00000221870 | CXORF1      | 144716888 |  |  |  |
| ENSG00000102081 | FMR1        | 146801173 |  |  |  |
| ENSG00000176988 | FMR1NB      | 146870541 |  |  |  |
| ENSG00000155966 | AFF2        | 147389831 |  |  |  |
| ENSG00000010404 | IDS         | 148368206 |  |  |  |
| ENSG00000176289 | IDSP1       | 148414420 |  |  |  |
| ENSG00000197620 | CXORF40A    | 148430463 |  |  |  |
| ENSG00000123584 | MAGEA9B     | 148471105 |  |  |  |
| ENSG00000171129 | HSFX2       | 148481974 |  |  |  |
| ENSG00000155984 | TMEM185A    | 148486016 |  |  |  |





Stratum 1

|                  |                  |          |           |  |  |  |  |
|------------------|------------------|----------|-----------|--|--|--|--|
|                  | ENSG00000013563  | DNASE1L1 | 153282773 |  |  |  |  |
|                  | ENSG000000102125 | TAZ      | 153293071 |  |  |  |  |
|                  | ENSG000000071553 | ATP6AP1  | 153310172 |  |  |  |  |
|                  | ENSG000000203879 | GDI1     | 153318705 |  |  |  |  |
|                  | ENSG000000071859 | FAM50A   | 153325698 |  |  |  |  |
|                  | ENSG000000130827 | PLXNA3   | 153339817 |  |  |  |  |
|                  | ENSG000000196976 | LAGE3    | 153358435 |  |  |  |  |
|                  | ENSG000000102178 | UBL4A    | 153365254 |  |  |  |  |
|                  | ENSG000000126903 | SLC10A3  | 153368842 |  |  |  |  |
|                  | ENSG000000071889 | FAM3A    | 153387696 |  |  |  |  |
|                  | ENSG000000160211 | G6PD     | 153412800 |  |  |  |  |
|                  | ENSG000000073009 | IKBKG    | 153423672 |  |  |  |  |
|                  | ENSG000000160219 | GAB3     | 153556725 |  |  |  |  |
|                  | ENSG000000130826 | DKC1     | 153637340 |  |  |  |  |
|                  | ENSG000000100721 | TCL1A    | 153646932 |  |  |  |  |
|                  | ENSG000000130830 | MPP1     | 153660162 |  |  |  |  |
|                  | ENSG000000185010 | F8       | 153717257 |  |  |  |  |
|                  | ENSG000000198082 | H2AFB1   | 153766511 |  |  |  |  |
|                  | ENSG000000197932 | F8A1     | 153767829 |  |  |  |  |
|                  | ENSG000000165775 | FUNDC2   | 153908258 |  |  |  |  |
|                  | ENSG000000165775 | FUNDC2   | 153938384 |  |  |  |  |
|                  | ENSG000000182712 | MTCP1    | 153943091 |  |  |  |  |
|                  | ENSG000000214827 | MTCP1    | 153943098 |  |  |  |  |
|                  | ENSG000000185515 | BRCC3    | 153952889 |  |  |  |  |
|                  | ENSG000000155959 | VBP1     | 154097744 |  |  |  |  |
|                  | ENSG000000155961 | RAB39B   | 154140721 |  |  |  |  |
|                  | ENSG000000155962 | CLIC2    | 154158720 |  |  |  |  |
|                  | ENSG000000198307 | H2AFB2   | 154263622 |  |  |  |  |
|                  | ENSG000000185978 | H2AFB2   | 154342270 |  |  |  |  |
|                  | ENSG000000185973 | TMLHE    | 154372967 |  |  |  |  |
| Pseudo-autosomal | ENSG000000168939 | SPRY3    | 154650645 |  |  |  |  |
| region 2         | ENSG000000124333 | VAMP7    | 154764207 |  |  |  |  |
|                  | ENSG000000182484 | WASH6P   | 154903161 |  |  |  |  |

Supplementary Table 5. Copy numbers of rhesus, human, and chimpanzee MSY genes

| Origin              | Stratum       | Gene            | Copy number of gene in indicated species |                    |                         |           |
|---------------------|---------------|-----------------|------------------------------------------|--------------------|-------------------------|-----------|
|                     |               |                 | Rhesus                                   | Human <sup>1</sup> | Chimpanzee <sup>2</sup> |           |
| Ancestral           | 1             | <i>SRY</i>      | 1                                        | 1                  | 1                       |           |
|                     |               | <i>RBMV</i>     | 1                                        | 6                  | 6                       |           |
|                     |               | <i>RPS4Y1</i>   | 1                                        | 1                  | 1                       |           |
|                     |               | <i>RPS4Y2</i>   | 1                                        | 1                  | 1                       |           |
|                     |               | <i>HSFY</i>     | 3                                        | 2                  | 0                       |           |
|                     | 2             | <i>KDM5D</i>    | 1                                        | 1                  | 1                       |           |
|                     |               | <i>TSPY</i>     | 5                                        | 35                 | 6                       |           |
|                     | 3             | <i>ZFY</i>      | 1                                        | 1                  | 1                       |           |
|                     |               | <i>DDX3Y</i>    | 1                                        | 1                  | 1                       |           |
|                     |               | <i>UTY</i>      | 1                                        | 1                  | 1                       |           |
|                     |               | <i>EIF1AY</i>   | 1                                        | 1                  | 1                       |           |
|                     |               | <i>CYorf15A</i> | 1                                        | 1                  | 1                       |           |
|                     |               | <i>CYorf15B</i> | 1                                        | 1                  | 0                       |           |
|                     |               | <i>USP9Y</i>    | 1                                        | 1                  | 0                       |           |
|                     |               | <i>TMSB4Y</i>   | 1                                        | 1                  | 0                       |           |
|                     |               | 4               | <i>AMELY</i>                             | 1                  | 1                       | 1         |
|                     |               |                 | <i>NLGN4Y</i>                            | 1                  | 1                       | 1         |
|                     | <i>TBL1Y</i>  |                 | 1                                        | 1                  | 0                       |           |
|                     | 5             | <i>PRKY</i>     | 1                                        | 1                  | 1                       |           |
|                     |               | <i>MXRA5Y</i>   | 1                                        | 0                  | 0                       |           |
|                     | <b>Total:</b> |                 |                                          | <b>26</b>          | <b>59</b>               | <b>24</b> |
|                     | Added         |                 | <i>DAZ</i>                               | 2                  | 4                       | 4         |
|                     |               |                 | <i>CDY</i>                               | 2                  | 4                       | 5         |
|                     |               |                 | <i>XKRY</i>                              | 1                  | 2                       | 0         |
|                     |               | <i>VCY</i>      | 0                                        | 2                  | 2                       |           |
|                     |               | <i>BPY2</i>     | 0                                        | 3                  | 2                       |           |
|                     |               | <i>PRY</i>      | 0                                        | 2                  | 0                       |           |
|                     |               | <i>PCDH11Y</i>  | 0                                        | 1                  | 0                       |           |
|                     |               | <i>TGIF2LY</i>  | 0                                        | 1                  | 0                       |           |
| <b>Total:</b>       |               |                 | <b>5</b>                                 | <b>19</b>          | <b>13</b>               |           |
| <b>Grand Total:</b> |               |                 | <b>31</b>                                | <b>78</b>          | <b>37</b>               |           |

<sup>1</sup>Gene numbers for human from Skaletsky *et al.*, 2003, Nature 423:825-37

<sup>2</sup>Gene numbers for chimpanzee from Hughes, *et al.* 2010, Nature 463:536-9



Supplementary Table 6. Parameters of one-phase exponential decay models of gene numbers in MSY strata

| Stratum | $N_0$ | K<br>( $\text{my}^{-1}$ ) | Half-life<br>(my) | Baseline | R squared |
|---------|-------|---------------------------|-------------------|----------|-----------|
| 1       | 414   | 0.144                     | 4.8               | 5        | 1.00      |
| 2       | 88    | 0.288                     | 2.4               | 2        | 1.00      |
| 3       | 143   | 0.433                     | 1.6               | 8        | 1.00      |
| 4       | 12    | 2.020                     | 0.34              | 3        | 1.00      |
| 5       | 7     | 0.325                     | 2.1               | 1        | 1.00      |

$N_0$  Starting number of genes

K Decay constant

my Millions of years

Supplementary Table 7. PCR primers for radiation hybrid mapping

| Marker | BAC location of marker | Product size (bp) | Left primer               | Right primer         |
|--------|------------------------|-------------------|---------------------------|----------------------|
| 0671   | CH250-57C20            | 200               | CATGAATGTTACTGAATCTTCAACG | GGAATTAGAAGTGCCTGCGA |
| 0829   | CH250-56H16            | 253               | TCTGAACAAAGGACTGACAGGA    | CTTGAGGCTTGCAACTTGAT |
| 1030   | CH250-364B23           | 327               | CTTTGTCCCTCACTGGTGGT      | AGTCAAGGGGTGTTGGACTG |
| 1060   | CH250-198P20           | 337               | GCTCTCAGTGACTGCTTCCA      | TCTGCACATGTACCCCAGAA |
| 1121   | CH250-374B3            | 325               | GCCATTGTCAAGAGAGCACA      | ACACTTGCTGTCAGGGGAAA |
| 1258   | CH250-209A4            | 341               | CTGTGAGCAGTTGTAGGCCA      | ACTTTCTCCCGCTTTCCTTC |
| 0830   | CH250-517K1            | 345               | GGAATTCTCCAGCAAACACG      | CCCACATCTCTCTCACACC  |
| 1291   | CH250-62E18            | 263               | CCTTCCAGGGAGAGATTTCA      | AGGGGGAGTTGTAACCAAGG |
| 1264   | CH250-249M17           | 311               | TTTGGATGCAGTGTGGAA        | TCAAACCACAACATGTGCAG |

Supplementary Table 8. Primers for RT-PCR analysis of rhesus MSY genes

| Gene            | Product size (bp) | Left primer                | Right primer               |
|-----------------|-------------------|----------------------------|----------------------------|
| <i>CDY</i>      | 736               | AACAACACGGATCCAAAAGC       | TCAAGACCGCAACAAAACAC       |
| <i>CYorf15A</i> | 595               | GAAGTAGGGAAAAGAGGTAATACCCA | CAAAGGCTGGTAGGGTTTCC       |
| <i>CYorf15B</i> | 495               | TGCTTCTAGGCTACTTTTTCTCC    | TTCTCTCAGCCATTTGCAG        |
| <i>DAZ1</i>     | 782               | CCAAATCCACCAGGTGCA         | CAGATTTCCCTTTTGCTCCC       |
| <i>DAZ2</i>     | 677               | GGTCCGCTTTTAGAGGCTCT       | GTTATAGGATTCAGCGCGACTC     |
| <i>DDX3Y</i>    | 661               | GCCACCTCATTCTTTAATGAAAAA   | CGAACGATCCTCAGTCACAA       |
| <i>EIF1AY</i>   | 690               | TGAGGCATCTTAGGTCAGCC       | GGGTCATCAGCTTCCAAAGA       |
| <i>HSFY1/2</i>  | 687               | CCACCTTTCTGGCTGAAGAG       | GCCTGAAAAGAGGGCTAGAT       |
| <i>HSFY3</i>    | 604               | TGAAGATTTCAACAGGAAGCA      | TGGTACTCTTTAATGGAAGATCAG   |
| <i>JARID1D</i>  | 617               | CACTGACACCATCCCTCATG       | CGGCAACAGTGAGGACAGTA       |
| <i>MXRA5Y</i>   | 827               | TGAGCACAAGGAGGAGAGCA       | GCGCCATGCATACTAGCTCA       |
| <i>NLGN4Y</i>   | 739               | GTACCCGCCGATCTCCTG         | TGCCAATGAGAAGTGTCTGC       |
| <i>PRKY</i>     | 988               | AAGCTCACGGACTTTGGATTT      | TGTTGTCCCCAAGAGAAGAAAA     |
| <i>RBMV</i>     | 666               | TGCATACGACCTGAGGACTG       | GAAGAGGTCGGCTCTCTGTG       |
| <i>RPS4Y1</i>   | 963               | TTCCAGGCTGTGAACTCTATAGC    | GGCAAAGAAAAAAGATACACTGC    |
| <i>RPS4Y2</i>   | 917               | CGGATTACGACCACAGAGTACG     | GAAACAGGAATTCACTGTTTATTTGT |
| <i>TBL1Y</i>    | 704               | TGTTGAAATTCACCCAACA        | CCTGAAGATTGTGAACGCAT       |
| <i>TMSB4Y</i>   | 665               | ATTCGCAGTGGTCAATTTCC       | ATTCACTGCCATCCCCTC         |
| <i>TSPY</i>     | 458               | GCAAACCACCCTCAGATGTC       | TCAGCTCTGATCACTCCATCA      |
| <i>USP9Y</i>    | 675               | TCCCTCATCCGAGTGCATA        | AGGTGGCCTTCCAGTATCAG       |
| <i>UTY</i>      | 559               | CAATTAGGTCACTTCAACCTATTGC  | CAGAATTAGGATCTGCCTCCAGT    |
| <i>XKRY</i>     | 333               | TGTGTACCATTGTTGGCACC       | GATGAGCTGCATGGCAATTA       |
| <i>ZFY</i>      | 572               | ATCATTACTGATCCTCTGACCAGT   | ACGAAGGTTTTCATTTTCATCC     |
